# Supplementary material
Source: PubMed Central journal article supplement (PMC7365701)

# Evolution of a 4-Benzyloxy-benzylamino Chemotype to Provide Efficacious, Potent, and Isoform Selective PPAR $\alpha$ Agonists as Leads for Retinal Disorders

Xiaozheng Dou,<sup>†,§</sup> Dinesh Nath,<sup>†,§</sup> Henry Shin,<sup>‡</sup> Elmar Nurmemmedov,<sup>‡</sup> Philip C. Bourne,<sup>§</sup> Jian-Xing Ma,<sup>‡</sup> and Adam S. Duerfeldt<sup>\*†,§</sup>

<sup>†</sup>*Institute for Natural Products Applications and Research Technologies and* <sup>§</sup>*Department of Chemistry & Biochemistry, University of Oklahoma, 101 Stephenson Parkway, Stephenson Life Sciences Research Center, Norman, Oklahoma 73019, United States*

<sup>‡</sup>*Department of Physiology, University of Oklahoma Health Sciences Center, 941 Stanton L. Young Boulevard, Oklahoma City, Oklahoma 73104, United States*

<sup>‡</sup>*John Wayne Cancer Institute & Pacific Neuroscience Institute at Providence Saint John's Health Center, 2200 Santa Monica Boulevard, Santa Monica, California 90404, United States*

**Supporting information** –Two-concentration luciferase data, PPAR $\alpha$  expression and purification, cellular thermal shift western blots, cytotoxicity, *in silico* metabolic predictions, isothermal titration calorimetry thermograms and curve fits, <sup>1</sup>H and <sup>13</sup>C NMR spectra for final compounds, HPLC traces for select leads, and pharmacokinetic data sets.

\*to whom correspondence should be addressed. Department of Chemistry and Biochemistry, University of Oklahoma, 101 Stephenson Parkway, Stephenson Life Sciences Research Center, Norman, Oklahoma 73019. Phone: 1-405-325-2232. Email: [adam.duerfeldt@ou.edu](mailto:adam.duerfeldt@ou.edu).

## Table of Contents

|                                                             |     |
|-------------------------------------------------------------|-----|
| PPAR $\alpha$ Luciferase Two-Concentration Assessment ..... | S4  |
| Isothermal Calorimetry.....                                 | S5  |
| PPAR $\alpha$ Expression and Purification.....              | S5  |
| CETSA Western Blot Data .....                               | S6  |
| LDH Cytotoxicity Assay .....                                | S7  |
| <i>In silico</i> Metabolic Predictions .....                | S8  |
| <b>NMR Spectra for Final Compounds</b>                      |     |
| $^1\text{H}$ and $^{13}\text{C}$ NMR Spectra for 4b.....    | S9  |
| $^1\text{H}$ and $^{13}\text{C}$ NMR Spectra for 4b* .....  | S10 |
| $^1\text{H}$ and $^{13}\text{C}$ NMR Spectra for 4c .....   | S11 |
| $^1\text{H}$ and $^{13}\text{C}$ NMR Spectra for 4d.....    | S12 |
| $^1\text{H}$ and $^{13}\text{C}$ NMR Spectra for 4e .....   | S13 |
| $^1\text{H}$ and $^{13}\text{C}$ NMR Spectra for 4f.....    | S14 |
| $^1\text{H}$ and $^{13}\text{C}$ NMR Spectra for 4g.....    | S15 |
| $^1\text{H}$ and $^{13}\text{C}$ NMR Spectra for 4h.....    | S16 |
| $^1\text{H}$ and $^{13}\text{C}$ NMR Spectra for 4i.....    | S17 |
| $^1\text{H}$ and $^{13}\text{C}$ NMR Spectra for 4j.....    | S18 |
| $^1\text{H}$ and $^{13}\text{C}$ NMR Spectra for 4k.....    | S19 |
| $^1\text{H}$ and $^{13}\text{C}$ NMR Spectra for 4l.....    | S20 |
| $^1\text{H}$ and $^{13}\text{C}$ NMR Spectra for 4m.....    | S21 |
| $^1\text{H}$ and $^{13}\text{C}$ NMR Spectra for 4n.....    | S22 |
| $^1\text{H}$ and $^{13}\text{C}$ NMR Spectra for 4o .....   | S23 |
| $^1\text{H}$ and $^{13}\text{C}$ NMR Spectra for 4p.....    | S24 |
| $^1\text{H}$ and $^{13}\text{C}$ NMR Spectra for 4q.....    | S25 |
| $^1\text{H}$ and $^{13}\text{C}$ NMR Spectra for 4r .....   | S26 |
| $^1\text{H}$ and $^{13}\text{C}$ NMR Spectra for 4s.....    | S27 |
| $^1\text{H}$ and $^{13}\text{C}$ NMR Spectra for 4t.....    | S28 |
| $^1\text{H}$ and $^{13}\text{C}$ NMR Spectra for 4u .....   | S29 |
| $^1\text{H}$ and $^{13}\text{C}$ NMR Spectra for 4v .....   | S30 |
| $^1\text{H}$ and $^{13}\text{C}$ NMR Spectra for 4w .....   | S31 |
| $^1\text{H}$ and $^{13}\text{C}$ NMR Spectra for 4x .....   | S32 |

|                                                                   |            |
|-------------------------------------------------------------------|------------|
| <b><sup>1</sup>H and <sup>13</sup>C NMR Spectra for 4y .....</b>  | <b>S33</b> |
| <b><sup>1</sup>H and <sup>13</sup>C NMR Spectra for 4z .....</b>  | <b>S34</b> |
| <b><sup>1</sup>H and <sup>13</sup>C NMR Spectra for 5a .....</b>  | <b>S35</b> |
| <b><sup>1</sup>H and <sup>13</sup>C NMR Spectra for 5b .....</b>  | <b>S36</b> |
| <b><sup>1</sup>H and <sup>13</sup>C NMR Spectra for 5b* .....</b> | <b>S37</b> |
| <b><sup>1</sup>H and <sup>13</sup>C NMR Spectra for 5f .....</b>  | <b>S38</b> |
| <b><sup>1</sup>H and <sup>13</sup>C NMR Spectra for 19a .....</b> | <b>S39</b> |
| <b><sup>1</sup>H and <sup>13</sup>C NMR Spectra for 19b .....</b> | <b>S40</b> |
| <b><sup>1</sup>H and <sup>13</sup>C NMR Spectra for 19c .....</b> | <b>S41</b> |
| <b><sup>1</sup>H and <sup>13</sup>C NMR Spectra for 19d .....</b> | <b>S42</b> |
| <b><sup>1</sup>H and <sup>13</sup>C NMR Spectra for 19e .....</b> | <b>S43</b> |
| <b><sup>1</sup>H and <sup>13</sup>C NMR Spectra for 19f .....</b> | <b>S44</b> |
| <b><sup>1</sup>H and <sup>13</sup>C NMR Spectra for 20 .....</b>  | <b>S45</b> |
| <b><sup>1</sup>H and <sup>13</sup>C NMR Spectra for 21 .....</b>  | <b>S46</b> |
| <b><sup>1</sup>H and <sup>13</sup>C NMR Spectra for 22 .....</b>  | <b>S47</b> |
| <b><sup>1</sup>H and <sup>13</sup>C NMR Spectra for 23 .....</b>  | <b>S48</b> |
| <b><sup>1</sup>H and <sup>13</sup>C NMR Spectra for 24 .....</b>  | <b>S49</b> |
| <b><sup>1</sup>H and <sup>13</sup>C NMR Spectra for 25 .....</b>  | <b>S50</b> |
| <b><sup>1</sup>H and <sup>13</sup>C NMR Spectra for 26 .....</b>  | <b>S51</b> |
| <b><sup>1</sup>H and <sup>13</sup>C NMR Spectra for 27 .....</b>  | <b>S52</b> |
| <b><sup>1</sup>H and <sup>13</sup>C NMR Spectra for 28 .....</b>  | <b>S53</b> |
| <b><sup>1</sup>H and <sup>13</sup>C NMR Spectra for 29 .....</b>  | <b>S54</b> |
| <b><sup>1</sup>H and <sup>13</sup>C NMR Spectra for 30 .....</b>  | <b>S55</b> |
| <b><sup>1</sup>H and <sup>13</sup>C NMR Spectra for 31 .....</b>  | <b>S56</b> |
| <b><sup>1</sup>H and <sup>13</sup>C NMR Spectra for 32 .....</b>  | <b>S57</b> |
| <b><sup>1</sup>H and <sup>13</sup>C NMR Spectra for 33 .....</b>  | <b>S58</b> |
| <b>HPLC Traces for Key Analogues .....</b>                        | <b>S59</b> |
| <b>Pharmacokinetic Data (Eurofins) .....</b>                      | <b>S62</b> |

# PPARα LUCIFERASE TWO-CONCENTRATION ASSESSMENT

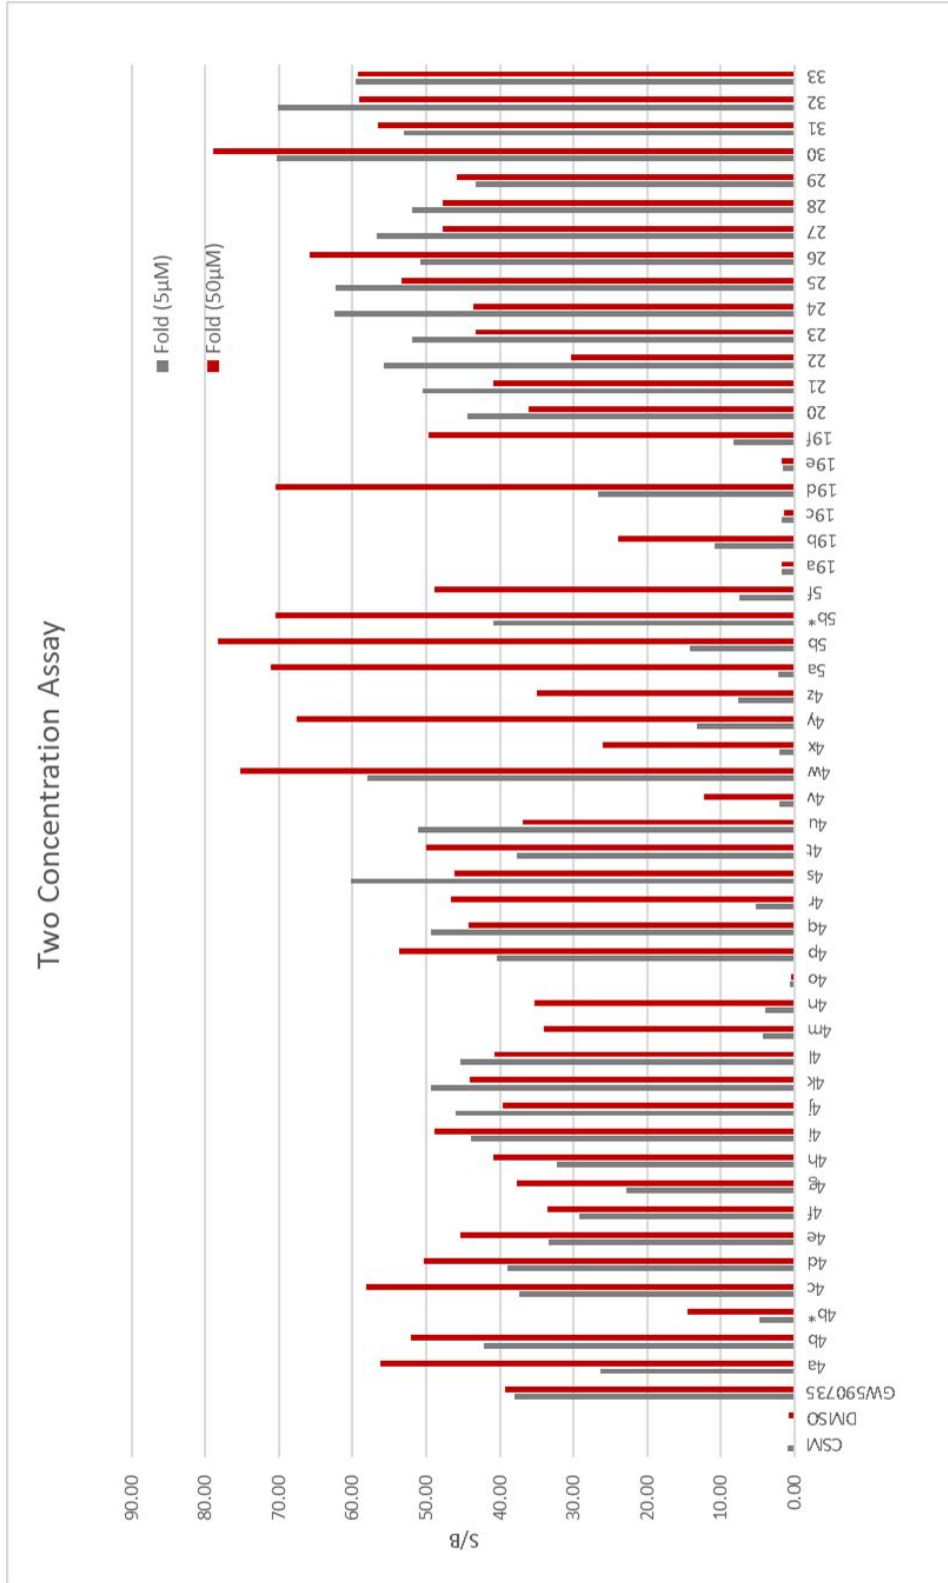

**Figure 1. Initial two-concentration assessment of 4a-4z, 5a, 5b, 5b\*, 5f, 20a-20f, and 21-34 for PPARα agonism in a luciferase-based cellular assay (Indigo).** Results presented from a single experiment as mean signal/mean background (S/B). GW590735 was evaluated at 5 μM and 40 μM due to observed cytotoxicity at higher concentrations.

## ISOTHERMAL CALORIMETRY

ITC experiments were performed using a MicroCal PEAQ ITC (MicroCal Inc., Northampton, MA, USA). PPAR $\alpha$  was concentrated down to a final concentration of 3.27 mg/mL using an Amicon Ultra-15 centrifugal concentrator (Millipore). Buffer (20 mM HEPES, 150 mM NaCl, pH 7.4) was used to dilute the ligand stock solution (10, 12.5, or 25 mM in DMSO). DMSO was added to the protein solution at the same percentage (0.8-10%) of the ligand solution. Samples were centrifuged before the experiment to eliminate possible aggregates. The protein solution (30-85  $\mu$ M) was placed in the sample cell, and the ligand solution (2.3-15 times more concentrated than the protein) was loaded into the syringe injector. The detailed experimental parameters are shown below. The titrations involved 19 injections of 2  $\mu$ L at 150 s intervals or 13 injections of 3  $\mu$ L at 150 s intervals. The experiment was set at 25  $^{\circ}$ C and the syringe stirring speed was set at 750 rpm. Titration of ligand at same concentration into buffer with same percentage DMSO were used as a reference control. The thermodynamic data were processed with MicroCal PEAQ-ITC Analysis Software provided by Malvern. The one-site binding model was selected to calculate the value of the dissociation constant ( $K_d$ ), the enthalpy ( $\Delta H$ ), the binding free energy ( $\Delta G$ ), and the entropy ( $-T\Delta S$ ).

| Ligand          | [PPAR $\alpha$ ] $\mu$ M | [Ligand] nM | DMSO% (v/v) |
|-----------------|--------------------------|-------------|-------------|
| <b>4a (A91)</b> | 85                       | 0.2         | 0.8%        |
| <b>4b</b>       | 60                       | 0.5         | 2%          |
| <b>4u</b>       | 30                       | 0.25        | 2%          |
| <b>GW590735</b> | 80                       | 0.5         | 2%          |

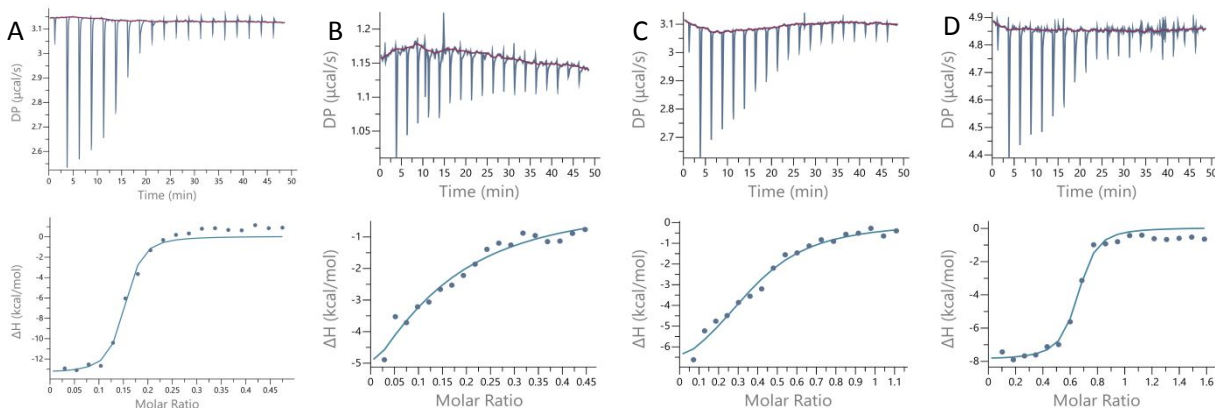

**Figure S2. Isothermal titration calorimetry thermograms of select ligands to PPAR $\alpha$ -LBD.** The upper panel shows the raw data of a representative ITC experiment. The lower panel shows the corresponding binding isotherm fit according to the “one binding site” model. A) GW590735; B) compound **4a**; C) compound **4b**; and D) compound **4u**

## PROTEIN EXPRESSION, PURIFICATION

Protein was expressed from the pET28c vector (Novagen) in *Escherichia coli* strain Rosetta<sup>TM</sup> (DE3) grown in LB media to an OD of 0.6 and then induced with 1 mM IPTG for 20 h at 18  $^{\circ}$ C. Cells were harvested and resuspended in Buffer A (20 mM Tris, 150 mM NaCl, 5% glycerol, 5 mM imidazole, pH 8.0) at 5 ml/g pellet weight. Cultures were lysed using an Emulsiflex C-3 homogenizer (Avestin), and the lysate clarified by centrifugation (22,000  $\times$  g, 40 min). The supernatant was loaded onto a 5ml HisTrap FF Crude column (GE Life Sciences) and eluted with a linear gradient of 5-500 mM imidazole over 20 column volumes. Fractions containing PPAR $\alpha$  were identified by sodium dodecyl sulfate–polyacrylamide gel electrophoresis analysis. The His-Tag was removed by thrombin cleavage (10 U thrombin/mg) dialyzed overnight at 4  $^{\circ}$ C against buffer B (20 mM Tris, 150 mM NaCl, 5% glycerol, pH 8.0). The uncleaved protein was removed by reloading the sample onto the 5 ml HisTrap FF Crude column (GE Life Sciences). The flow through was concentrated to a final volume of 5 ml using an Amicon Ultra-15 centrifugal concentrator (Millipore),

and loaded on to a HiLoad Superdex 200PG size exclusion chromatography column (GE Life Sciences) pre-equilibrated with Buffer C (20 mM HEPES, 150 mM NaCl, pH 7.4).

**CETSA DATA**

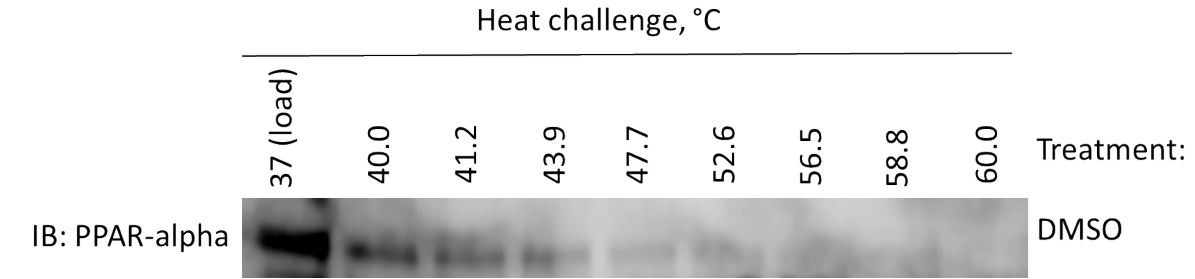

**Figure S3. Melting profile of hPPAR $\alpha$ .** MIO-M1 cells were subjected to a heat gradient to determine the thermal melting profile of hPPAR $\alpha$ . Band intensity of remaining stable protein at each temperature was quantified, and subsequently the temperature of aggregation ( $T_{agg,50}$  and  $T_{agg,75}$ ) was determined as 40.8 °C and 45.5 °C, respectively.

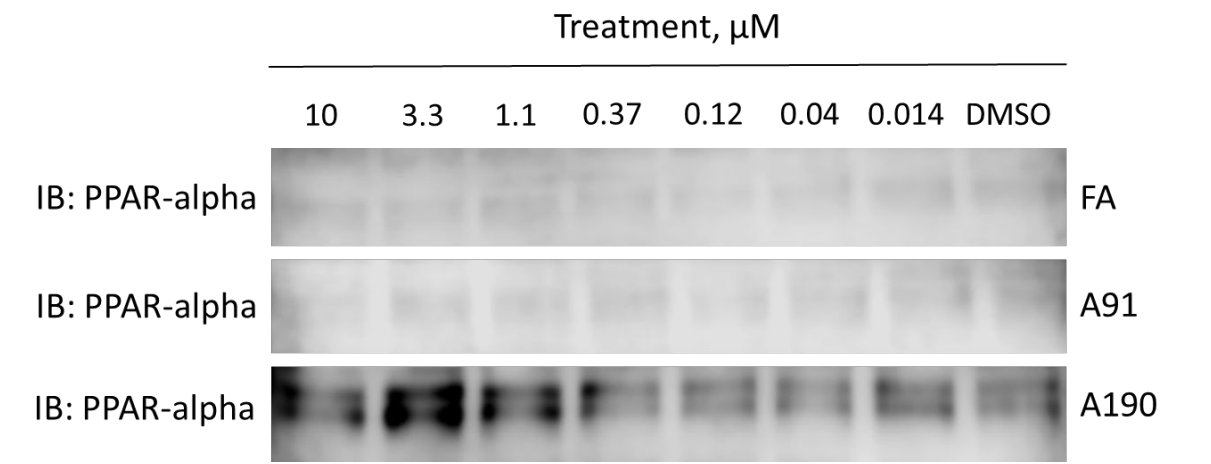

**Figure S4. Dose-response CETSA at 45.5 °C.** MIO-M1 cells treated with increasing doses of inhibitors were subjected to heat challenge at  $T_{agg,75}$  of 45.5 °C. Band intensity of remaining stabilized protein at each dose was quantified, and subsequently the  $EC_{50}$  for each inhibitor was determined.

## LDH Cytotoxicity Data

661W mouse photoreceptor cells were cultured on 96-well plate (6700 cells per well) with varying concentrations of DMSO, GW7647, or A91 (0 to 200  $\mu\text{M}$ ) to induce cytotoxicity. Following overnight incubation with the compounds, culture media from the 96-well plate was collected for the LDH quantification assay, which performed following the manufacturer's instructions (Thermo Scientific, #88953). In short, 50  $\mu\text{L}$  of culture medium was mixed and incubated with 50  $\mu\text{L}$  of Reaction Mixture at 25  $^{\circ}\text{C}$  for 30 minutes. 50  $\mu\text{L}$  of Stop Solution was added and the absorbance was measured at 490 nm and 680 nm. Cell death (percentage of maximum LDH release control) was then determined following the manufacturer's protocols.

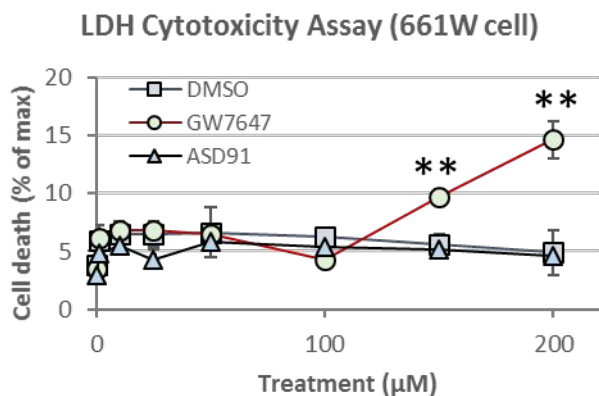

Figure S5. Cytotoxicity of A91 in a retinal epithelium photoreceptor cell-line 661W. LDH activities were measured to determine dose-dependent cytotoxicity of ASD091. No significant LDH activities were detected in all concentrations of ASD091 tested, whereas GW7647 began to induce cell death 150  $\mu\text{M}$  (mean  $\pm$  SD;  $n=3$ ).  $**P<0.01$ .

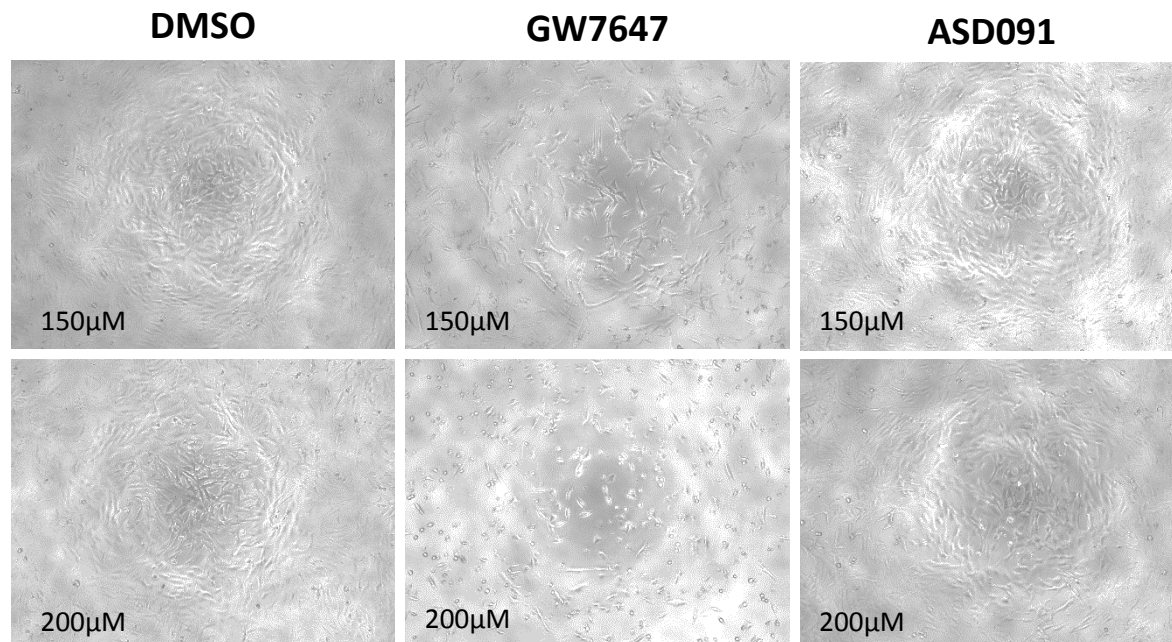

Figure S6. Cellular morphology after compound treatment under light microscopy. Unlike GW7647, ASD091-treated cells did not exhibit any obvious signs of cellular morphology changes at all concentrations tested.

## In silico Metabolic Predictions

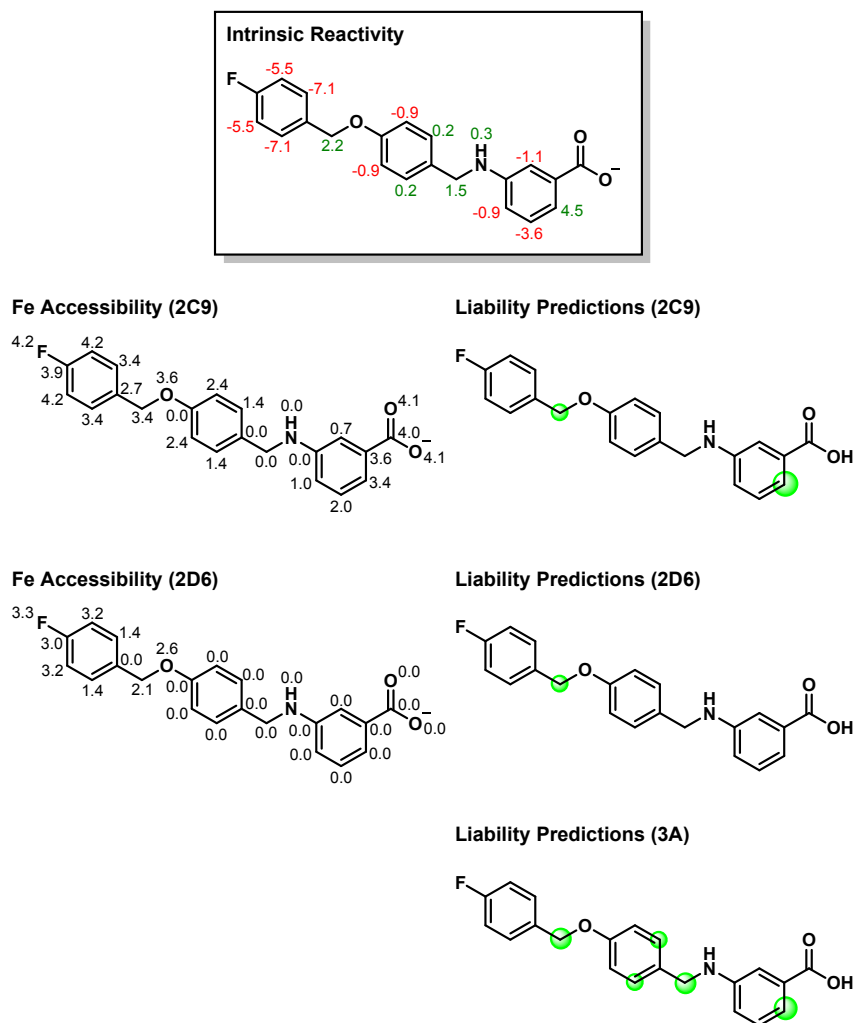

**Figure S7.** *In silico* metabolic predictions determined by Schrodinger's P450 Site of Metabolism Module. Predictions calculated for **4b** against 2C9, 2D6, and 3A4 CYPs. Components are described as transcribed directly from the manufacturer's manual. **Intrinsic Reactivity** = atoms are labeled with the intrinsic reactivity calculated with Hammett and Taft methodology. Positive values are predicted to be more reactive, negative values are predicted to be less reactive. **Fe Accessibility** = atoms are labeled with accessibility to the iron. This is defined as the natural logarithm of the number of poses for the atom in which the atom was within 5 Å of Fe. Larger values indicate greater accessibility. **Liability Predictions** = linear combination of the accessibility and the intrinsic reactivity. Results are displayed as green circles, in which the radius is proportional to the score. Larger circles mean higher reactivity.





4b\*

DN-3-277P-i\_PROTON\_01  
DN-3-277P-i

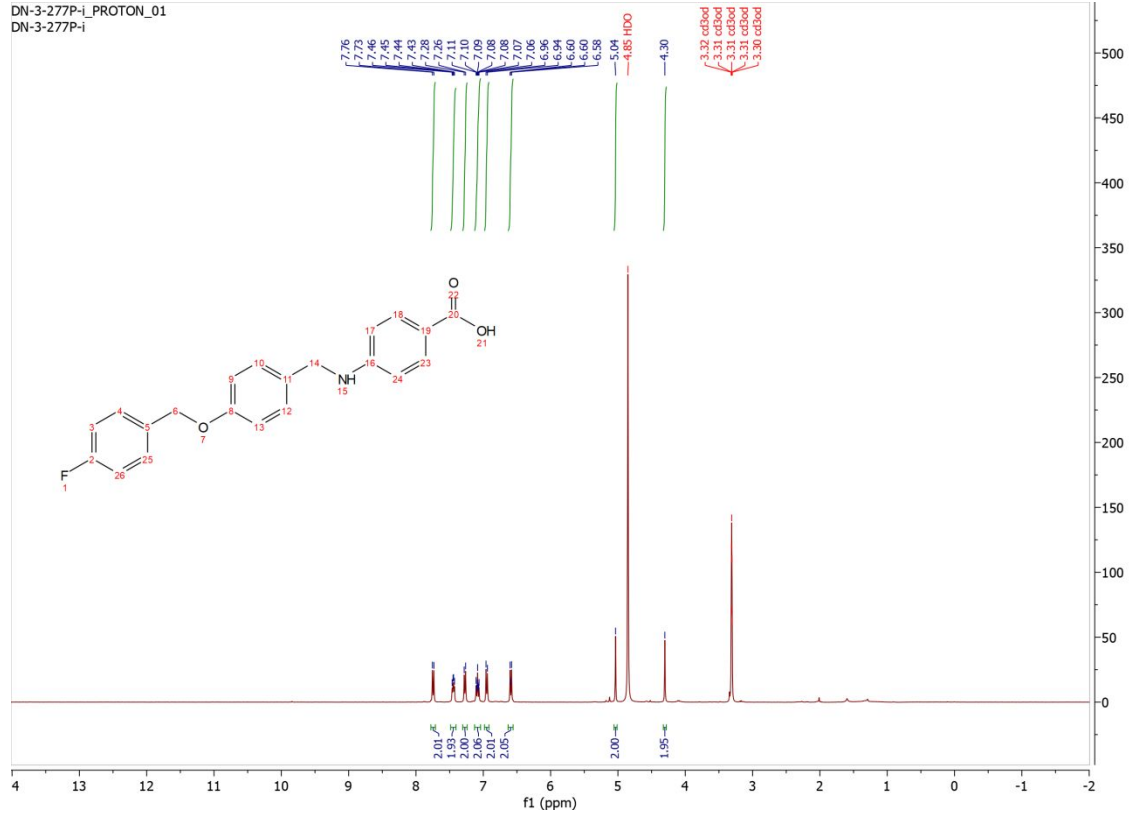

DN-3-277P-i\_CARBON\_01  
DN-3-277P-i

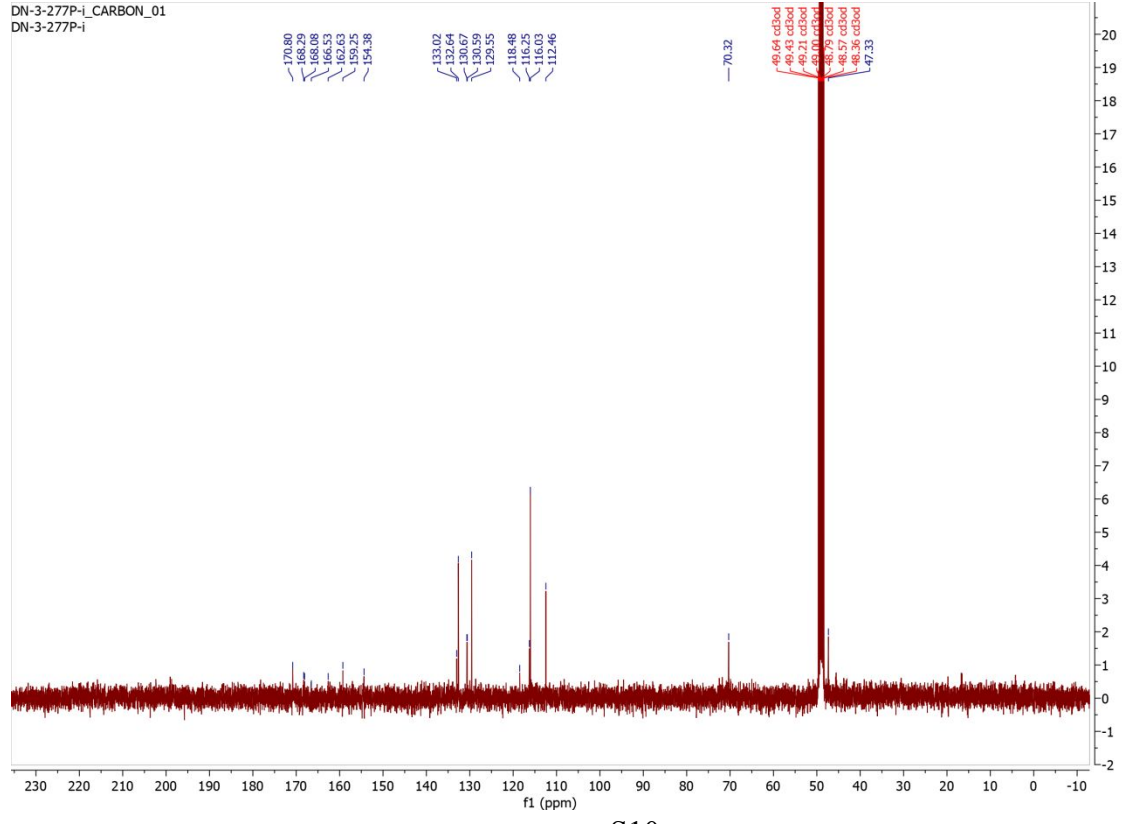





4e

xd\_6\_127\_600\_PROTON\_02  
xd\_6\_127\_600

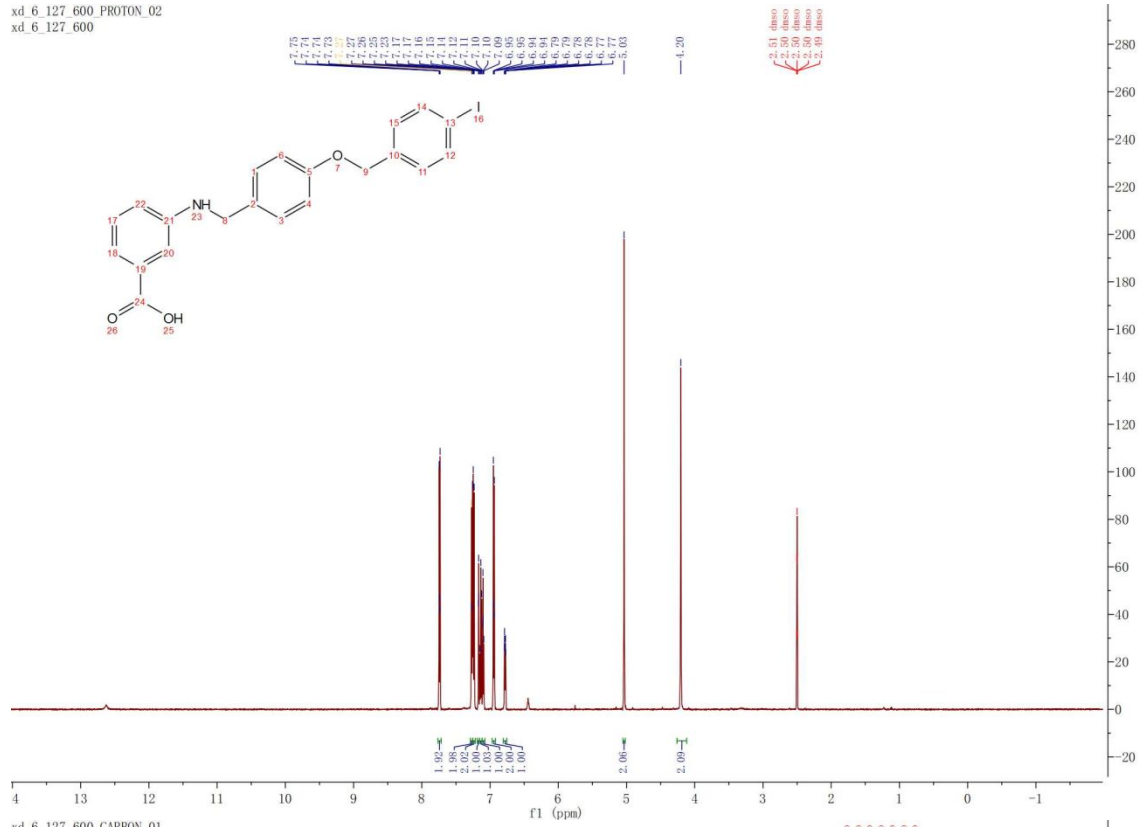

xd\_6\_127\_600\_CARBON\_01  
xd\_6\_127\_600

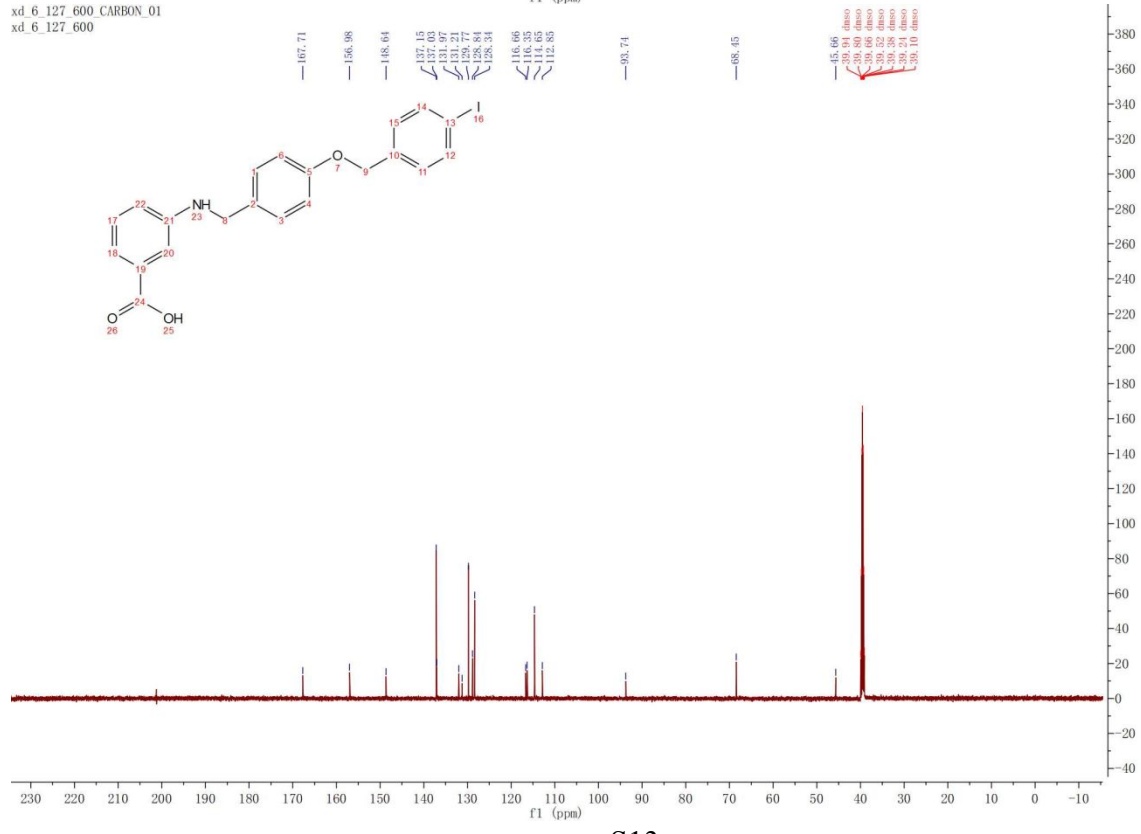



4g

xd\_6\_131\_600\_PROTON\_02  
xd\_6\_131\_600

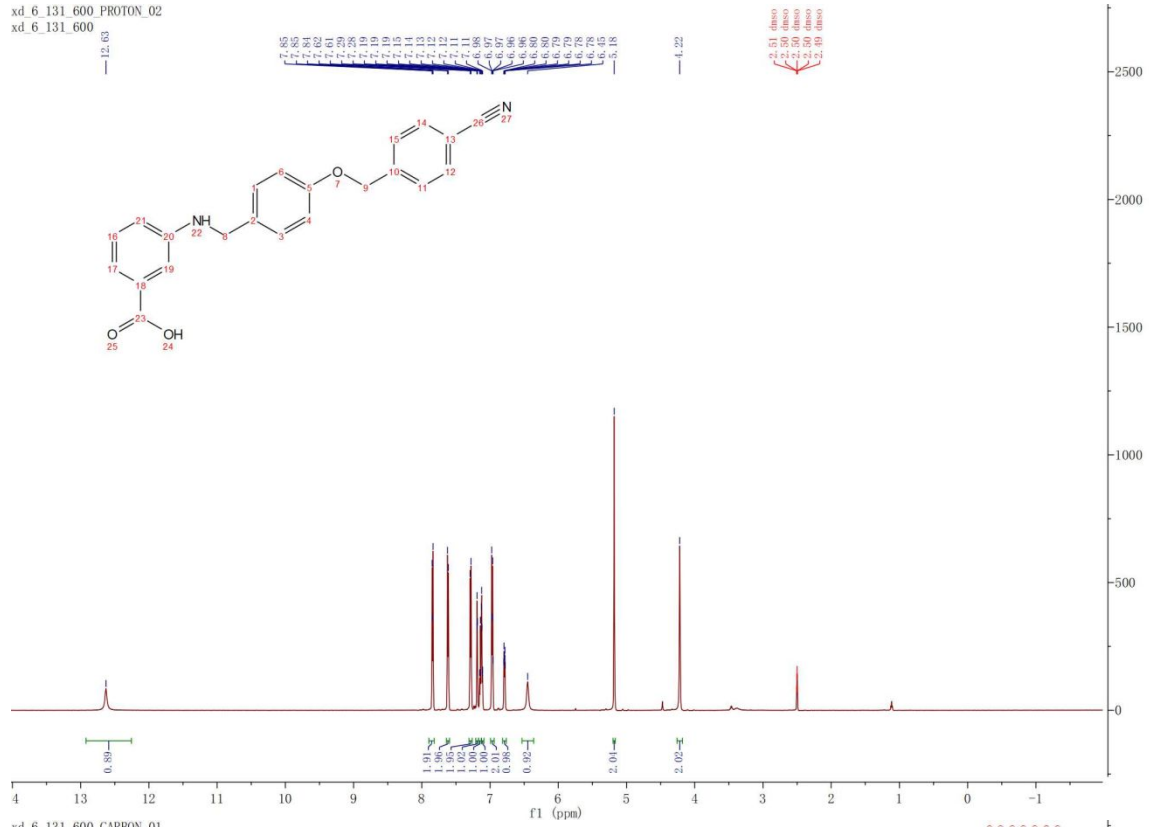

xd\_6\_131\_600\_CARBON\_01  
xd\_6\_131\_600

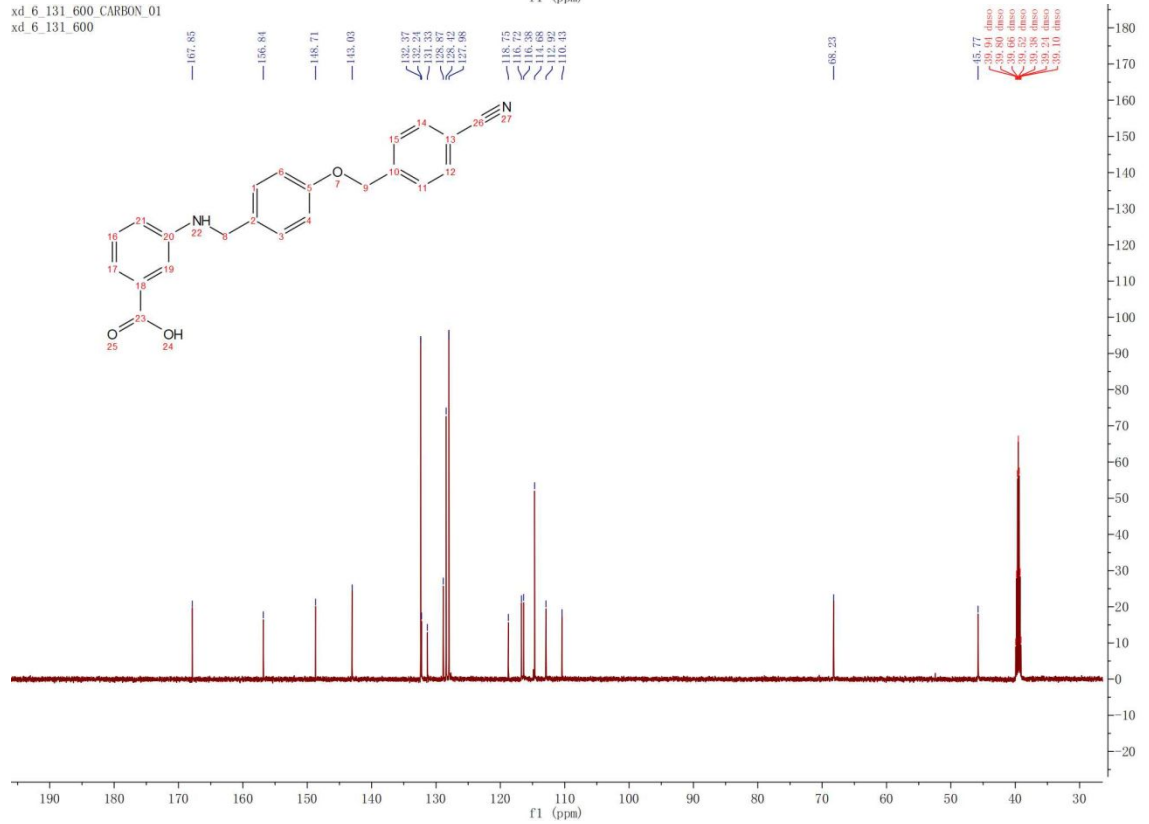

4h

xd\_6\_195 PROTON\_03  
xd\_6\_195

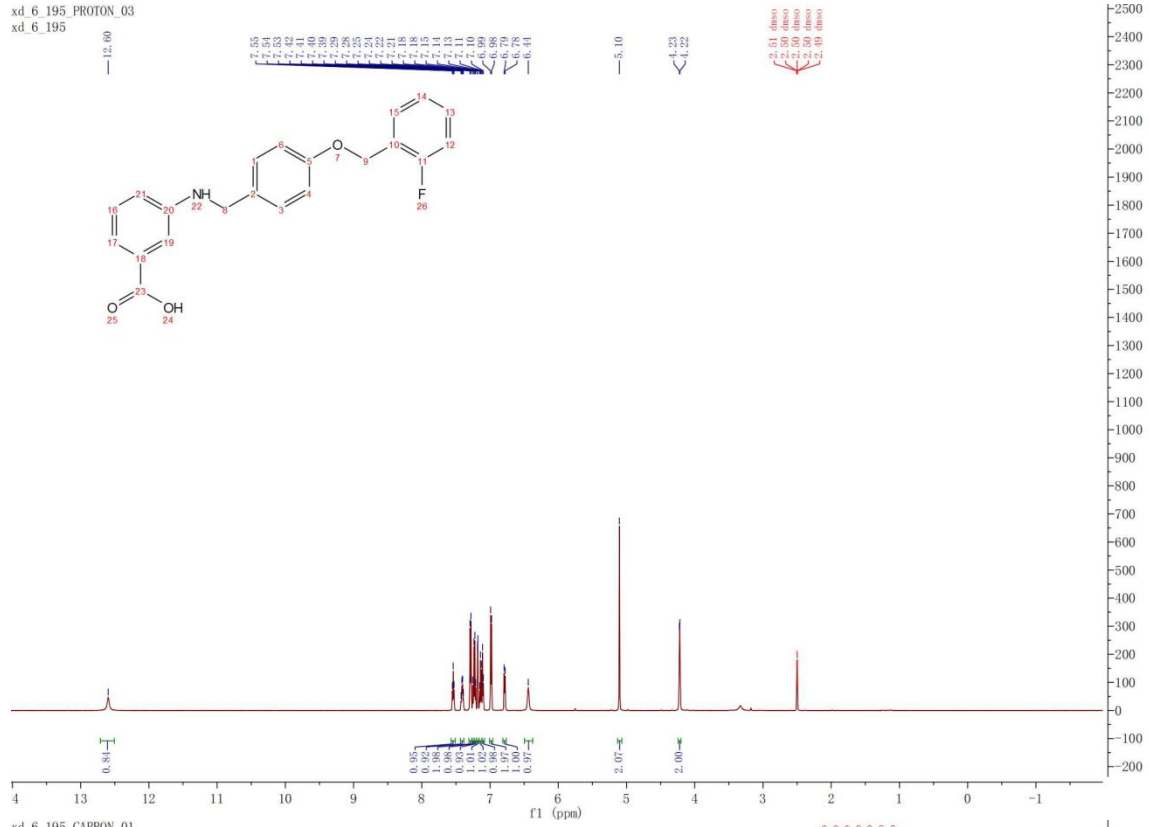

xd\_6\_195 CARBON\_01  
xd\_6\_195

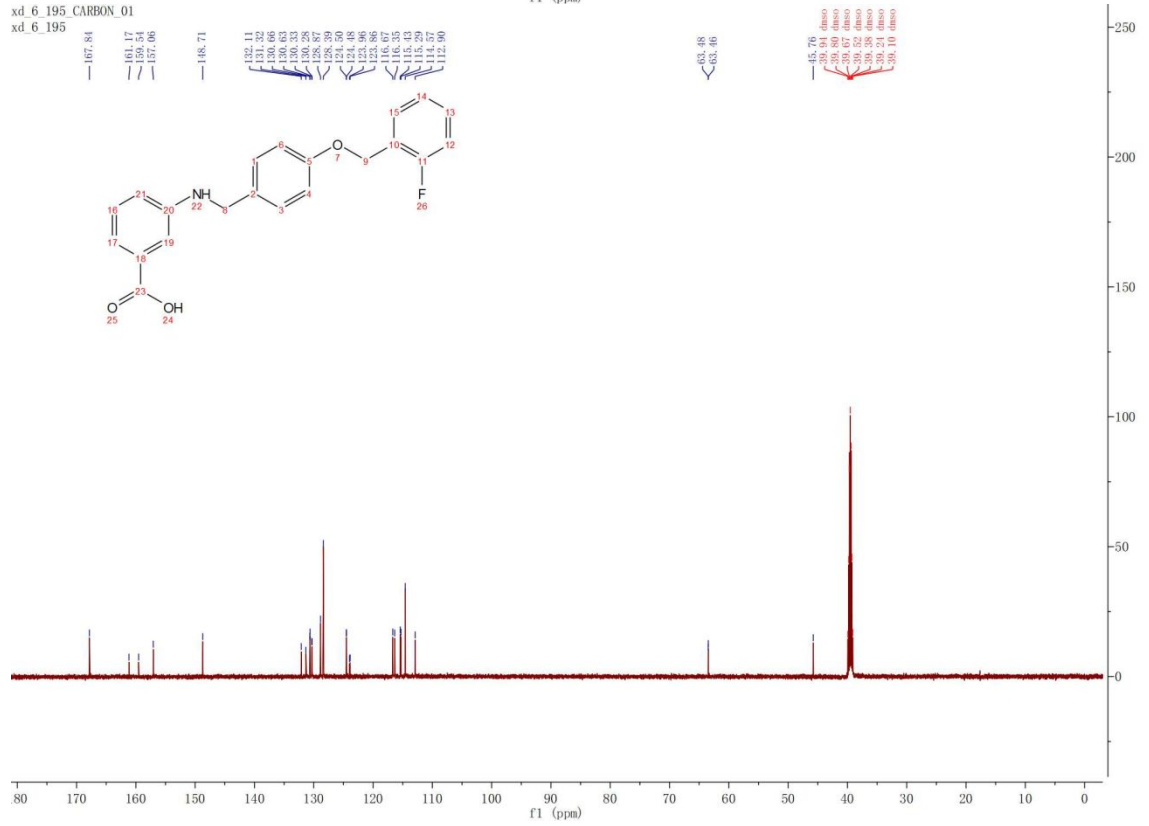



4i

xd\_6\_143\_600 PROTON\_02  
xd\_6\_143\_600

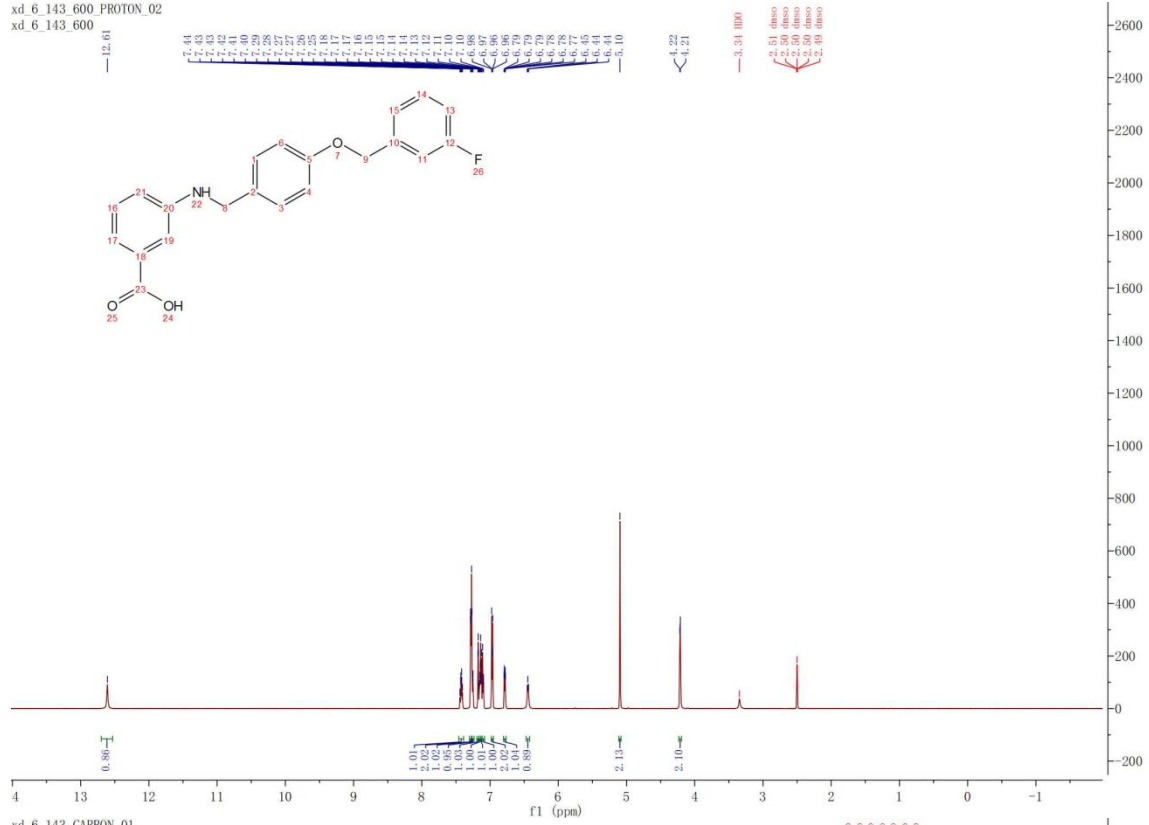

xd\_6\_143 CARBON\_01  
xd\_6\_143

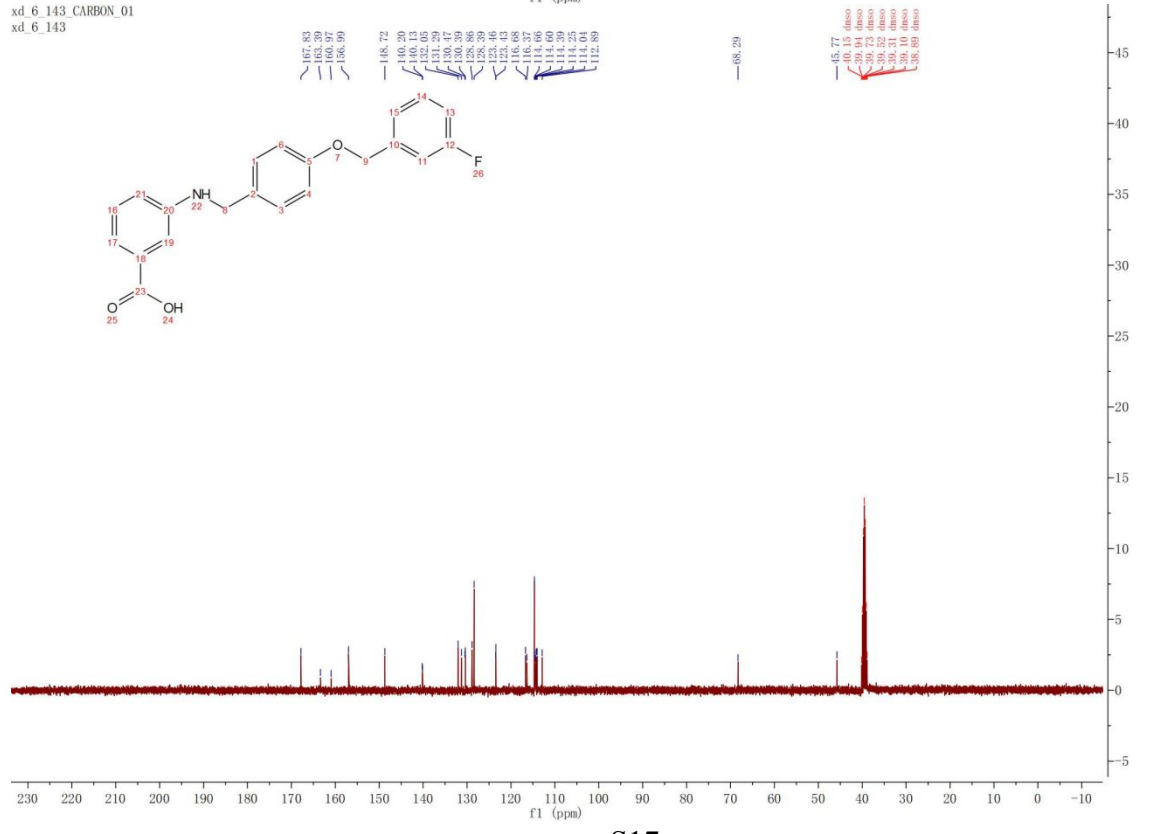





xd\_4\_243 PROTON\_02  
xd\_4\_243

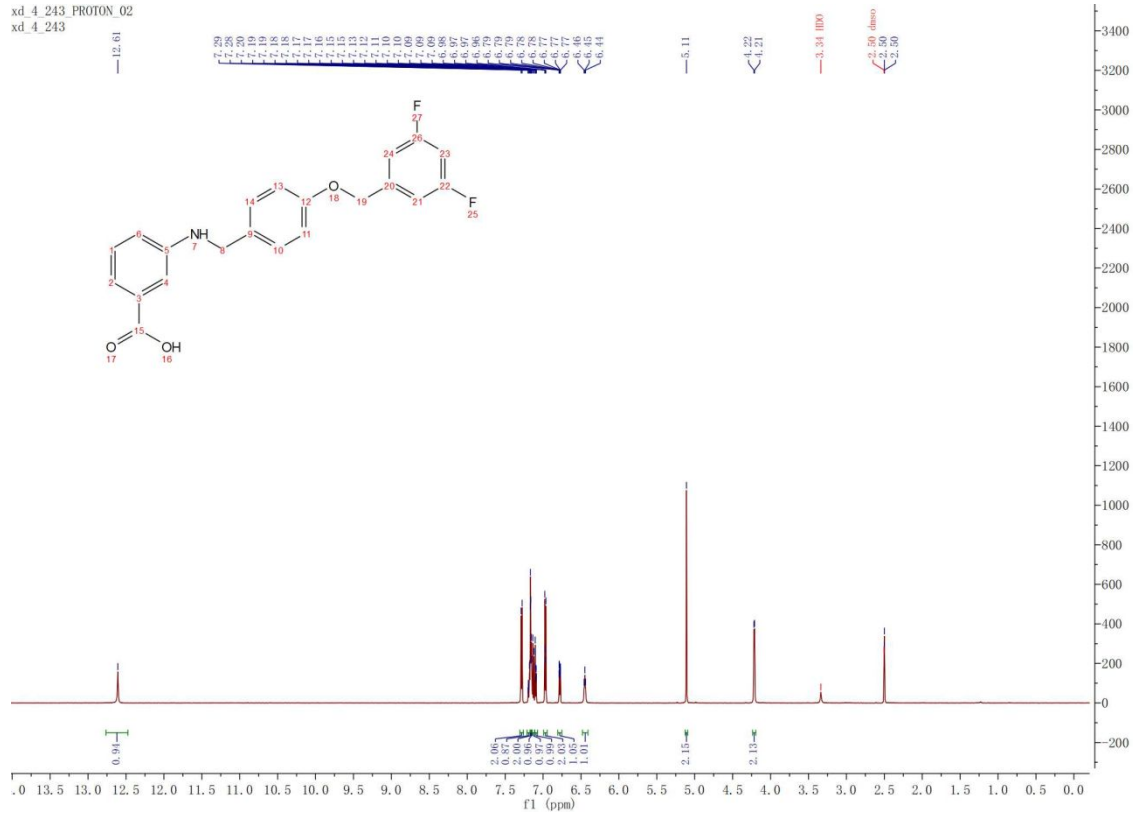

xd\_4\_243 CARBON\_01  
xd\_4\_243

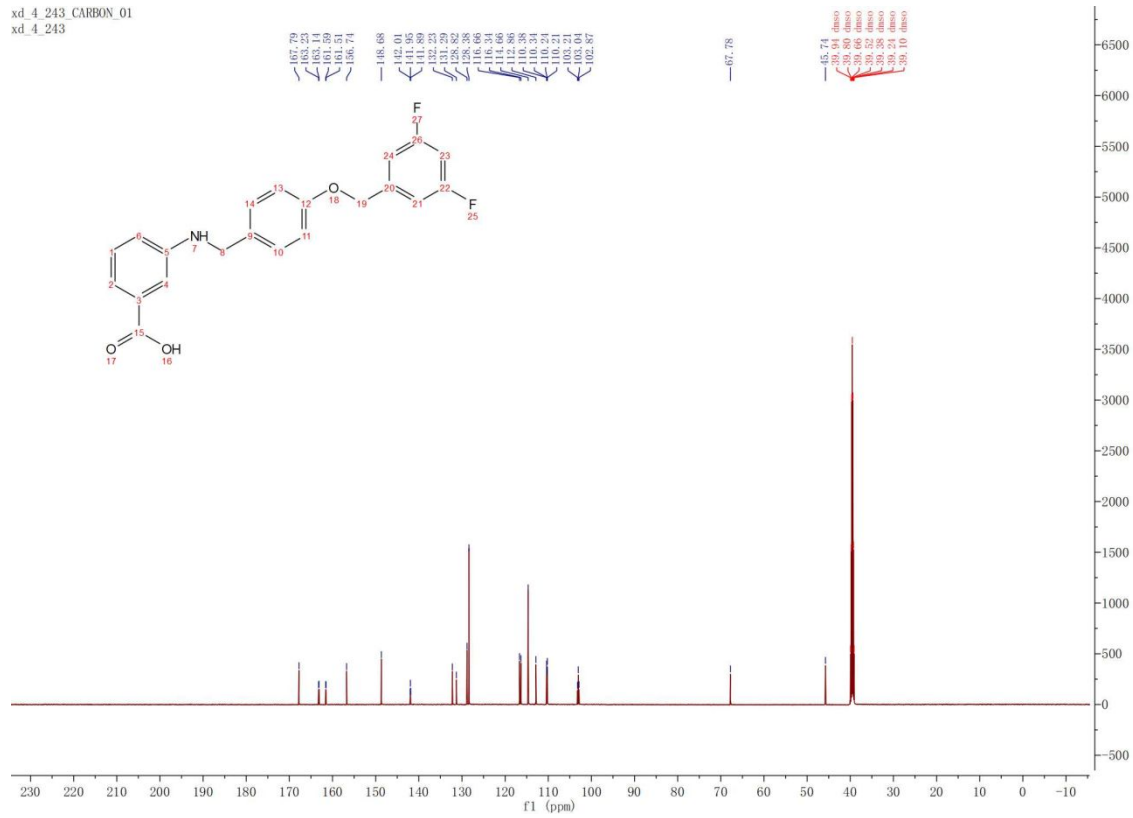

4m

xd\_5\_69\_PROTON\_01  
xd\_5\_69

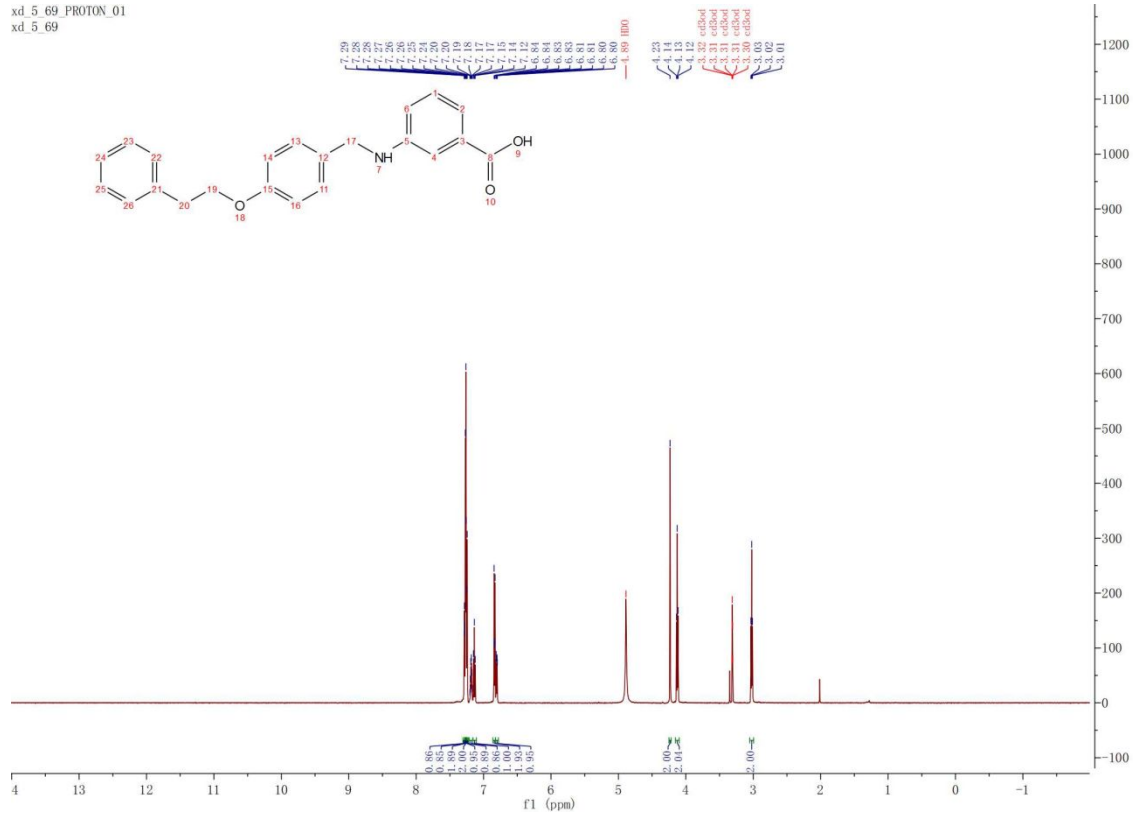

xd\_5\_69\_CARBON\_01  
xd\_5\_69

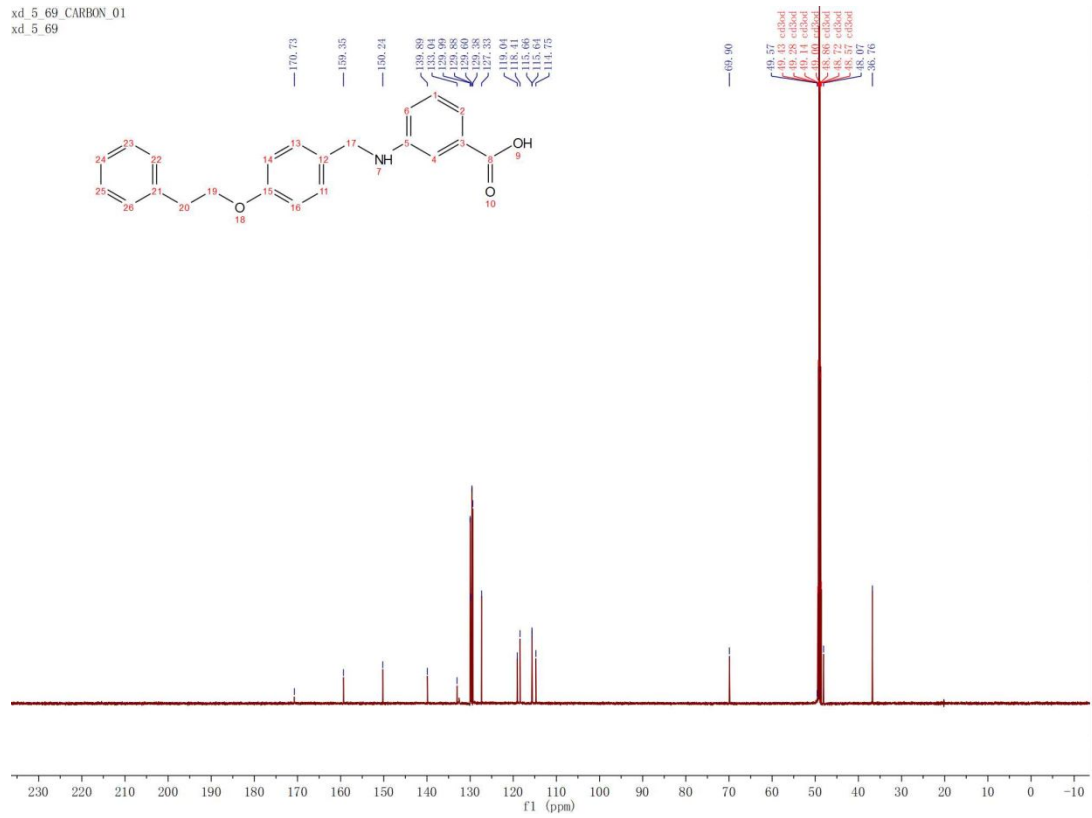



4o

xd\_5\_75\_PROTON\_01  
xd\_5\_75

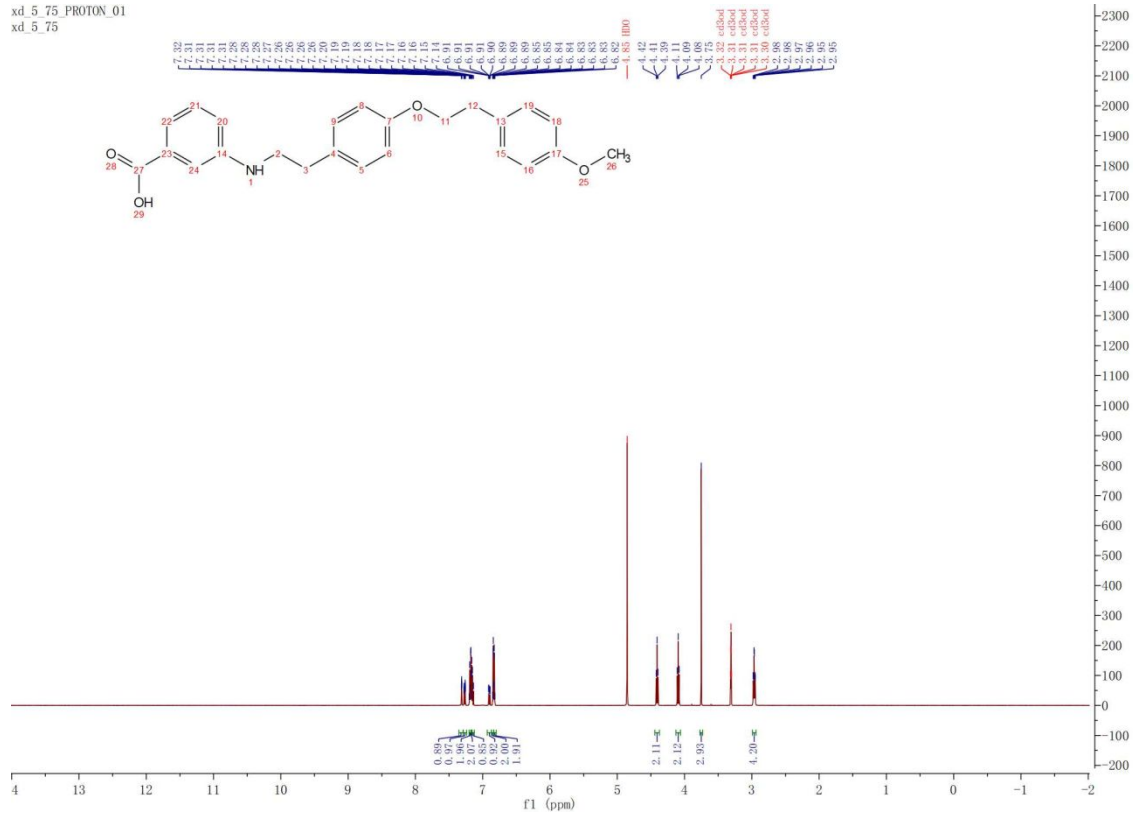

xd\_5\_75\_CARBON\_01  
xd\_5\_75

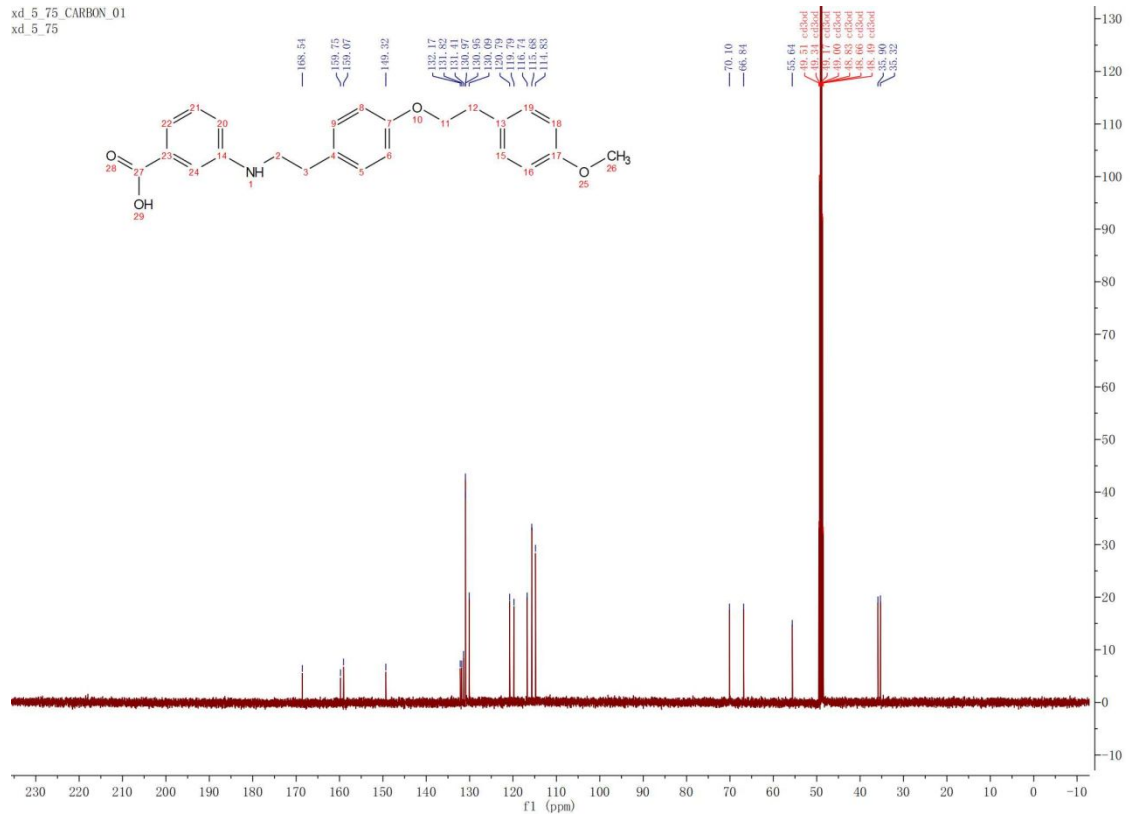

4p

DN-5-15-ii\_PROTON\_01  
DN-5-15-ii

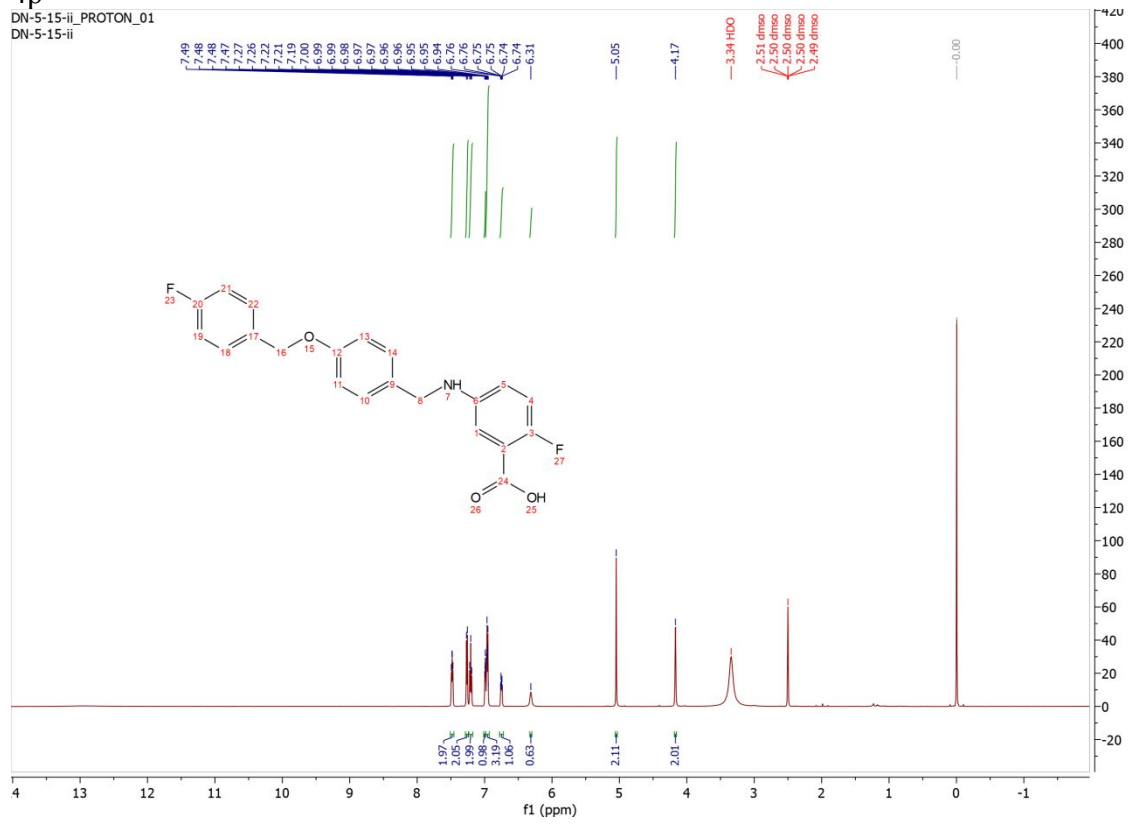

DN-5-15-ii\_CARBON\_01  
DN-5-15-ii

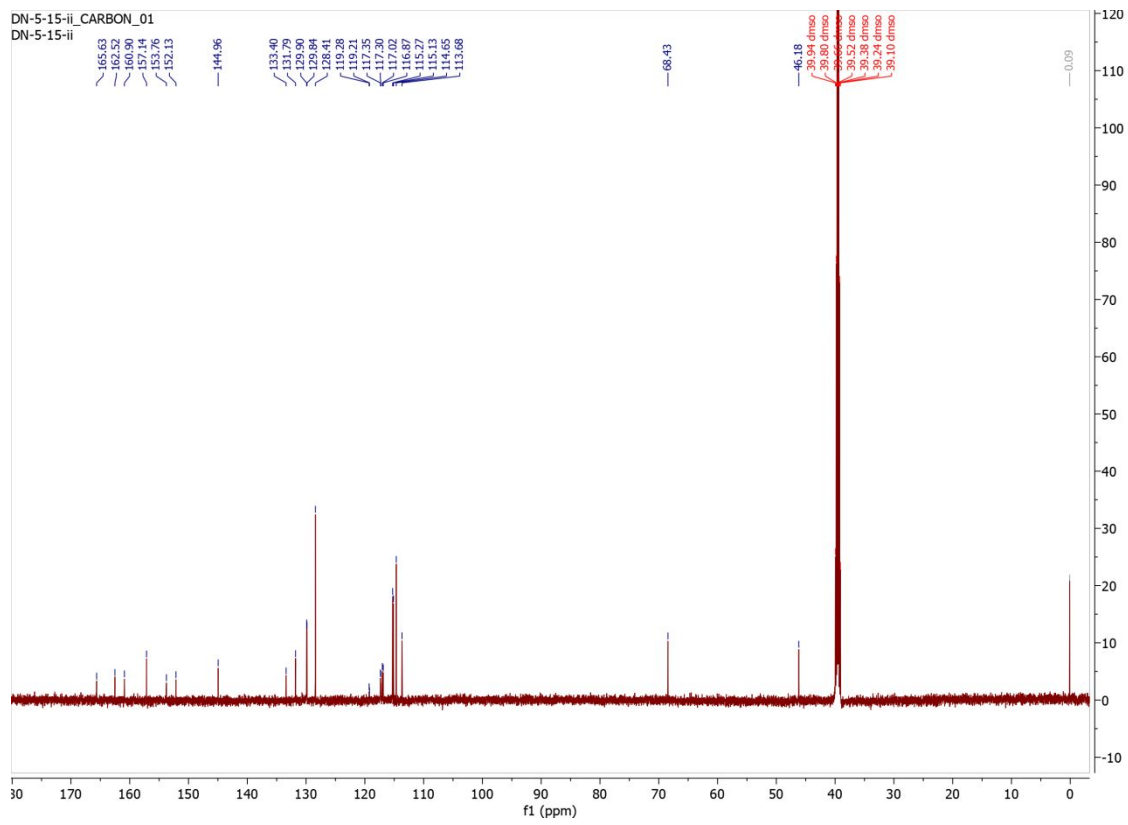



4q

DN-5-91\_PROTON\_01  
DN-5-91

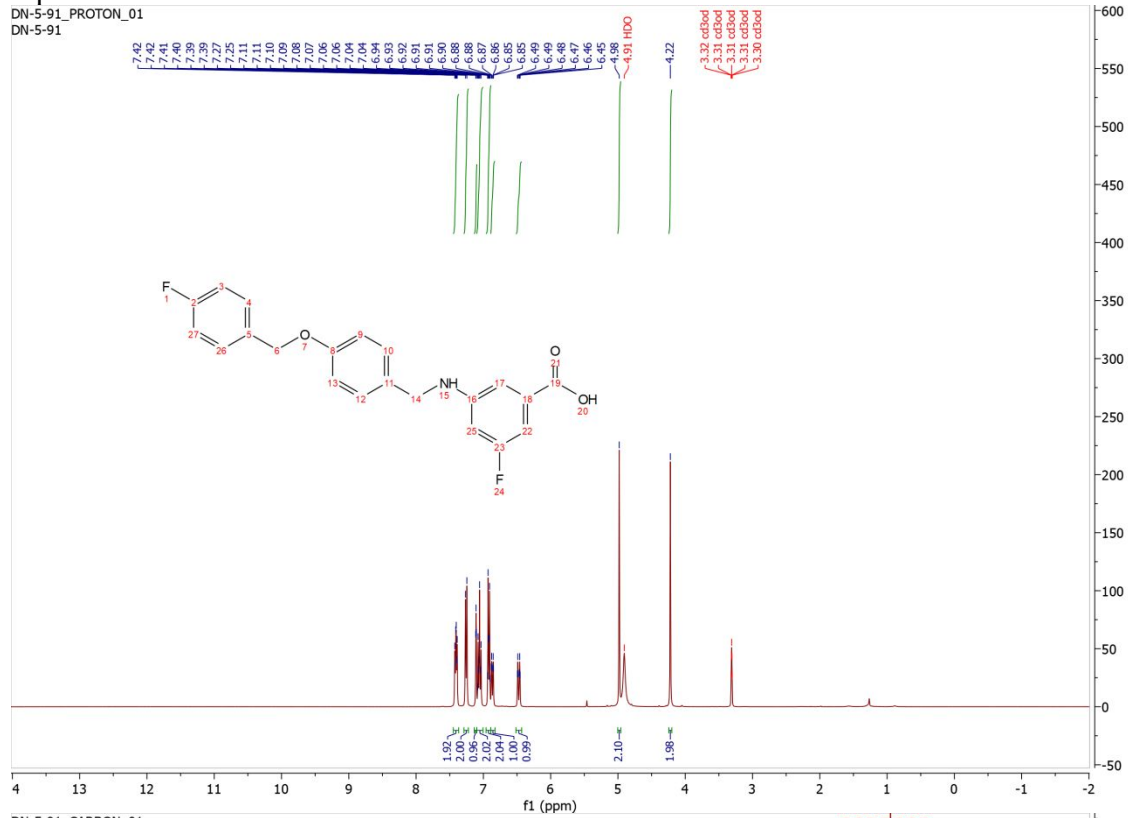

DN-5-91\_CARBON\_01  
DN-5-91

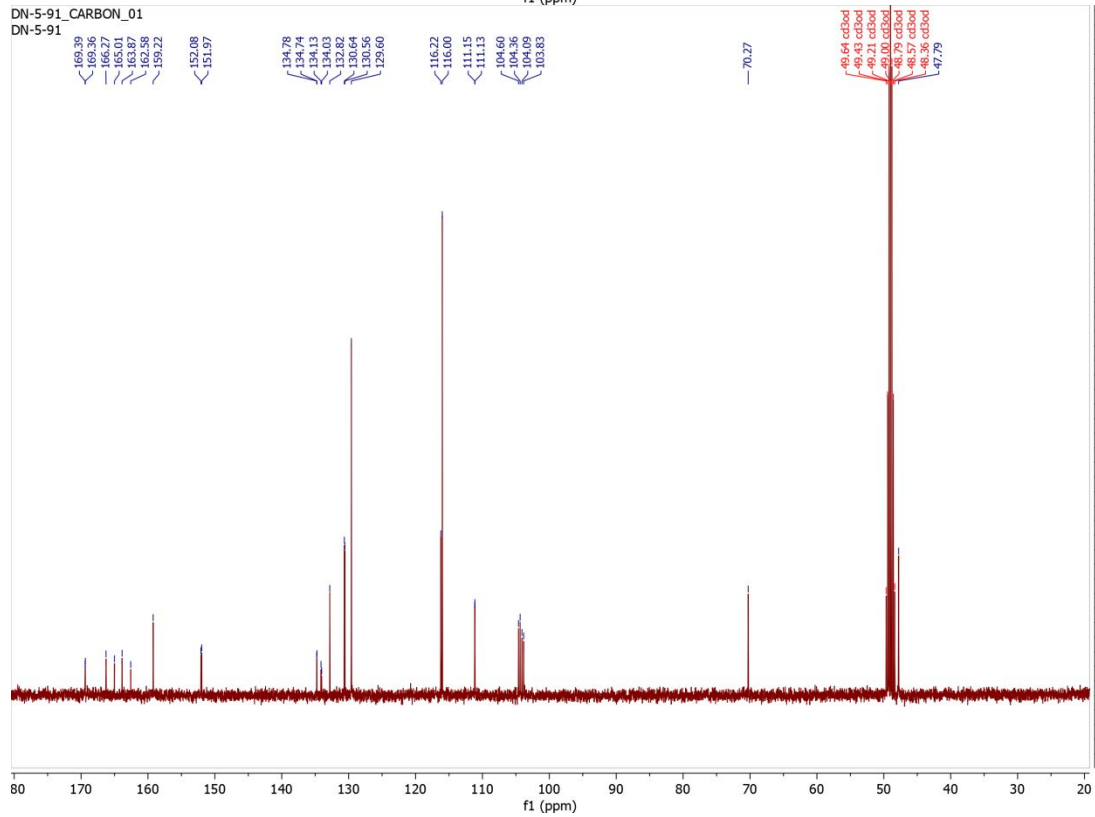

4r

DN-5-43-i\_PROTON\_01  
DN-5-43-i

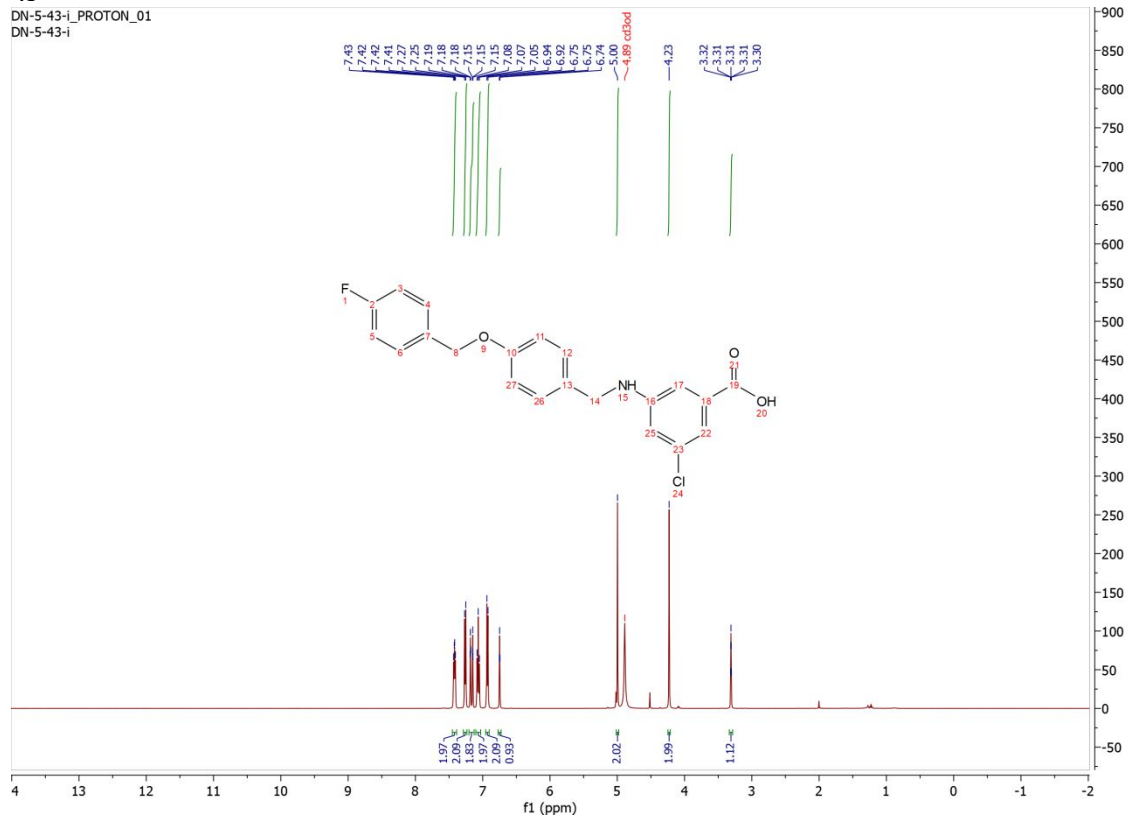

DN-5-43-i CARBON\_01  
DN-5-43-i

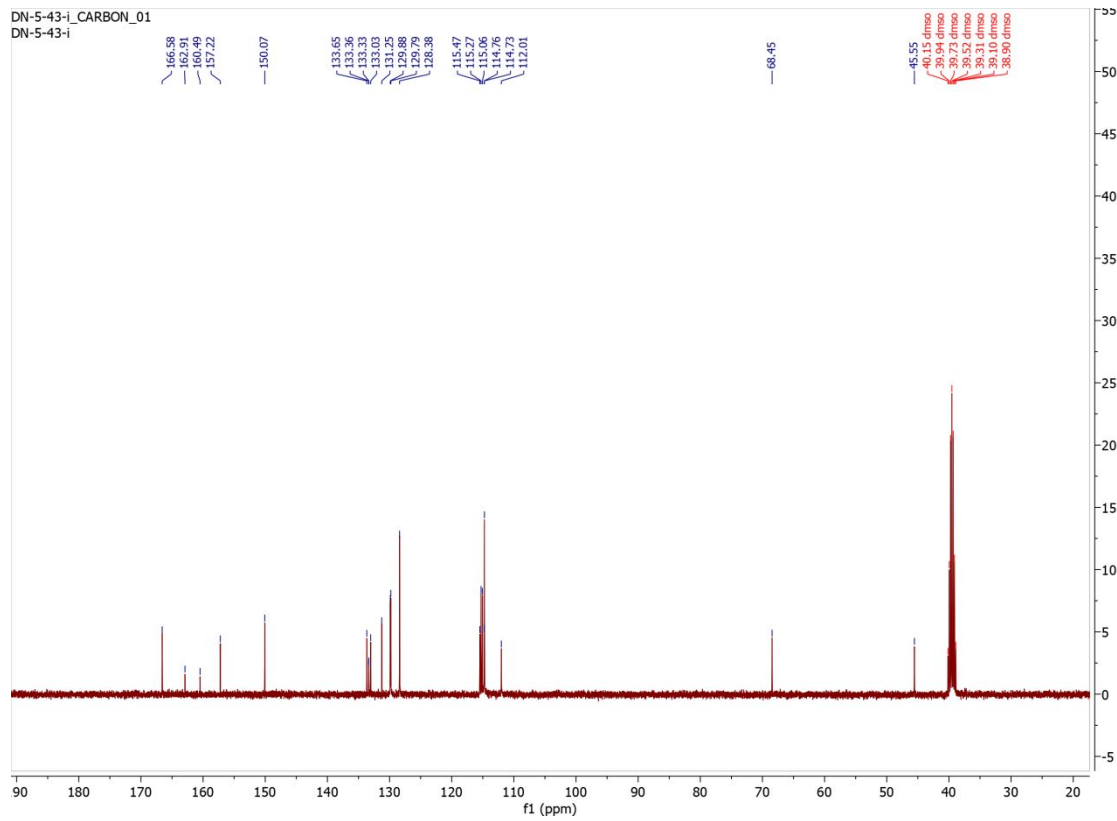

4s

DN-5-89\_PROTON\_01  
DN-5-89

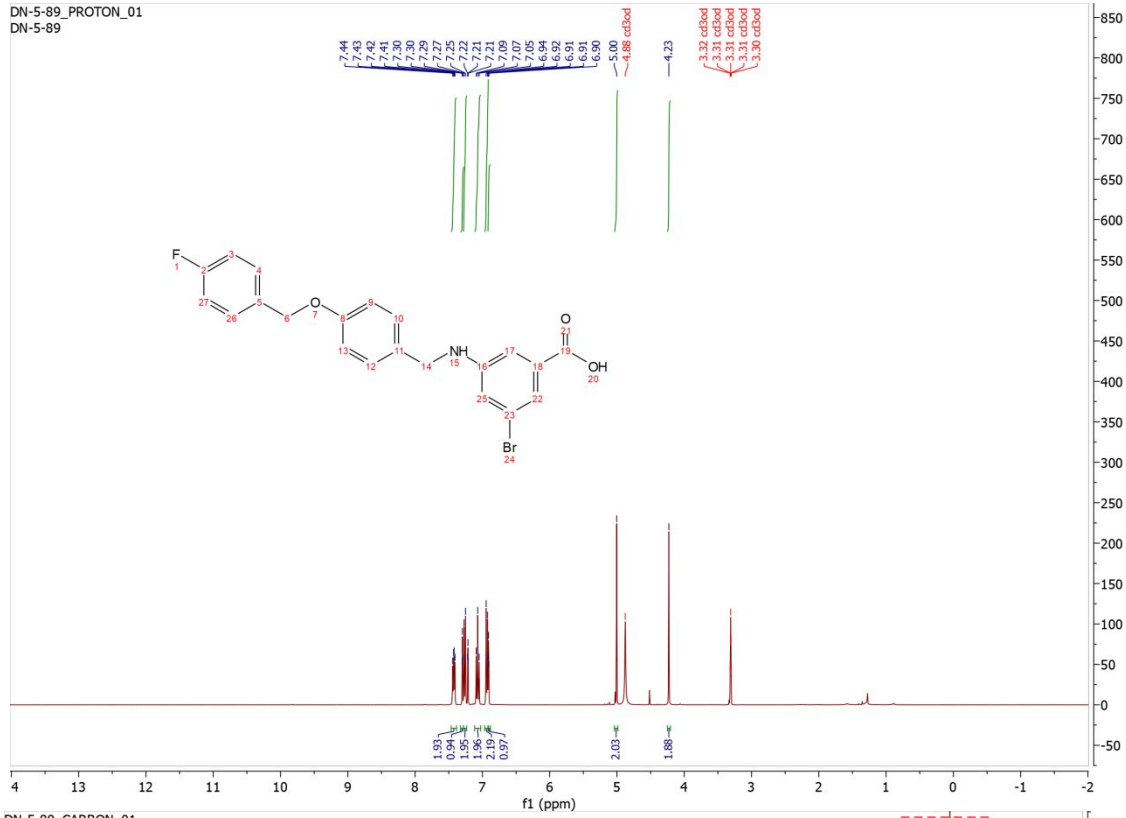

DN-5-89\_CARBON\_01  
DN-5-89

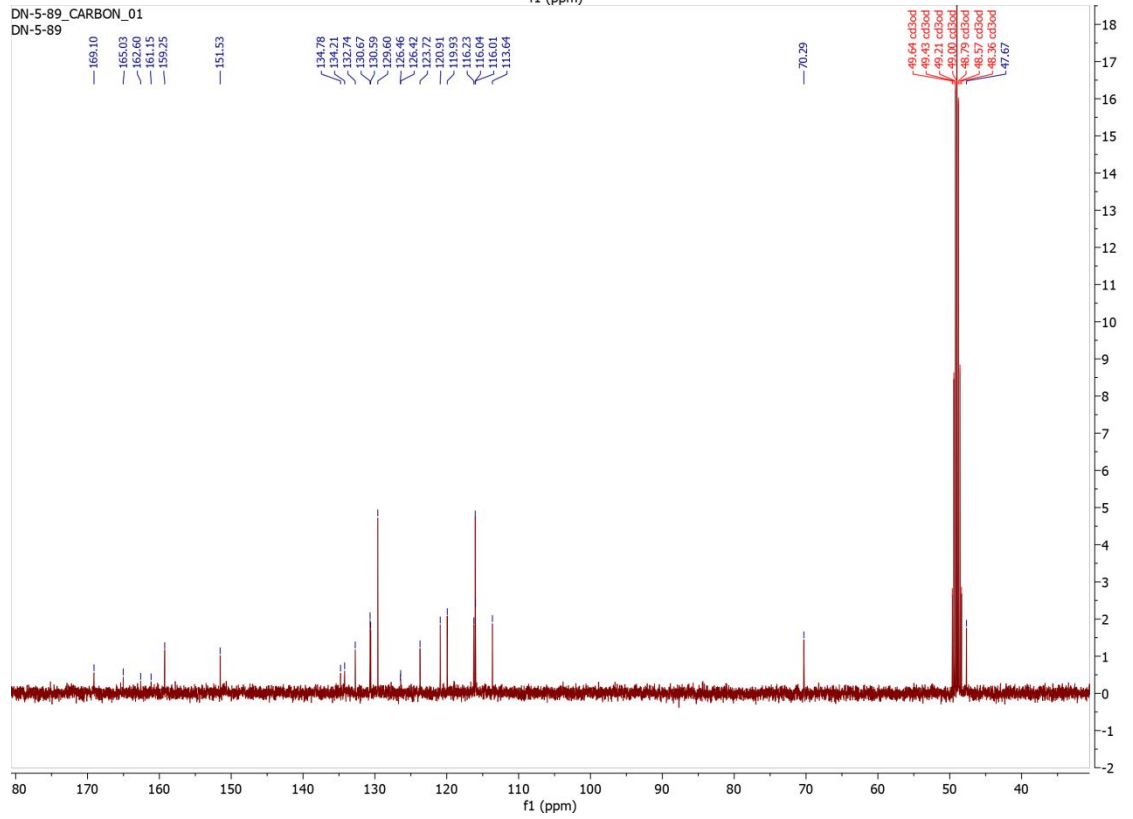

4t

xd\_6\_245 PROTON\_02  
xd\_6\_245

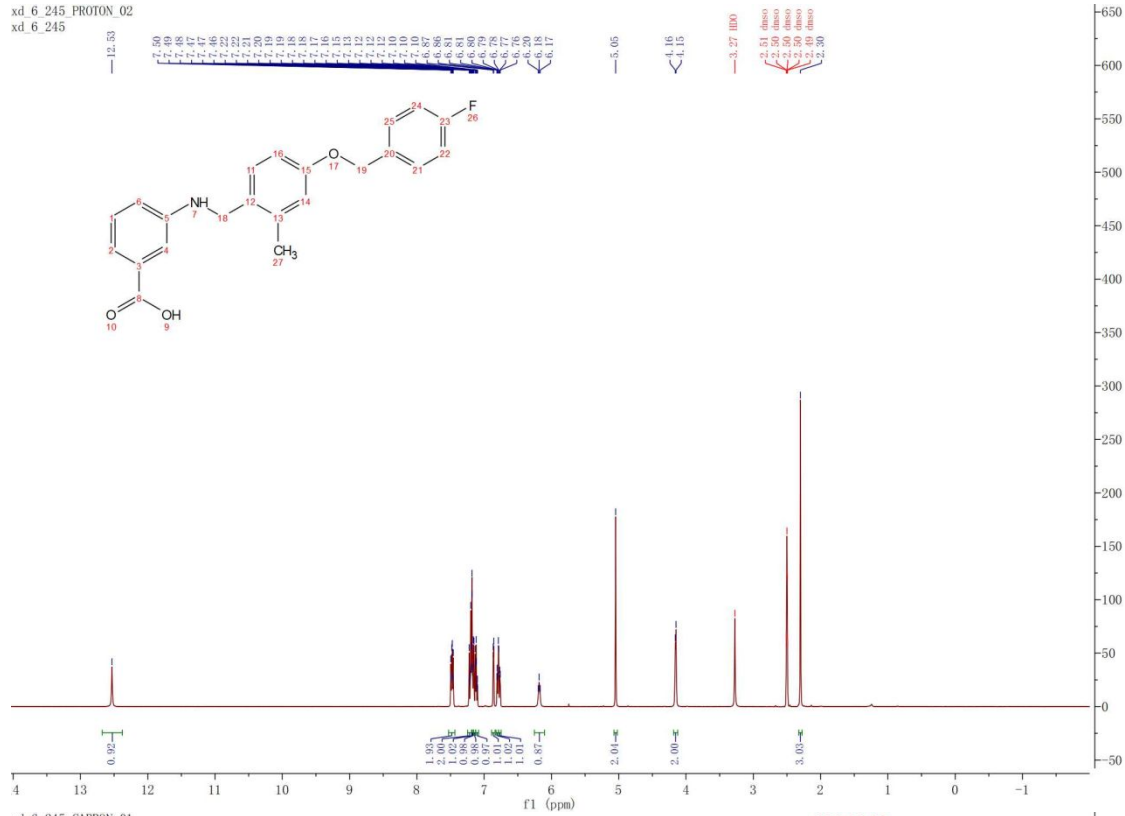

xd\_6\_245 CARBON\_01  
xd\_6\_245

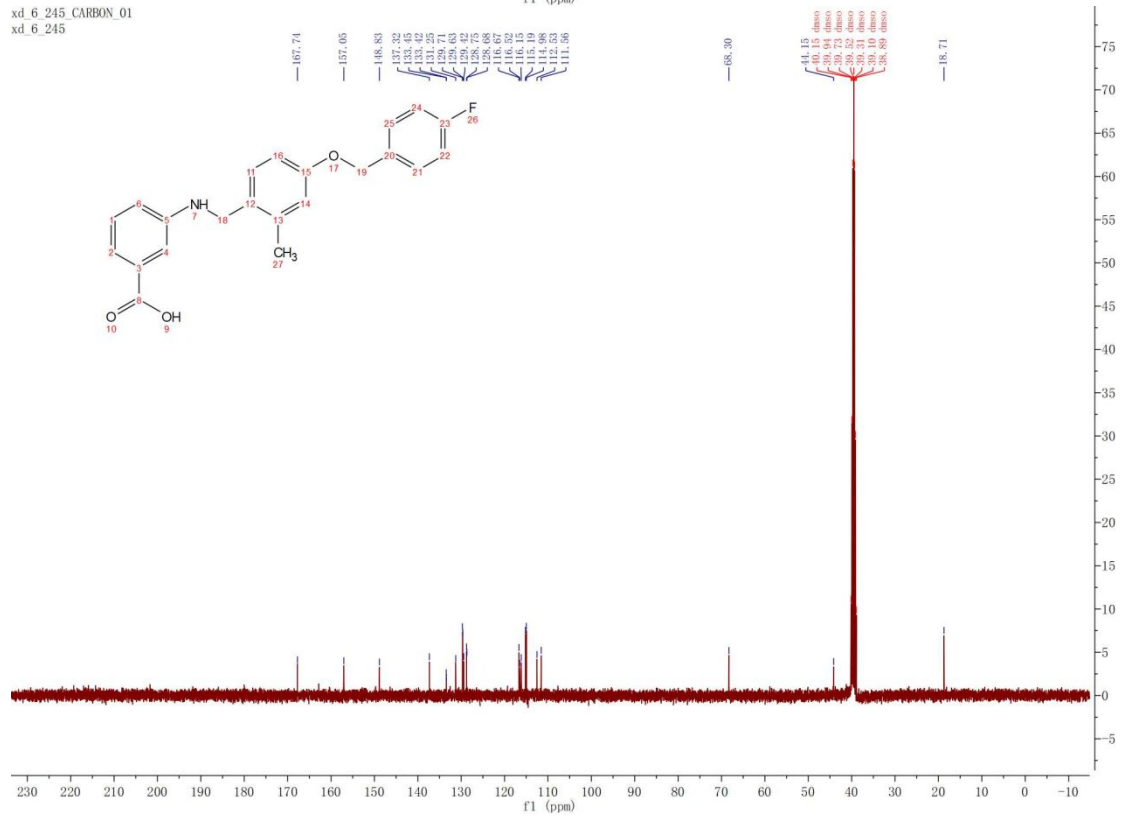





4w

xd\_5\_241\_PROTON\_01  
xd\_5\_241

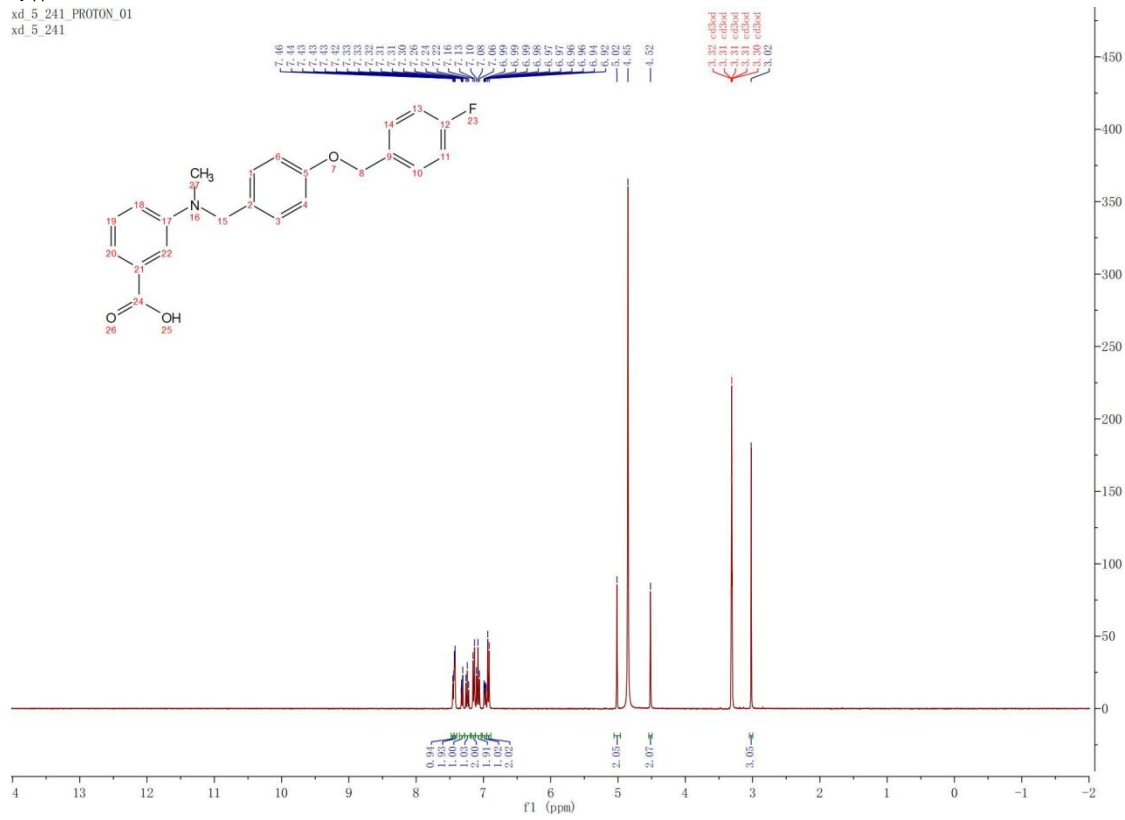

xd\_5\_241\_CARBON\_01  
xd\_5\_241

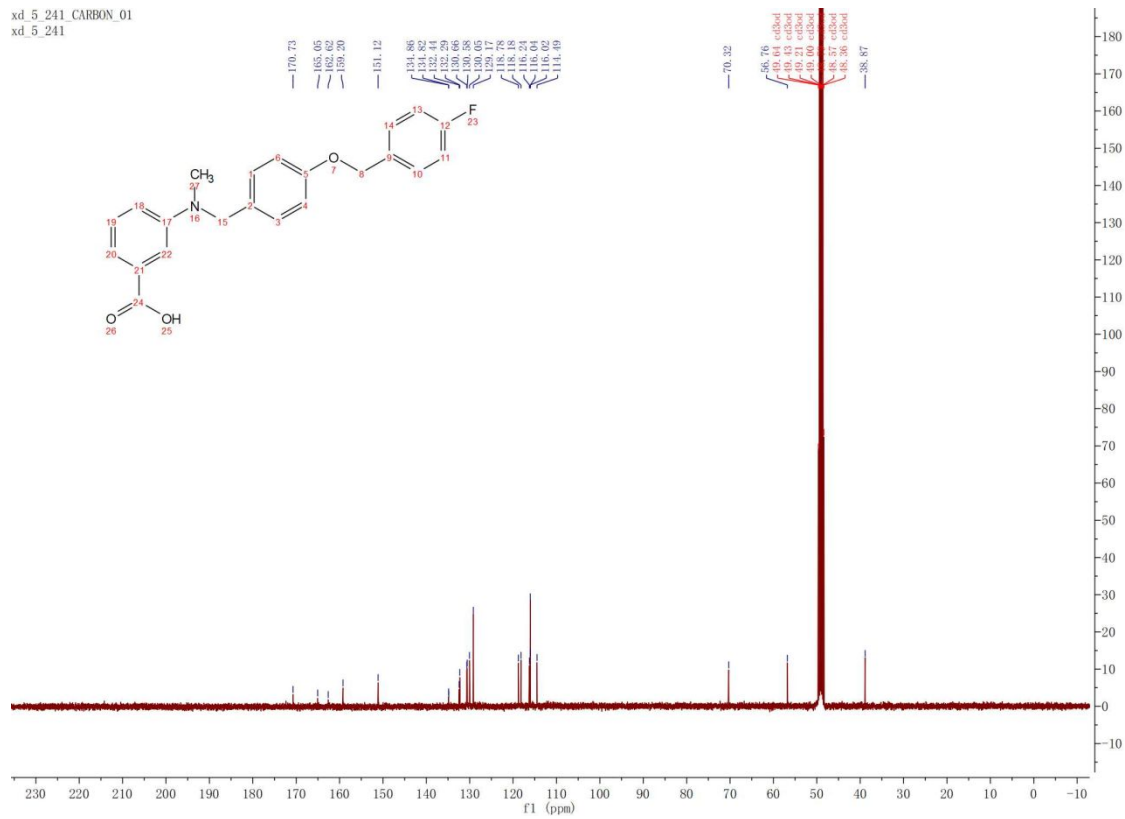

4x

xd\_6\_251\_PROTON\_01  
xd\_6\_251

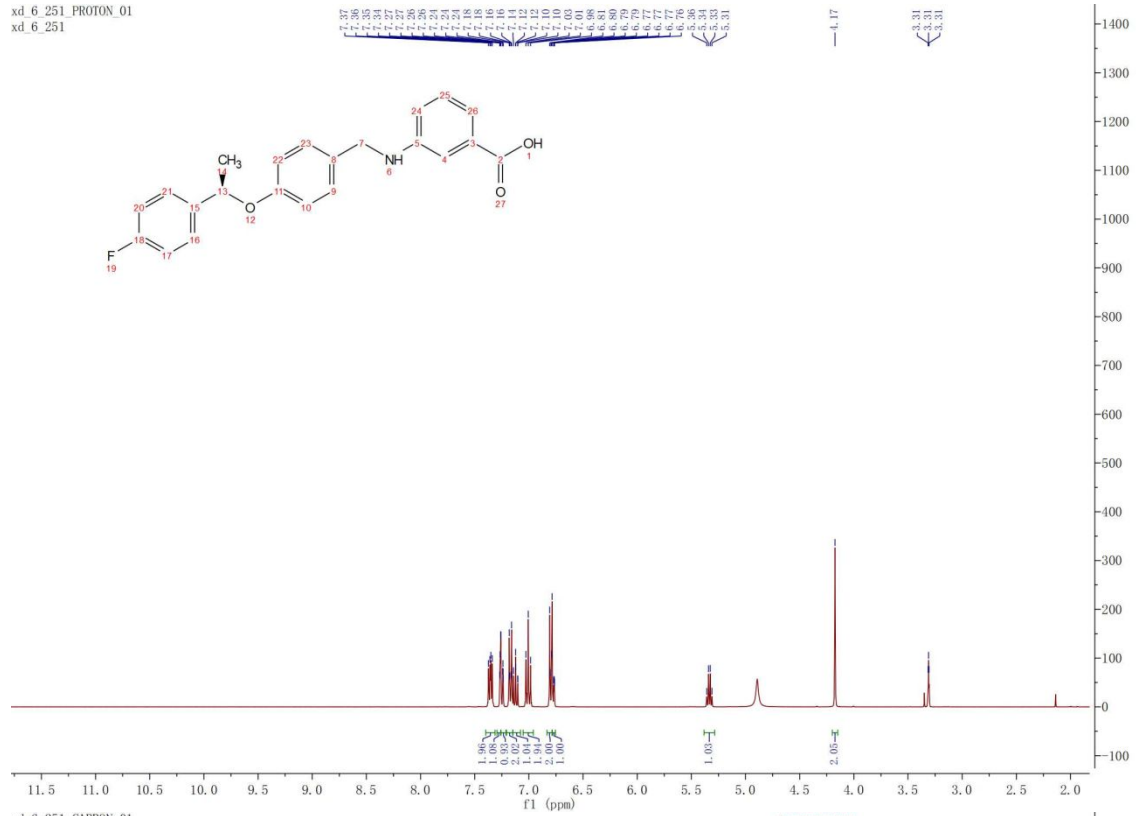

xd\_6\_251\_CARBON\_01  
xd\_6\_251

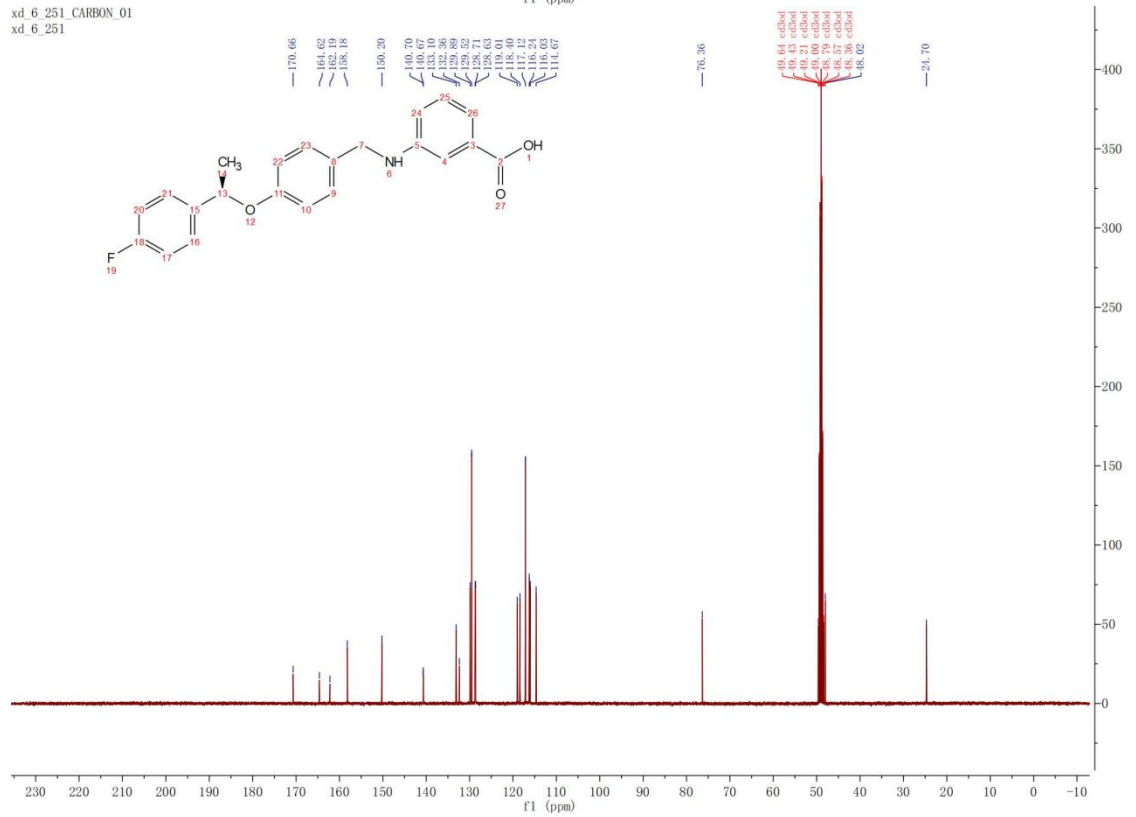



4y

xd\_7\_13\_PROTON\_01  
xd\_7\_13

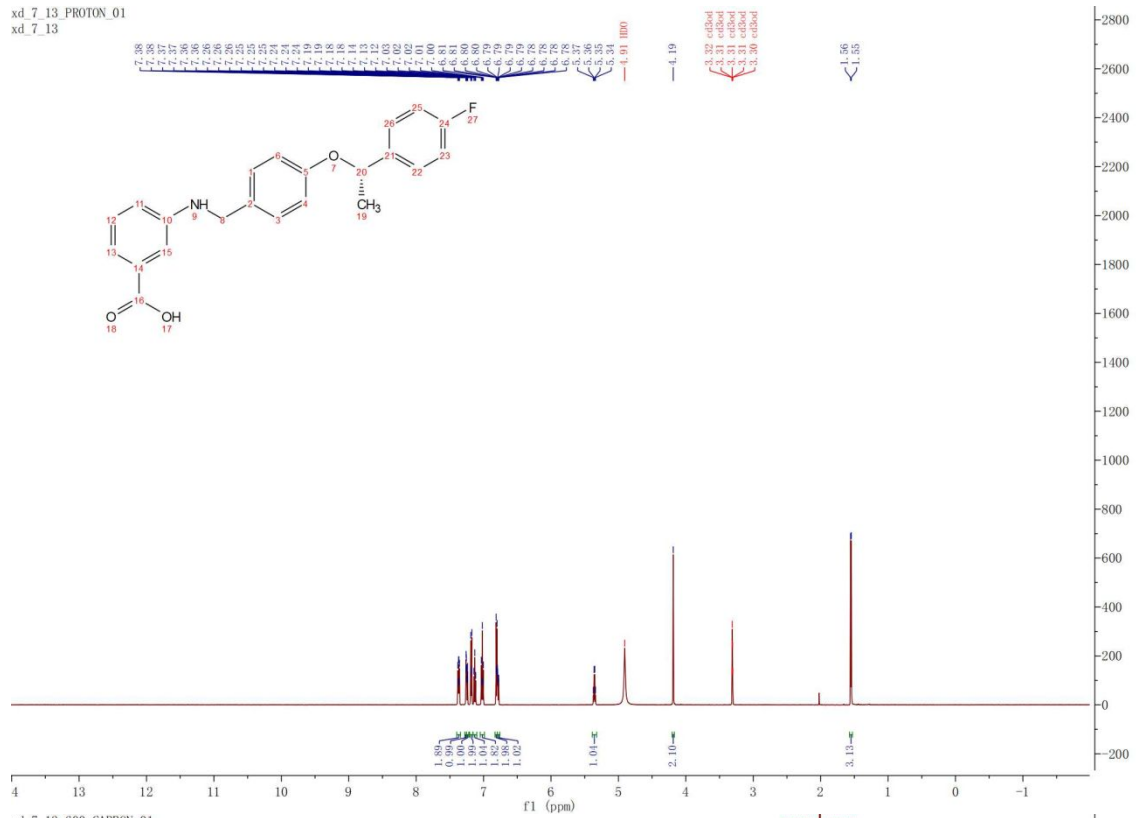

xd\_7\_13\_600 CARBON\_01  
xd\_7\_13

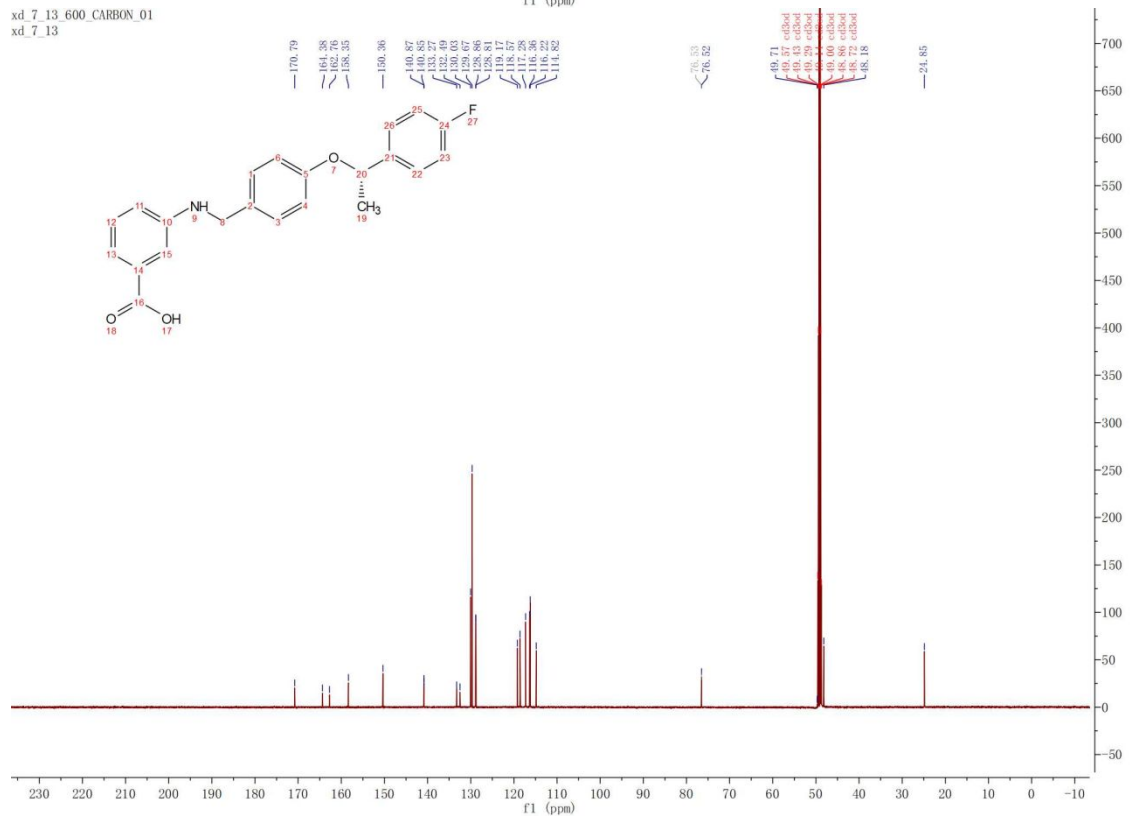



5a

xd\_4\_211\_PROTON\_01  
xd\_4\_211

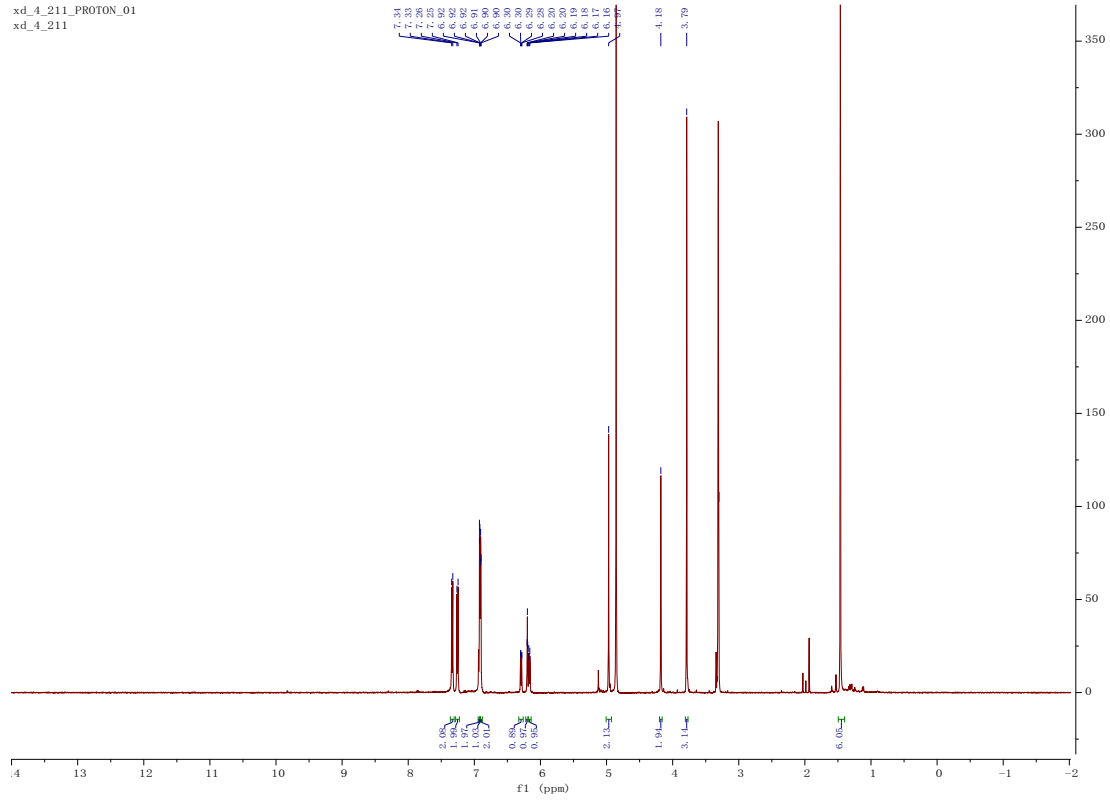

xd\_4\_211\_CARBON\_01  
xd\_4\_211

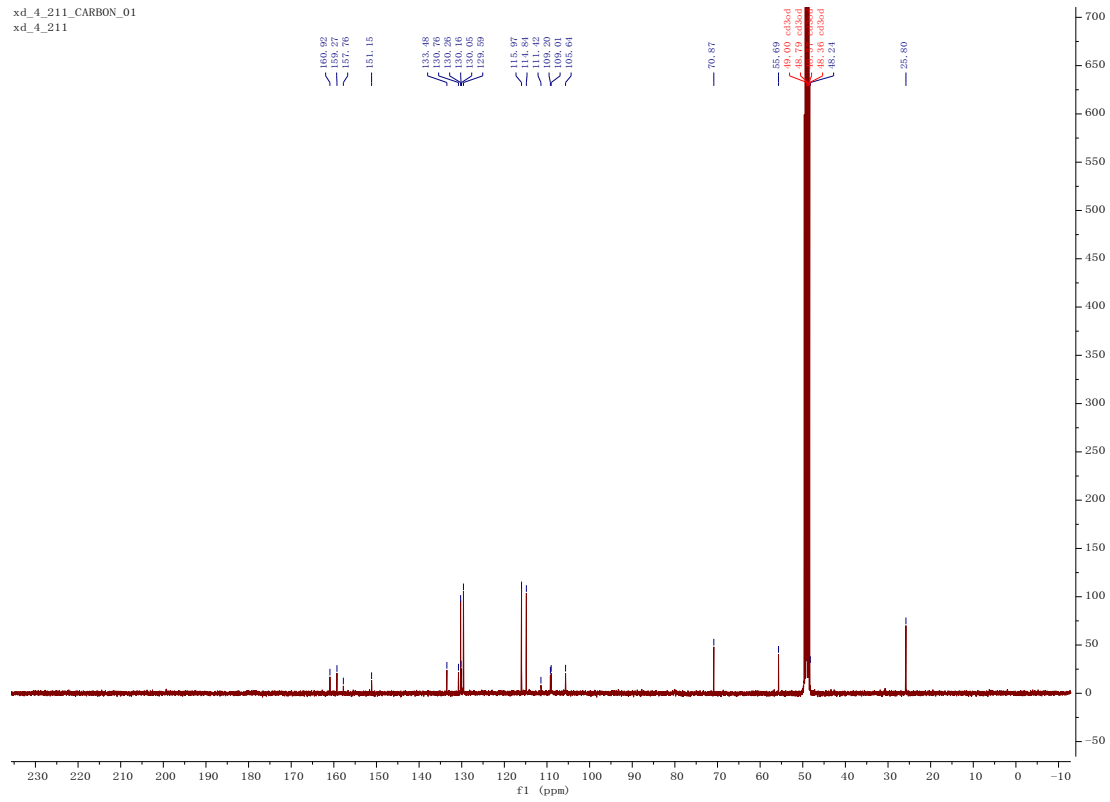



5b\*

DN-5-79\_1\_PROTON\_01  
DN-5-79\_1

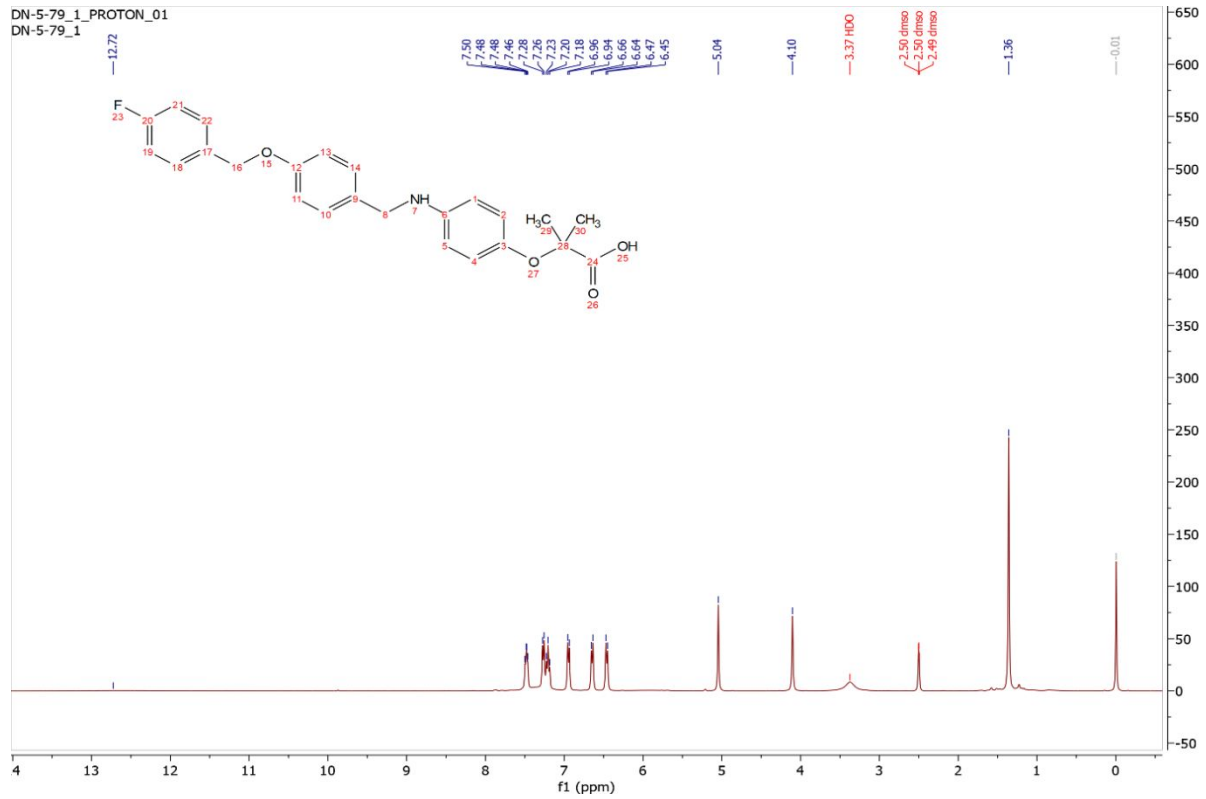

DN-5-79\_1\_CARBON\_01  
DN-5-79\_1

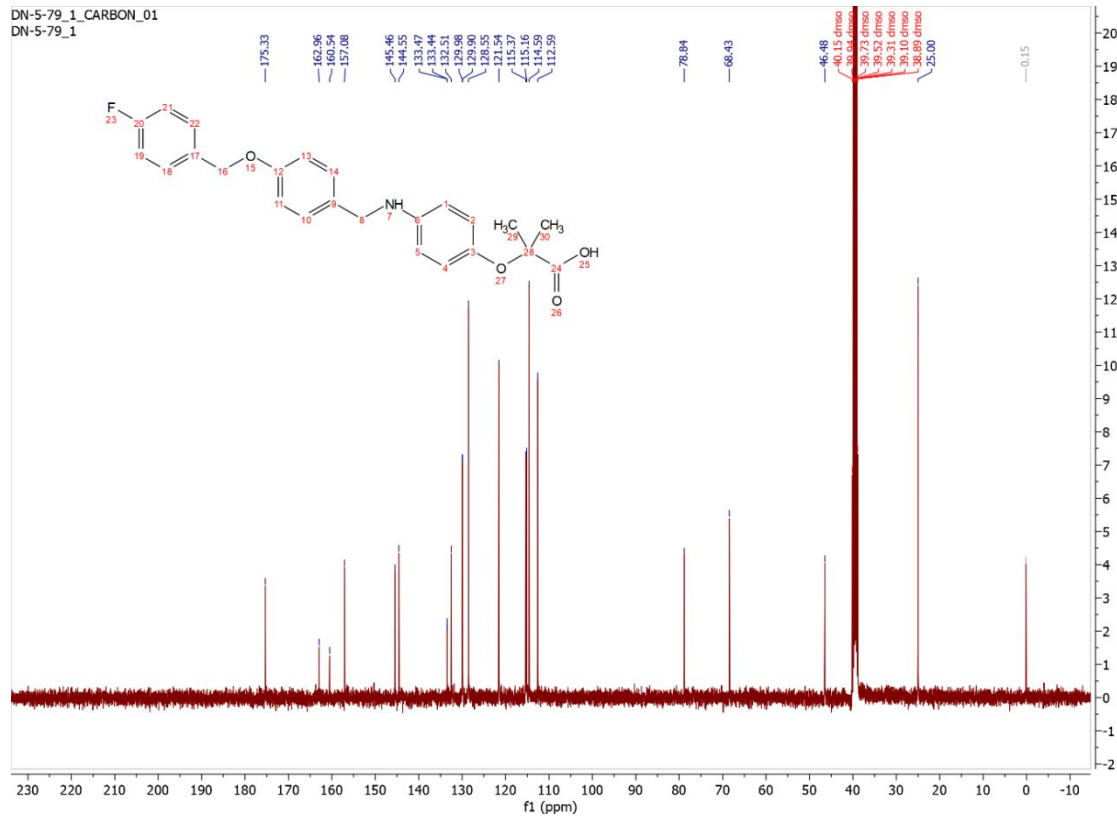









# 19c

xd\_5\_117\_2\_carbon\_PROTON\_01  
xd\_5\_117\_2\_carbon

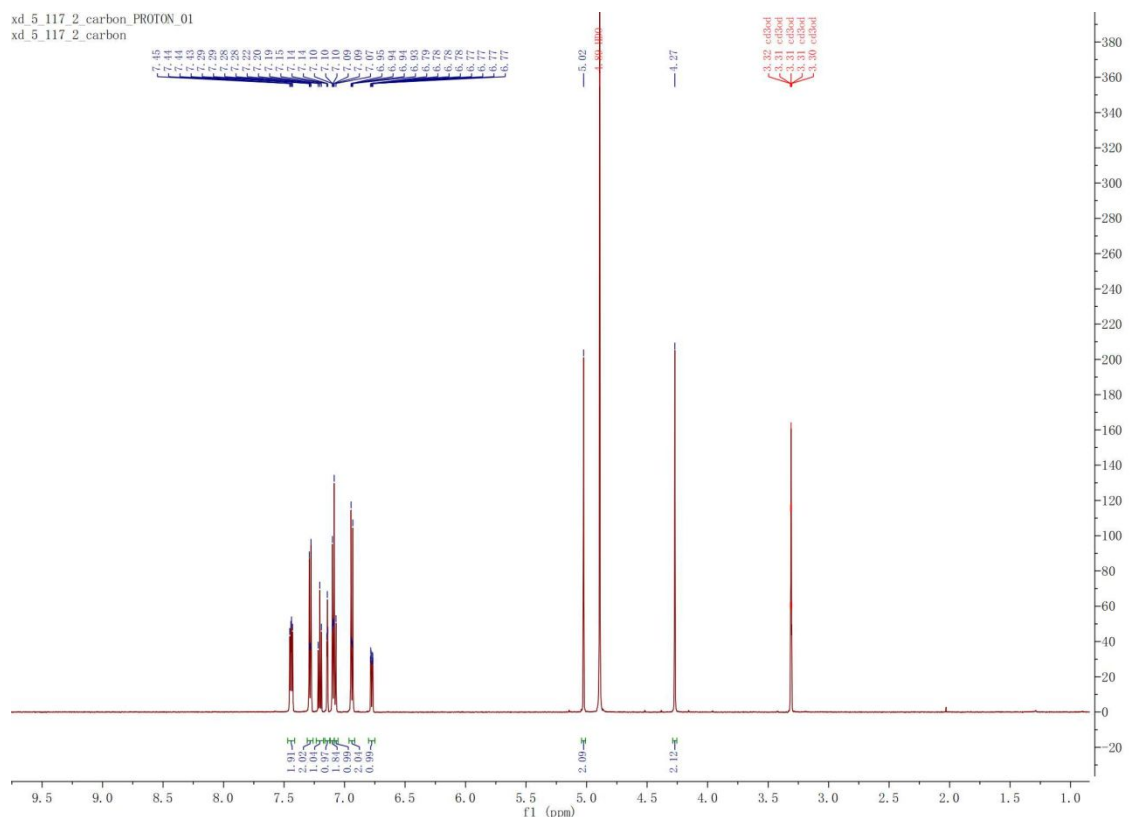

xd\_5\_117\_2\_carbon\_CARBON\_01  
xd\_5\_117\_2\_carbon

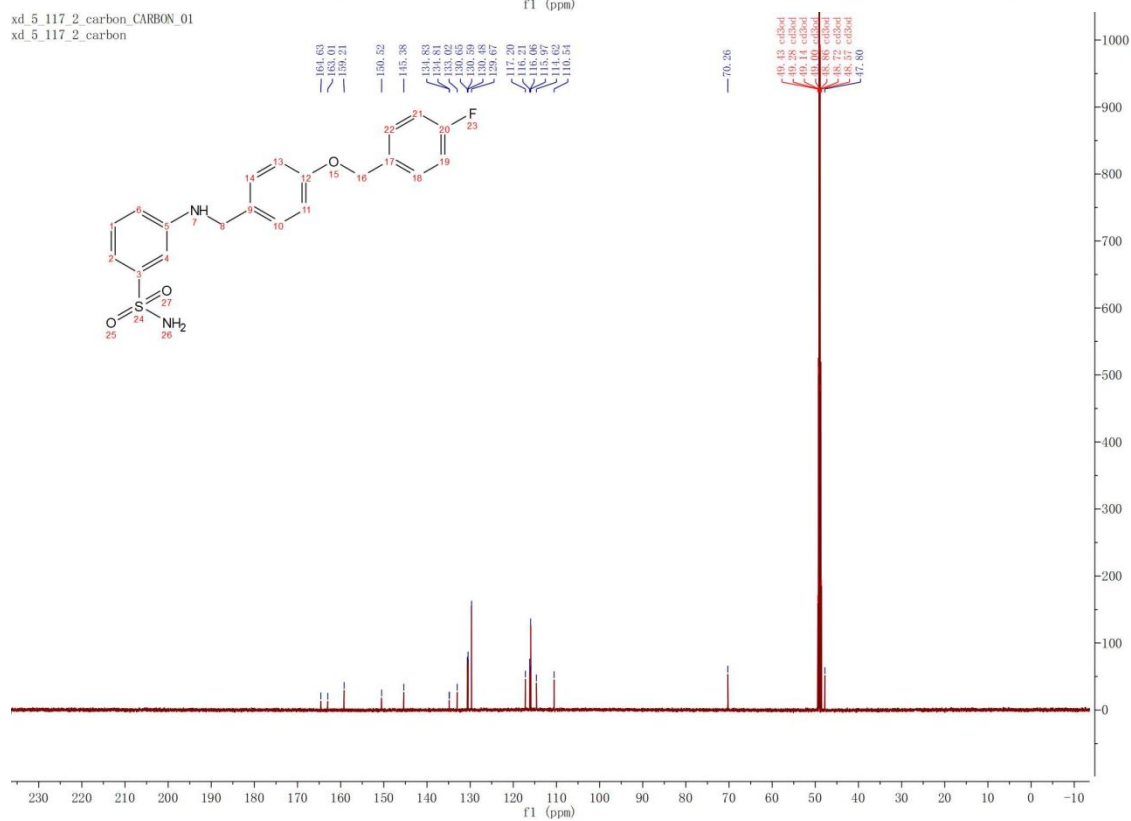

# 19d

xd\_5\_219\_PROTON\_01  
xd\_5\_219

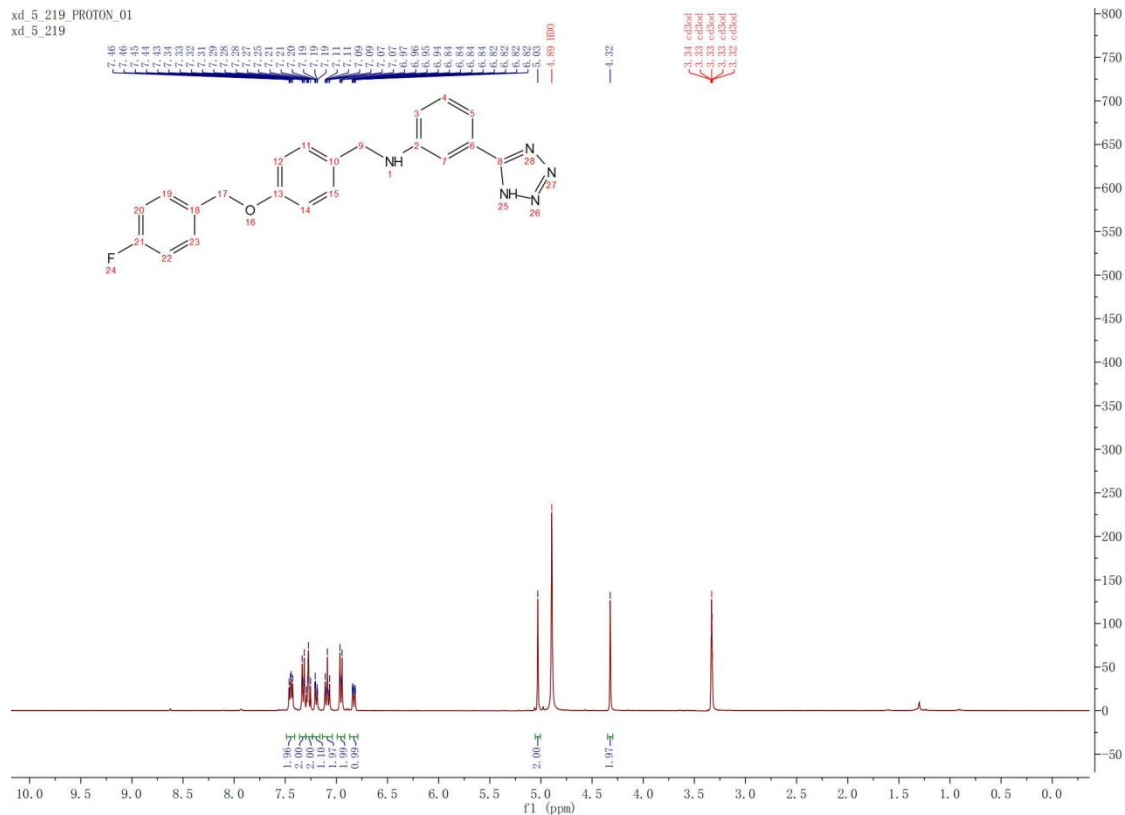

xd\_5\_219 CARBON\_01  
xd\_5\_219

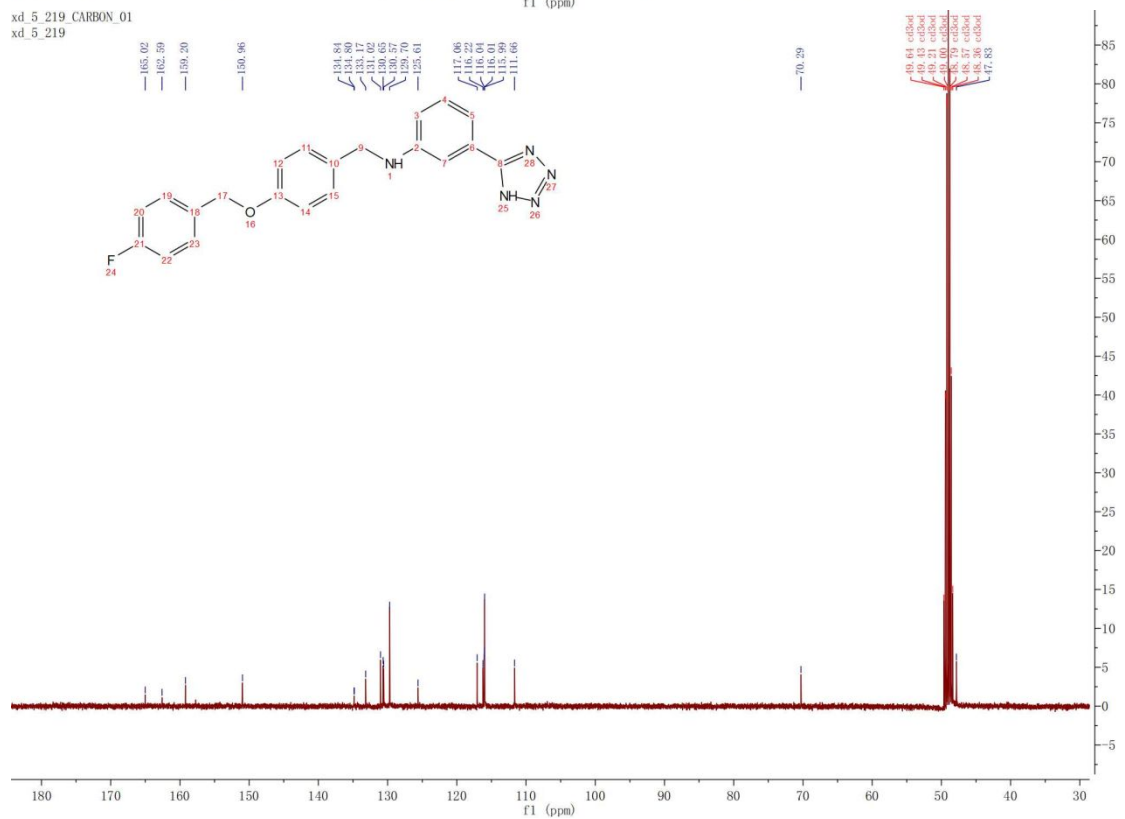

# 19e

xd\_6\_29\_P\_Methanol\_PROTON\_01  
 xd\_6\_29\_P\_Methanol

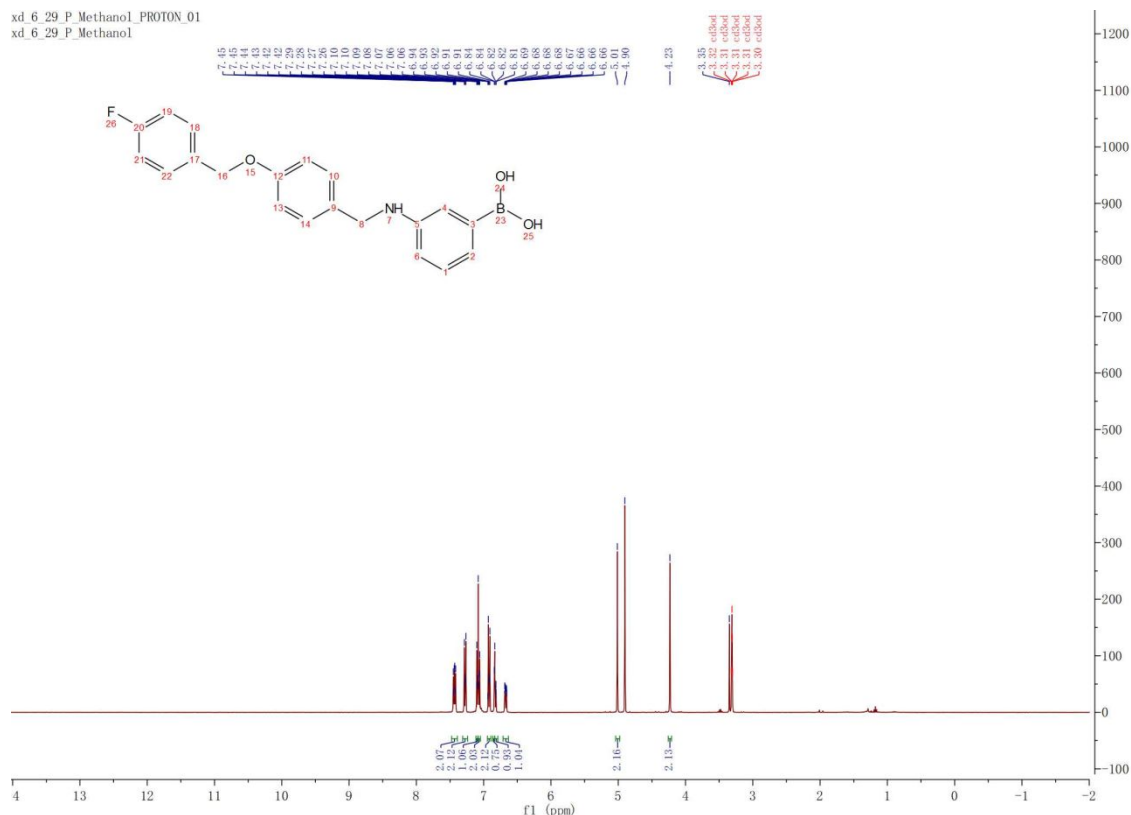



20

xd\_7\_49\_600 PROTON\_02  
xd\_7\_49\_600

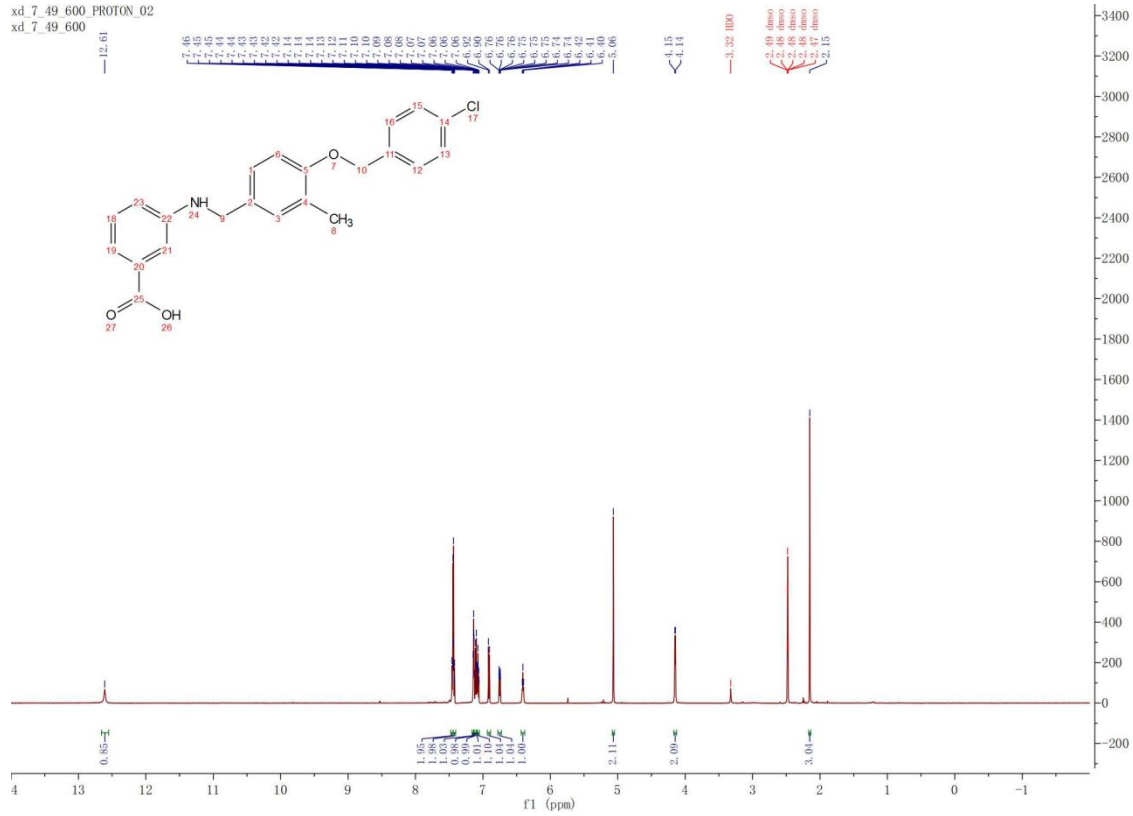

xd\_7\_49\_600 CARBON\_01  
xd\_7\_49\_600

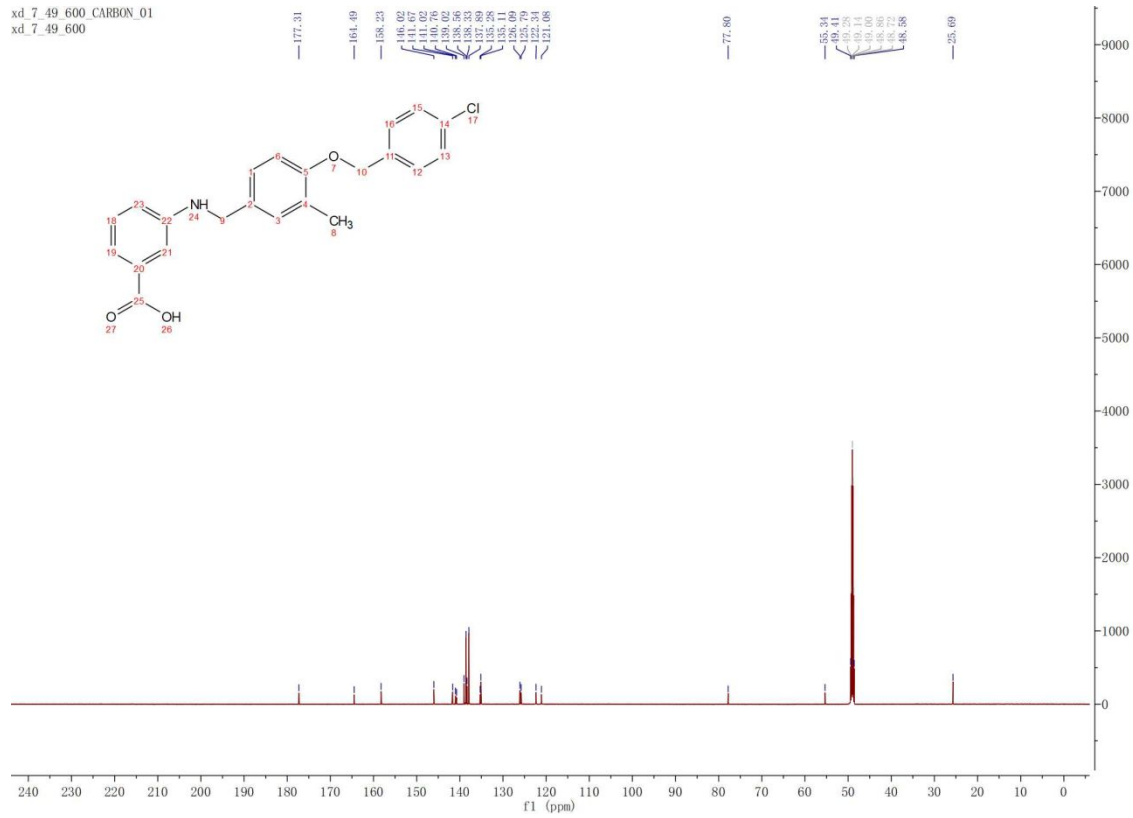

21

xd\_7\_51\_600 PROTON\_02  
xd\_7\_51\_600

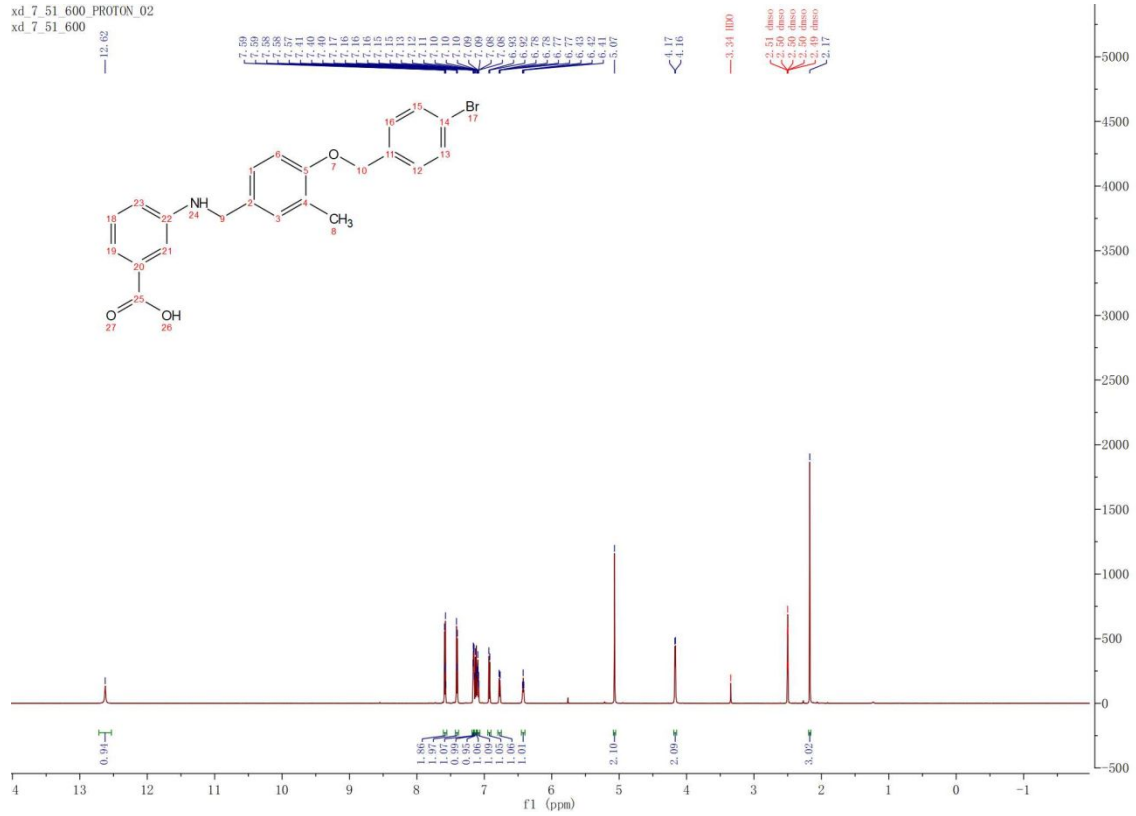

xd\_7\_51\_600 CARBON\_01  
xd\_7\_51\_600

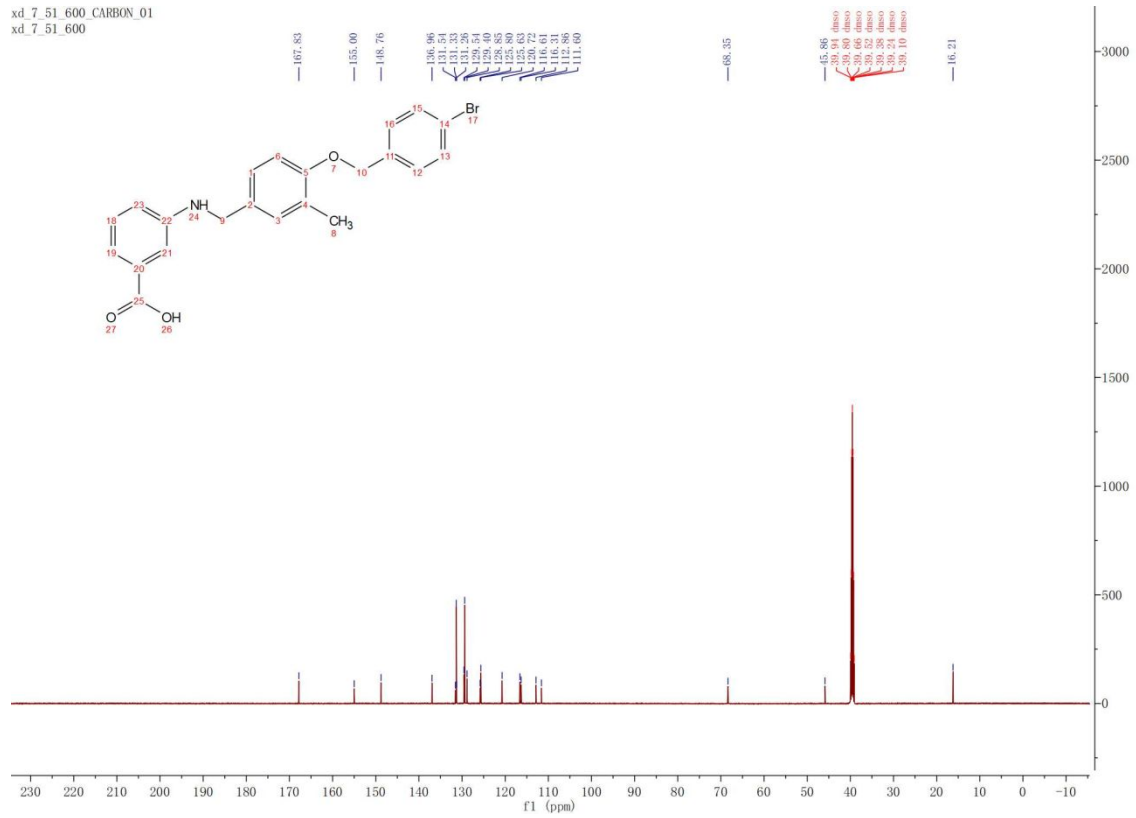

xd\_7\_53\_600 PROTON\_02  
 xd\_7\_53\_600

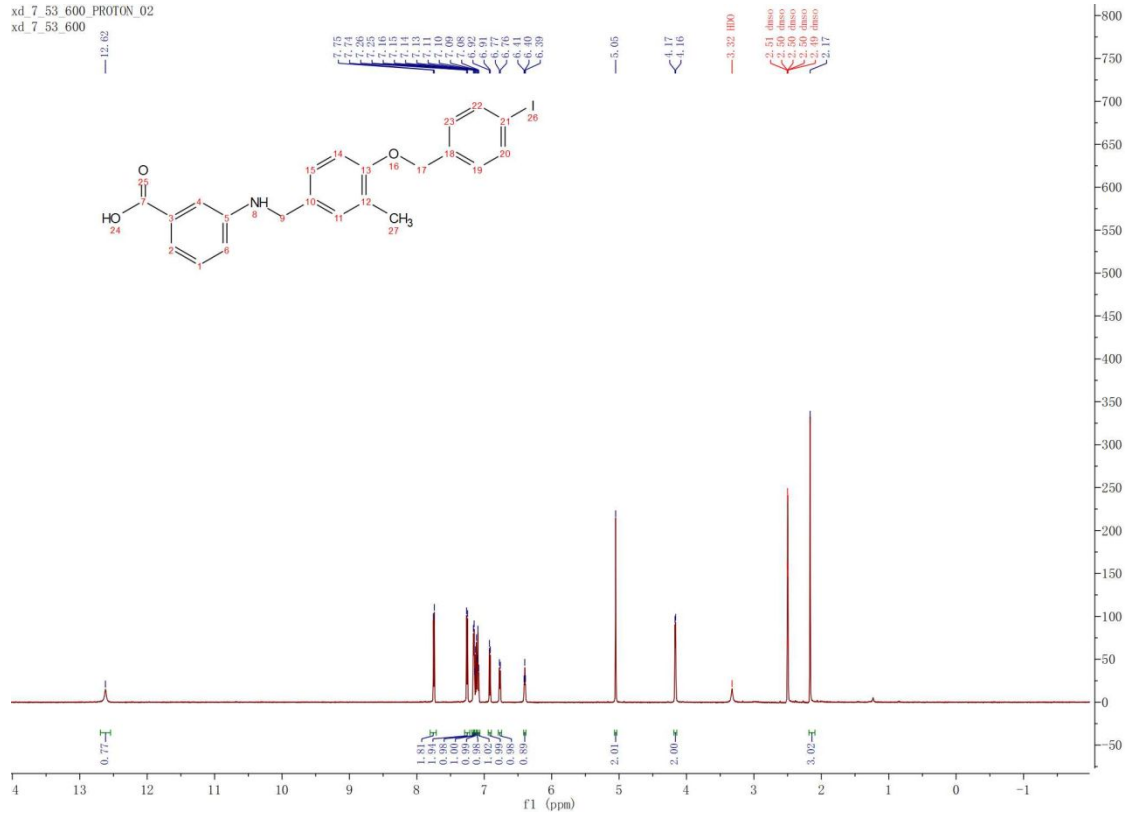

xd\_7\_53\_600 CARBON\_01  
 xd\_7\_53\_600

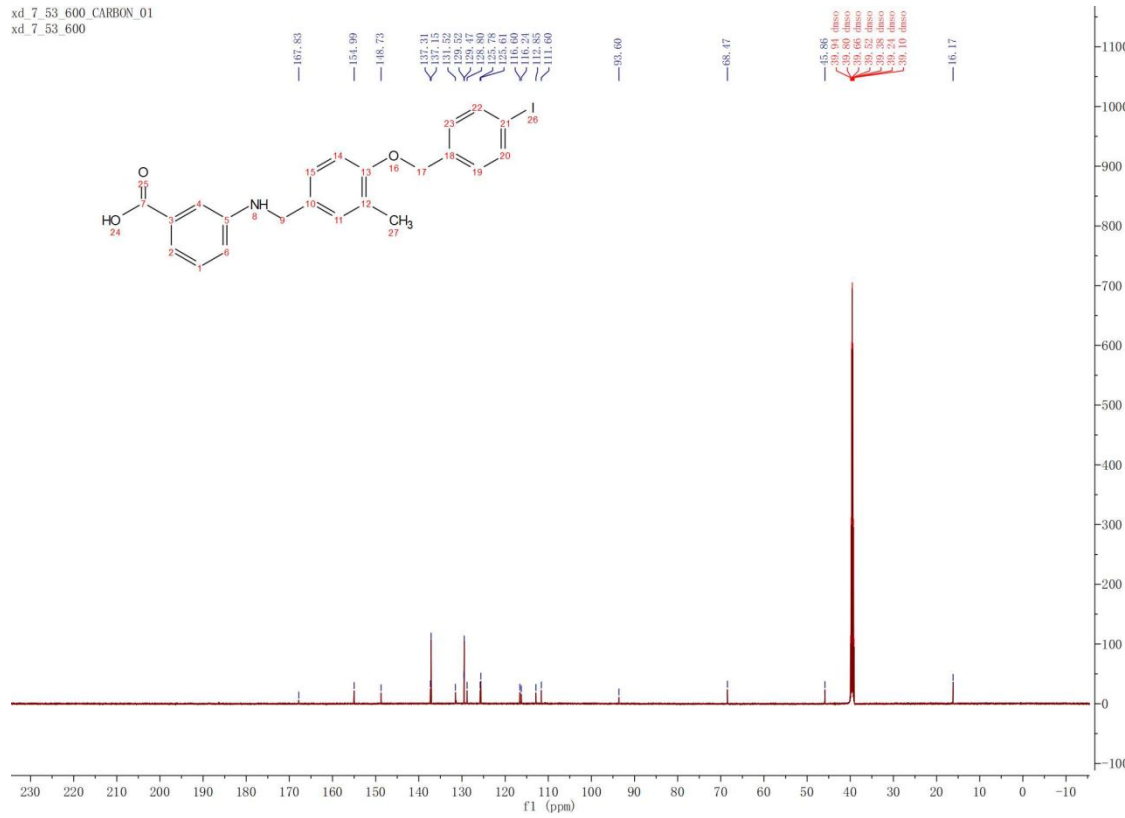

23

xd\_6\_193 PROTON\_02  
xd\_6\_193

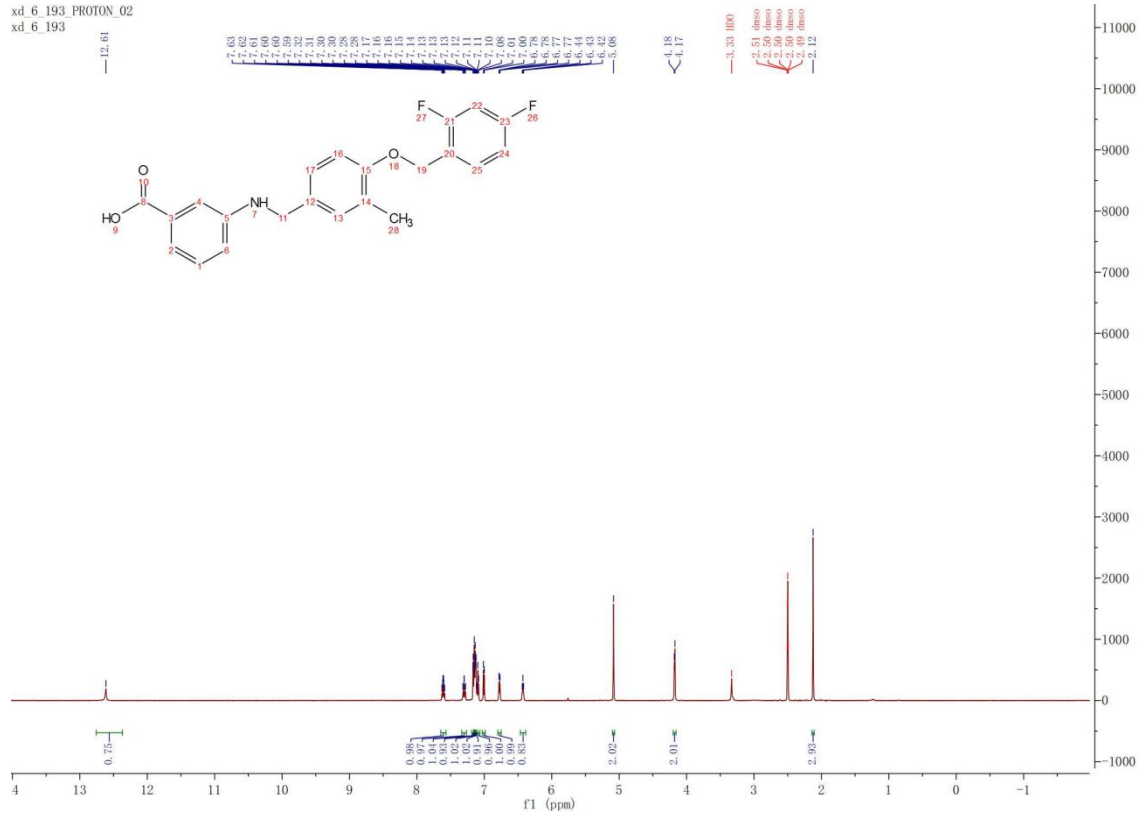

xd\_6\_193 CARBON\_01  
xd\_6\_193

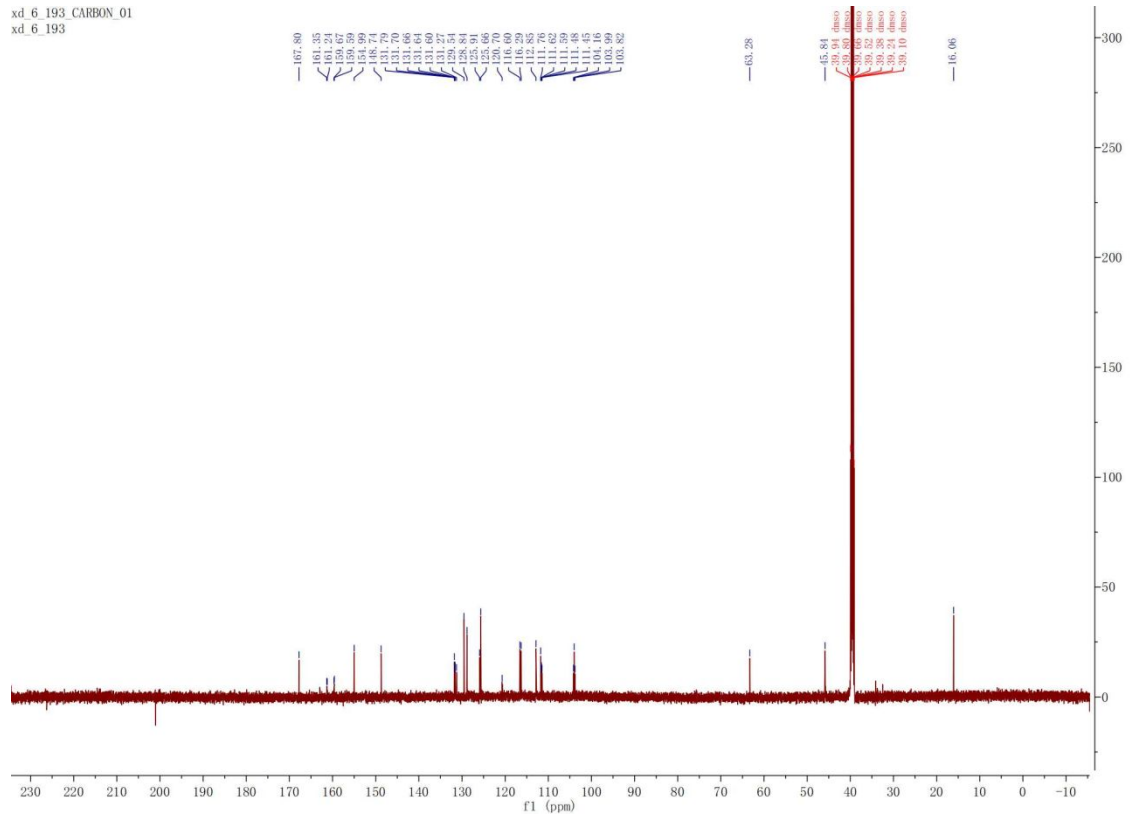



24

xd\_6\_207\_PROTON\_02  
xd\_6\_207

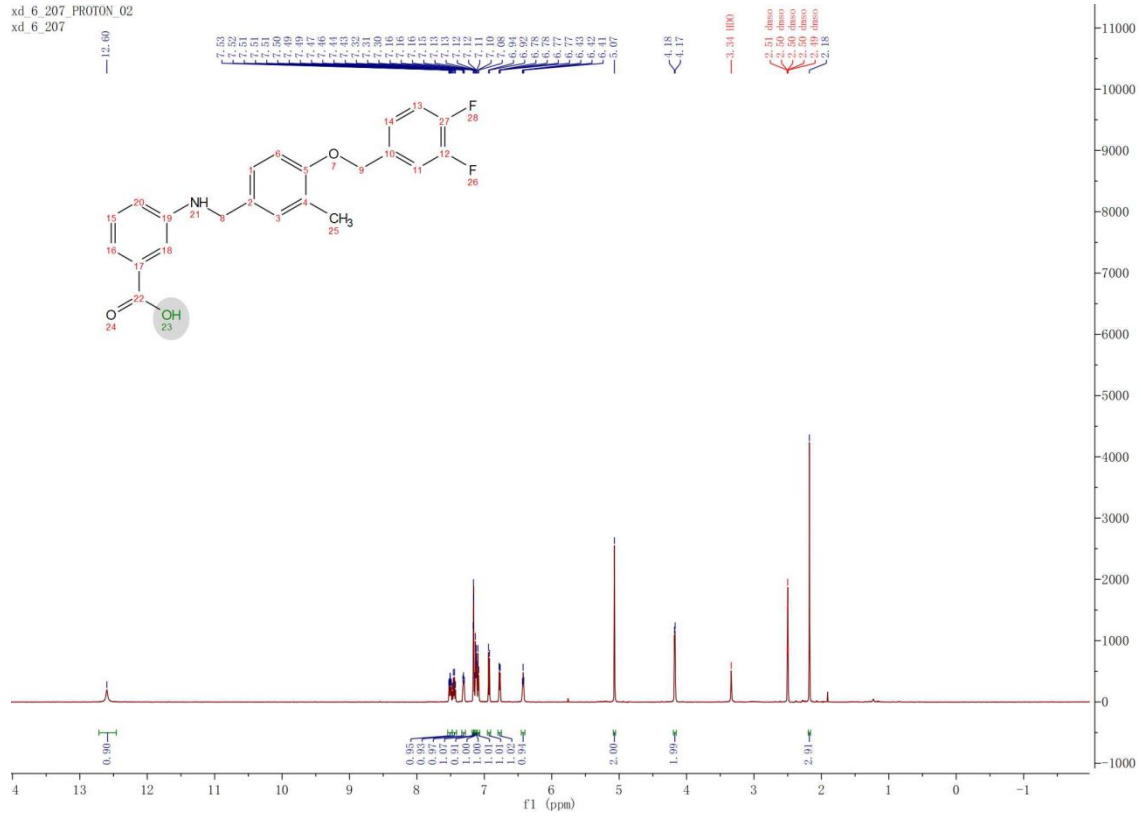

xd\_6\_207 CARBON\_01  
xd\_6\_207

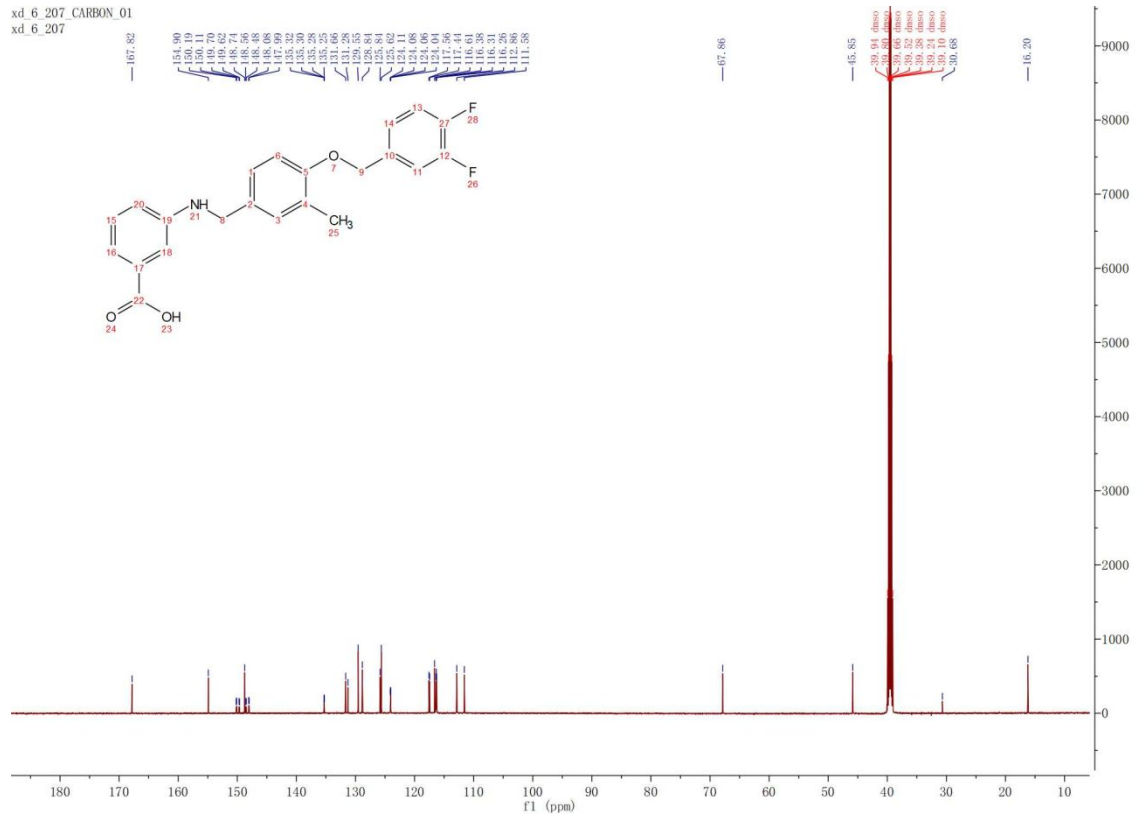

25

xd\_6\_215\_600 PROTON\_04  
xd\_6\_215\_600

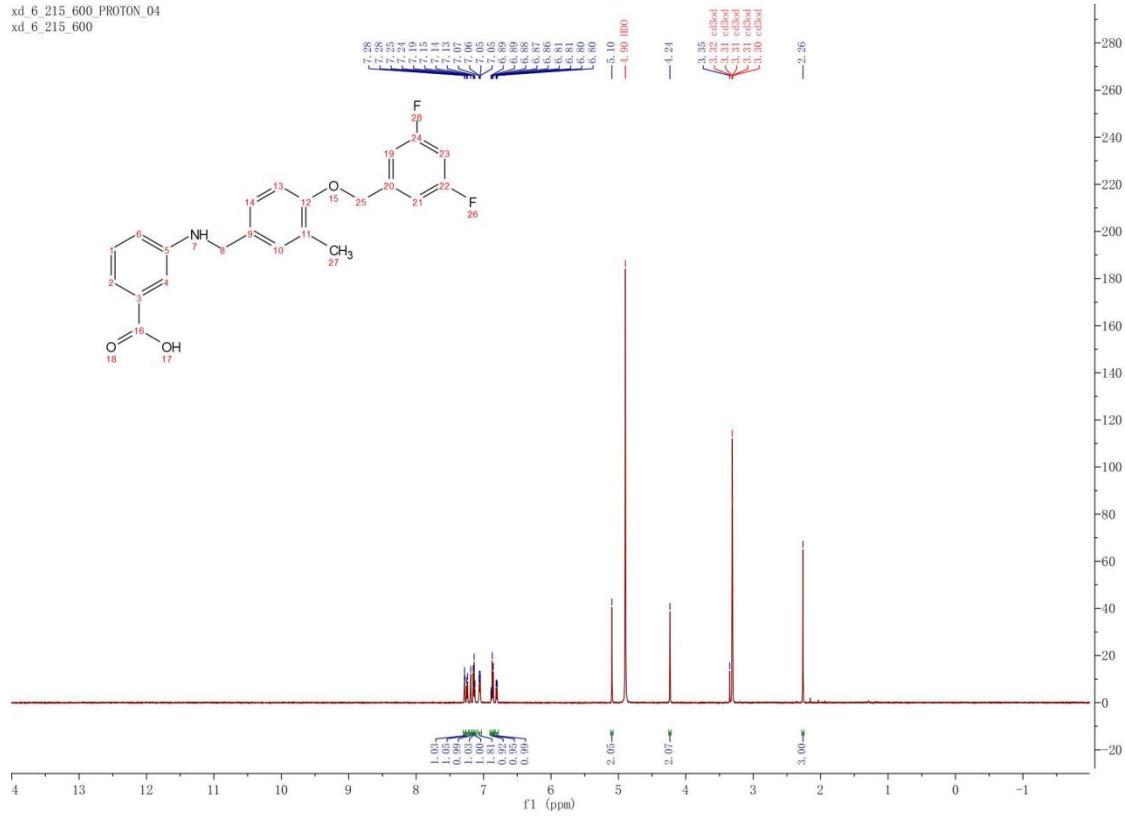

xd\_6\_215\_600 CARBON\_01  
xd\_6\_215\_600

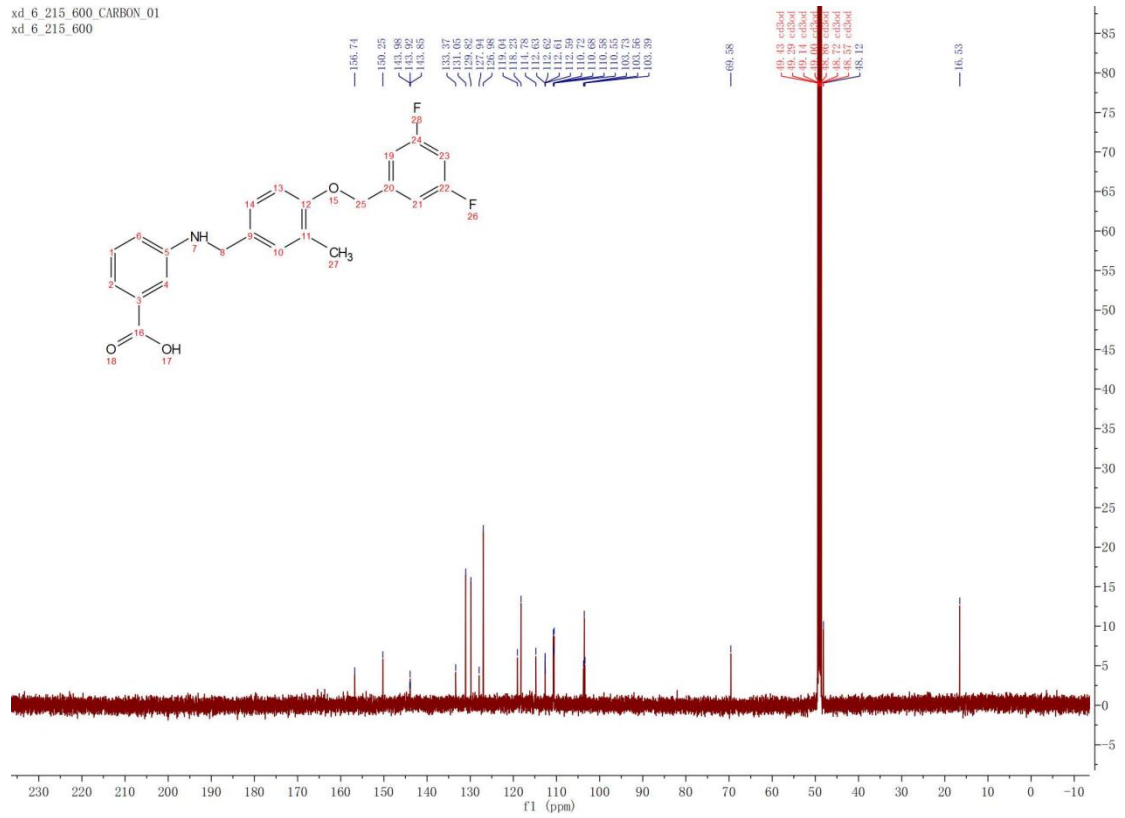

S50

26

xd\_6\_253 PROTON\_02  
xd\_6\_253

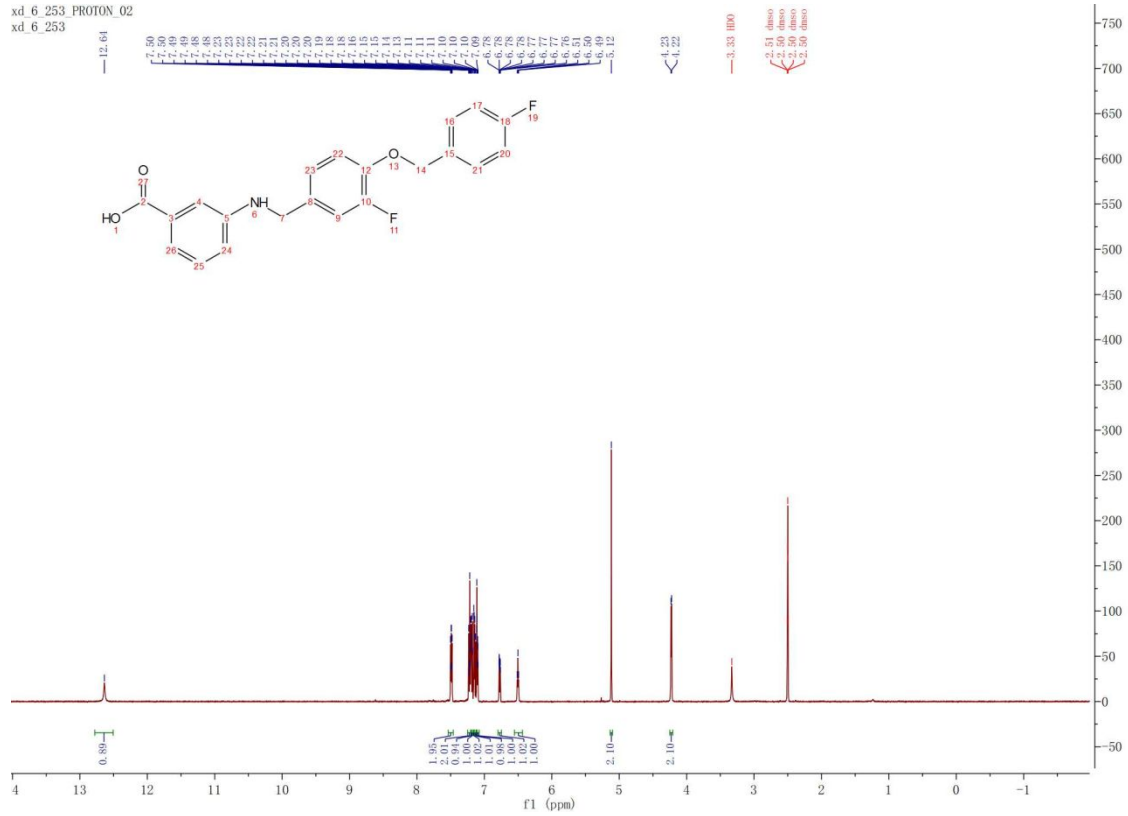

xd\_6\_253 CARBON\_01  
xd\_6\_253

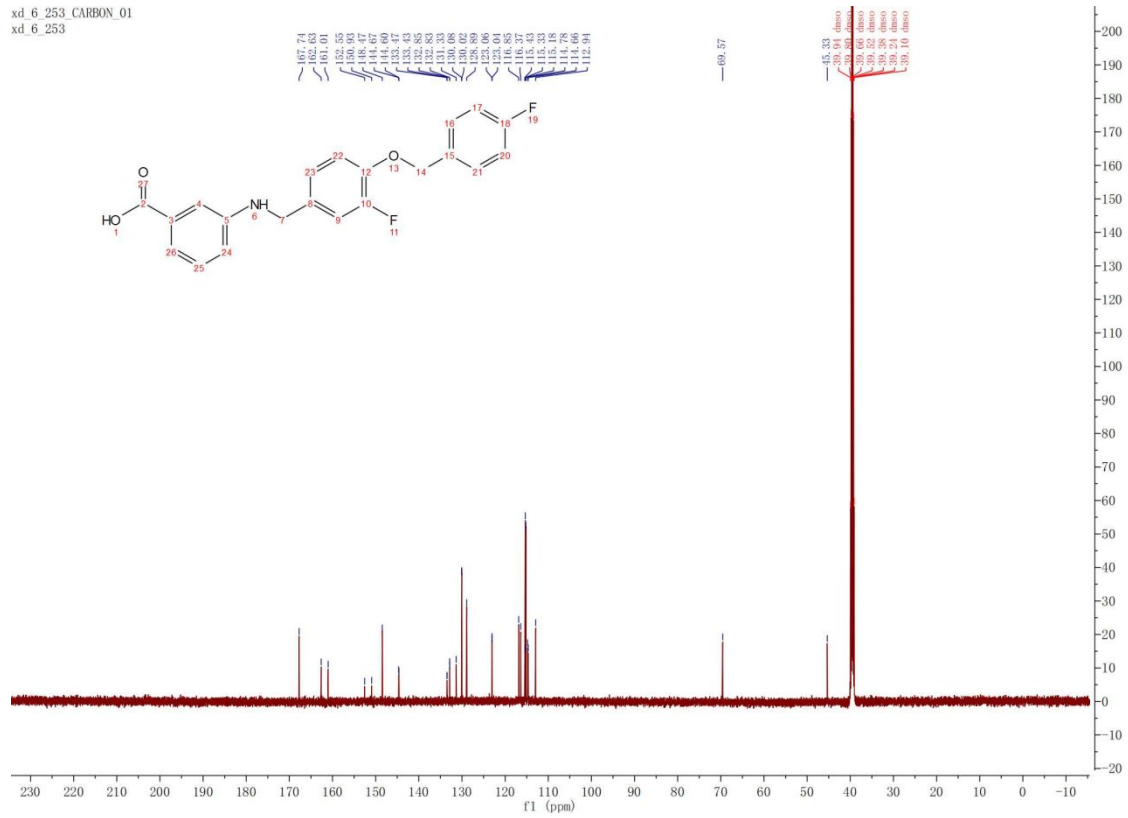

S51

27

xd\_6\_291\_600 PROTON\_02  
xd\_6\_291\_600

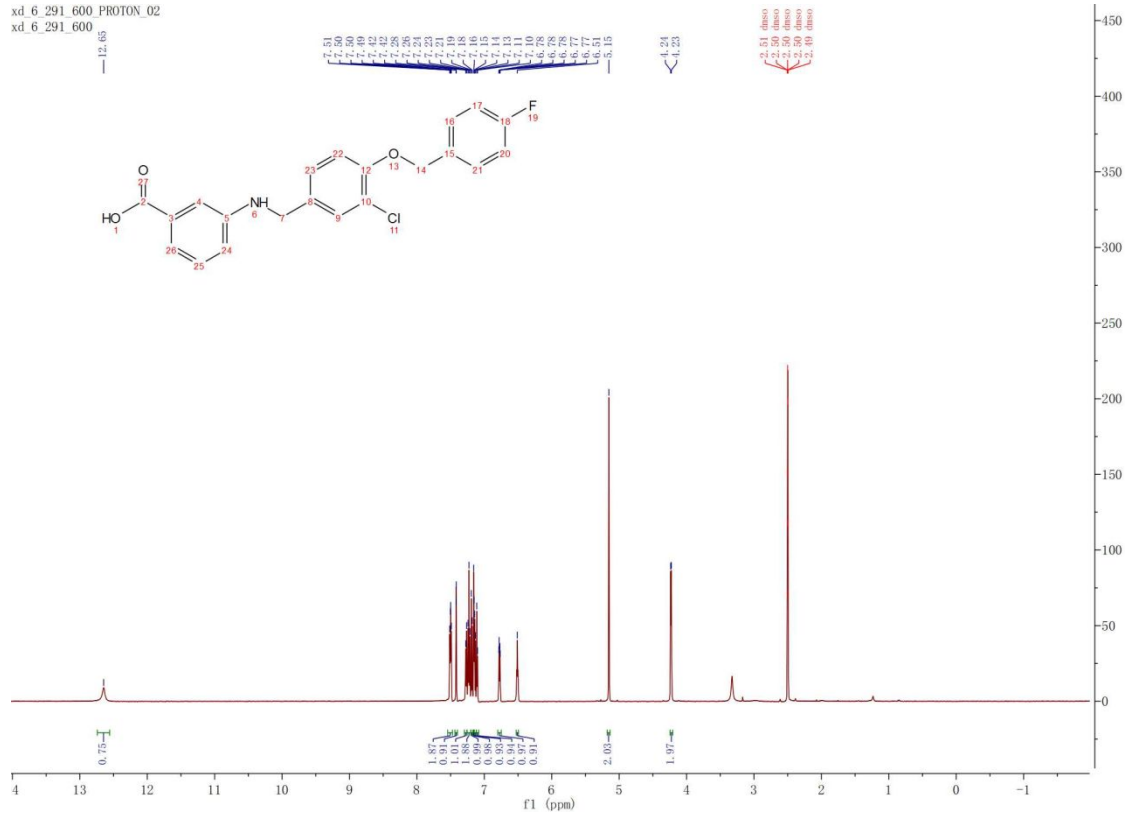

xd\_6\_291\_600 CARBON\_01  
xd\_6\_291\_600

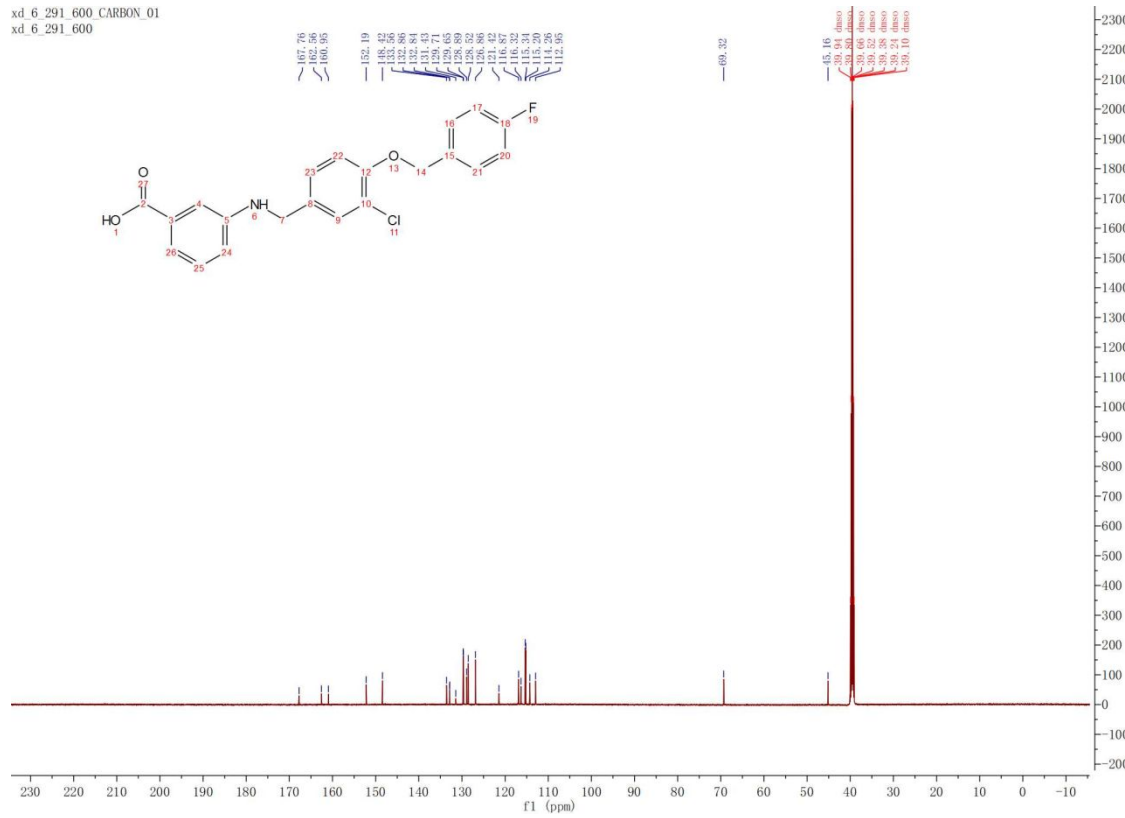

28

xd\_6\_249\_PROTON\_02  
xd\_6\_249

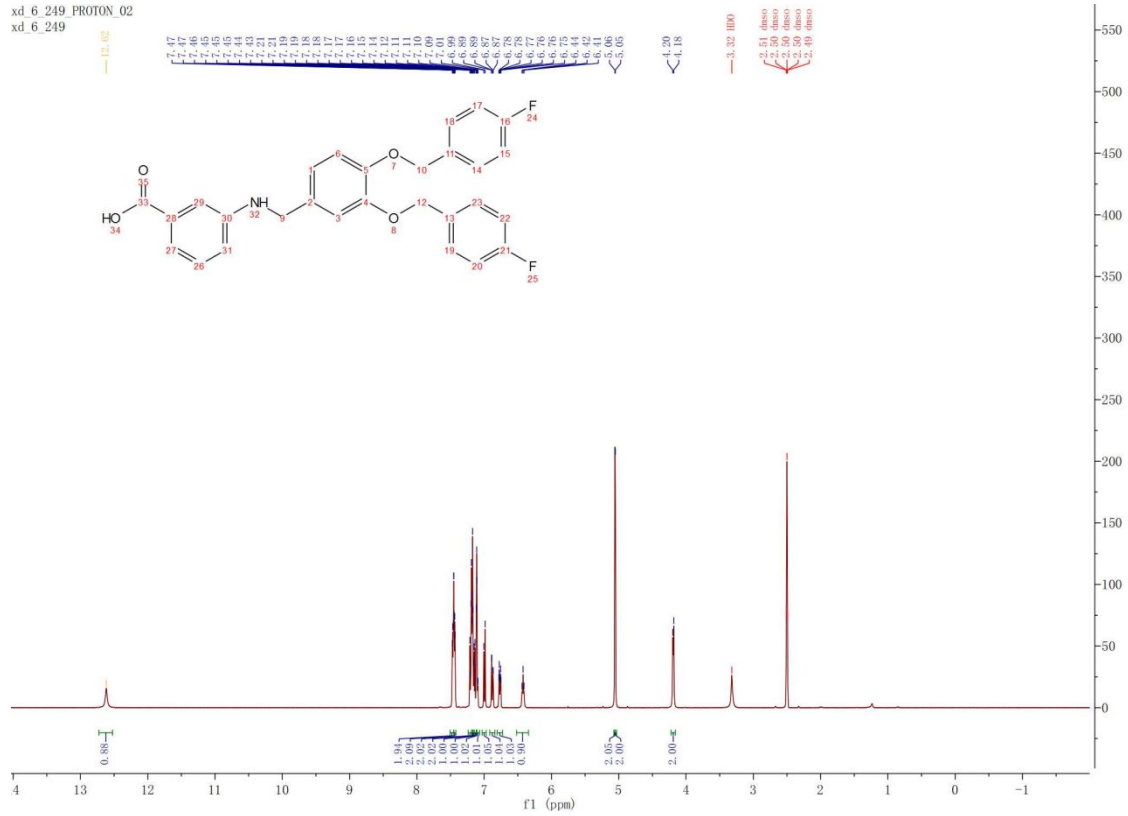

xd\_6\_249\_CARBON\_01  
xd\_6\_249

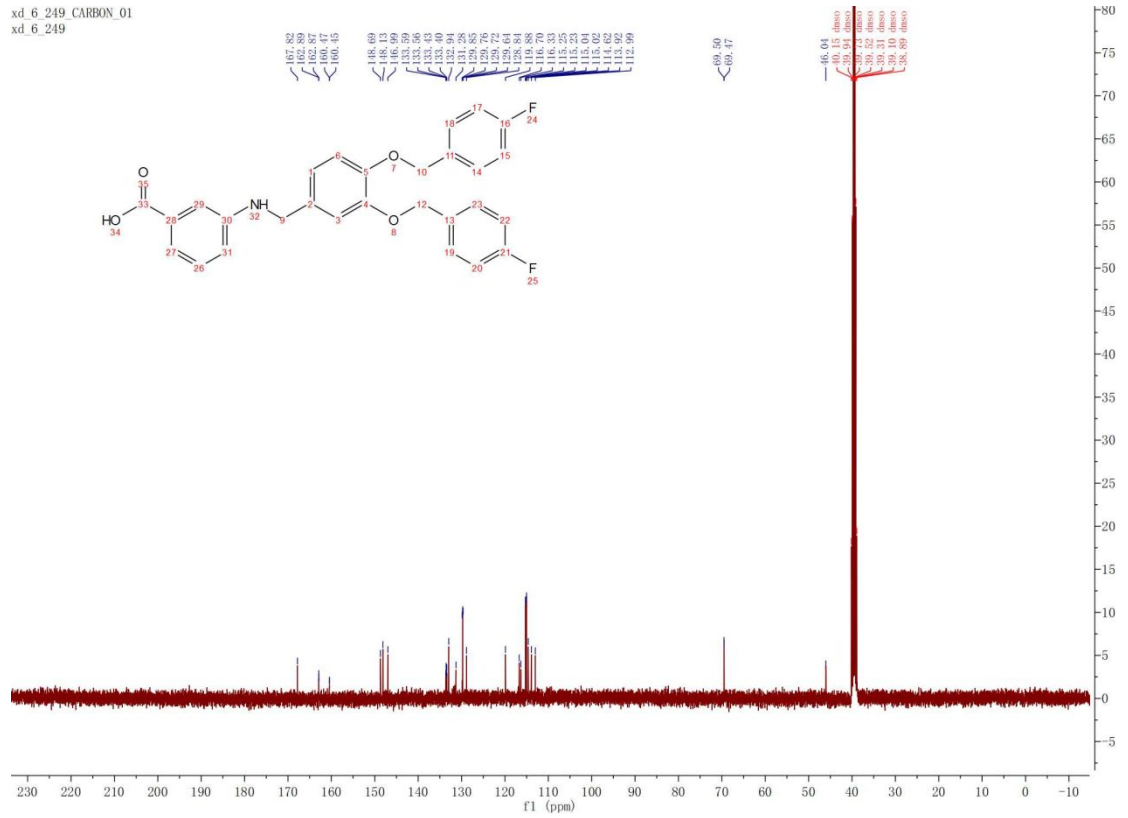

xd\_7\_75\_600 PROTON\_02  
xd\_7\_75\_600

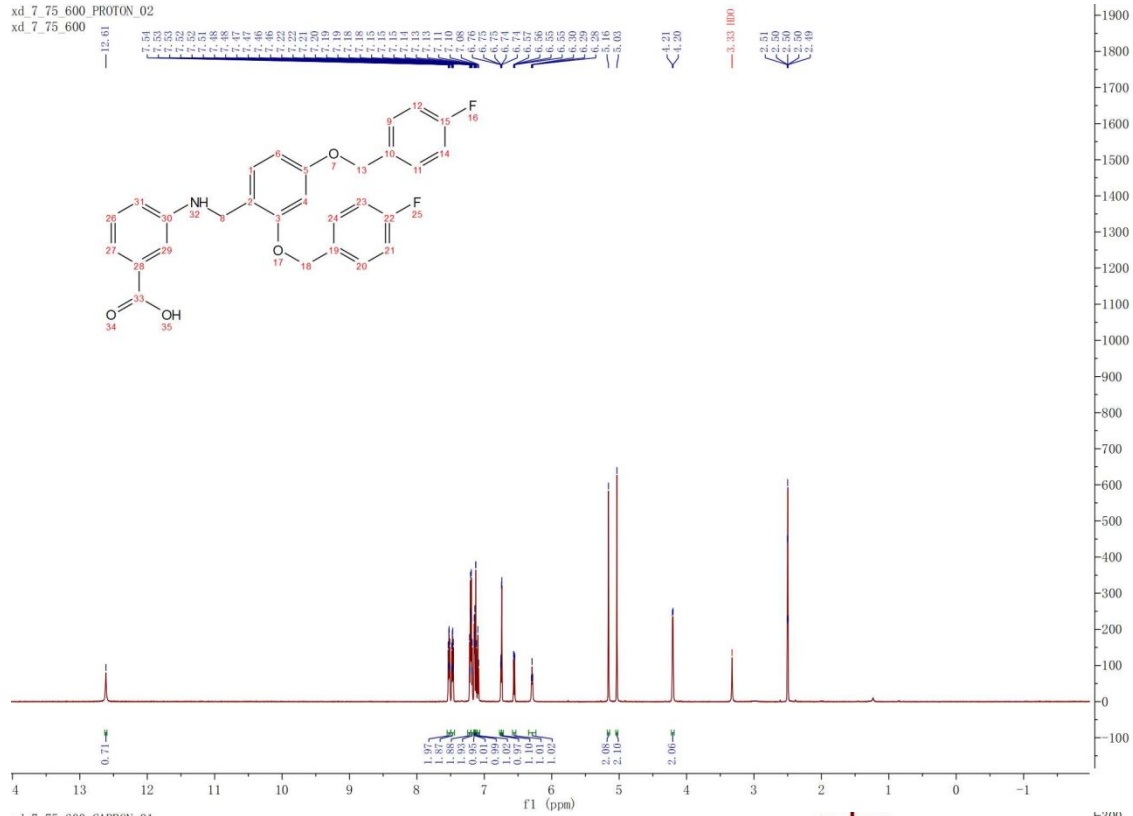

xd\_7\_75\_600 CARBON\_01  
xd\_7\_75\_600

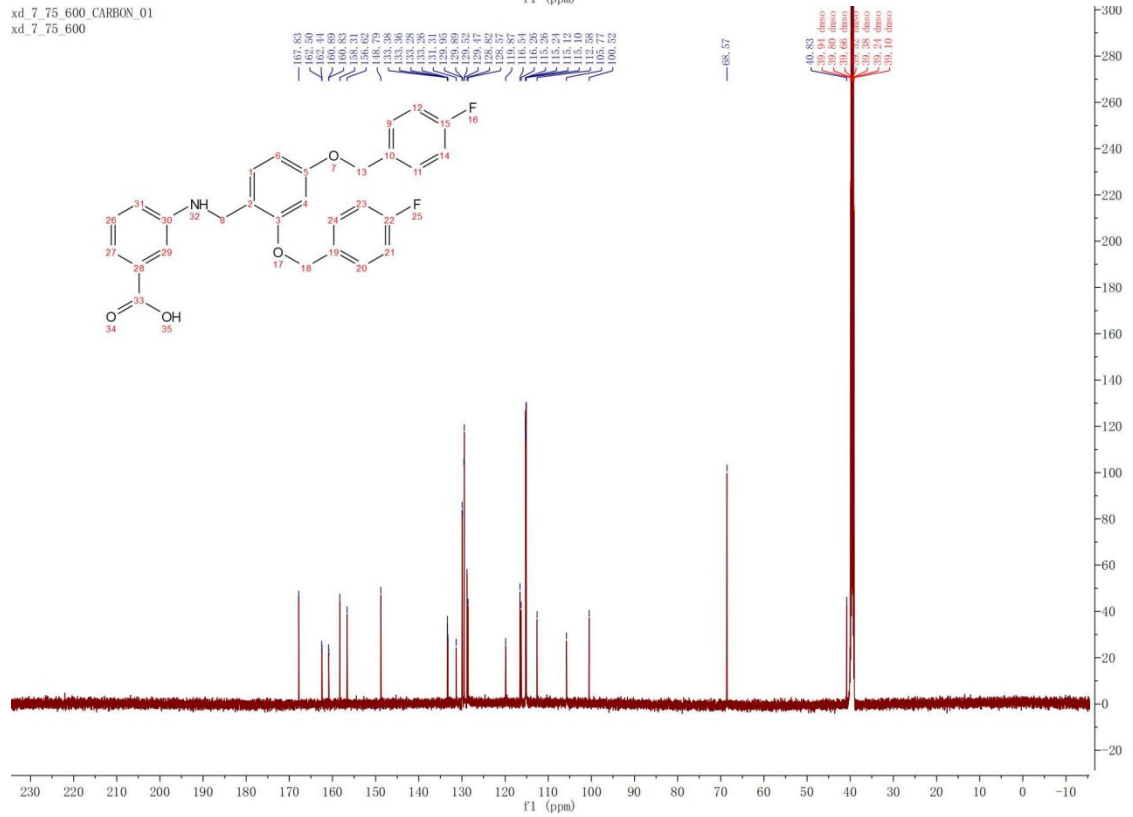

xd\_6\_217\_600\_PROTON\_01  
xd\_6\_217\_600

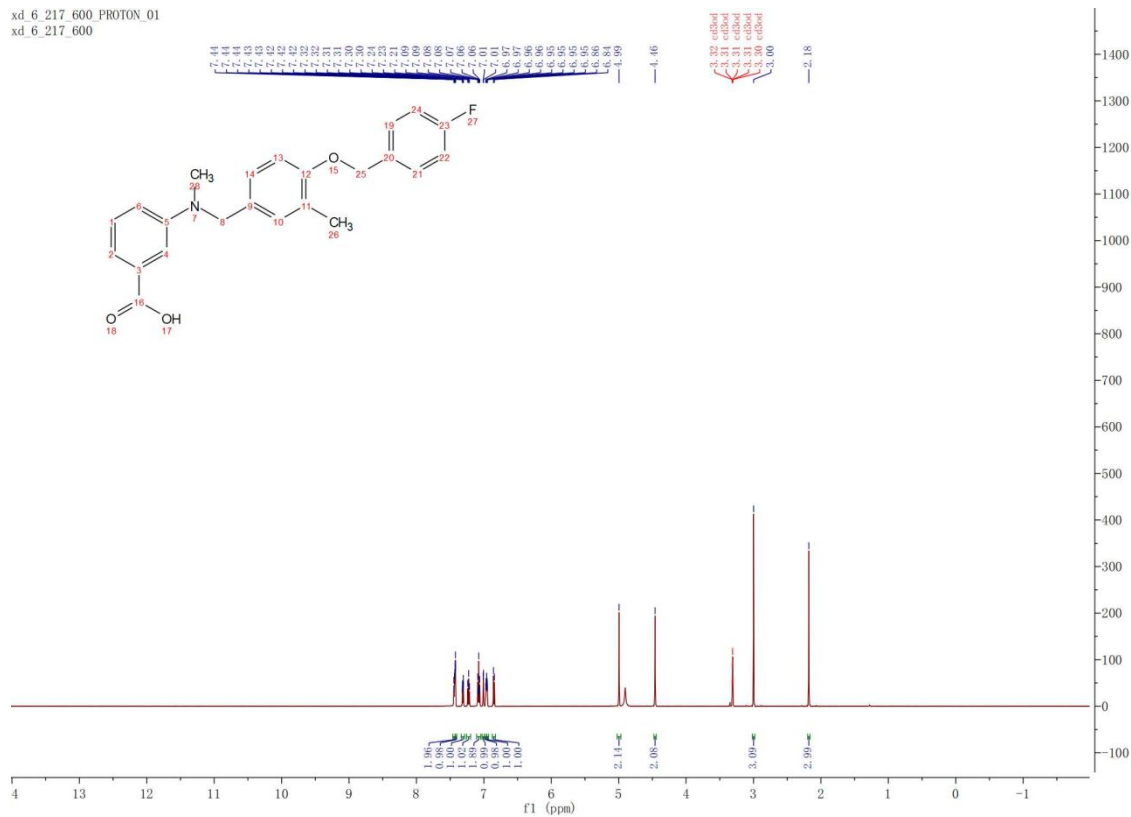

xd\_6\_217\_600 CARBON\_01  
xd\_6\_217\_600

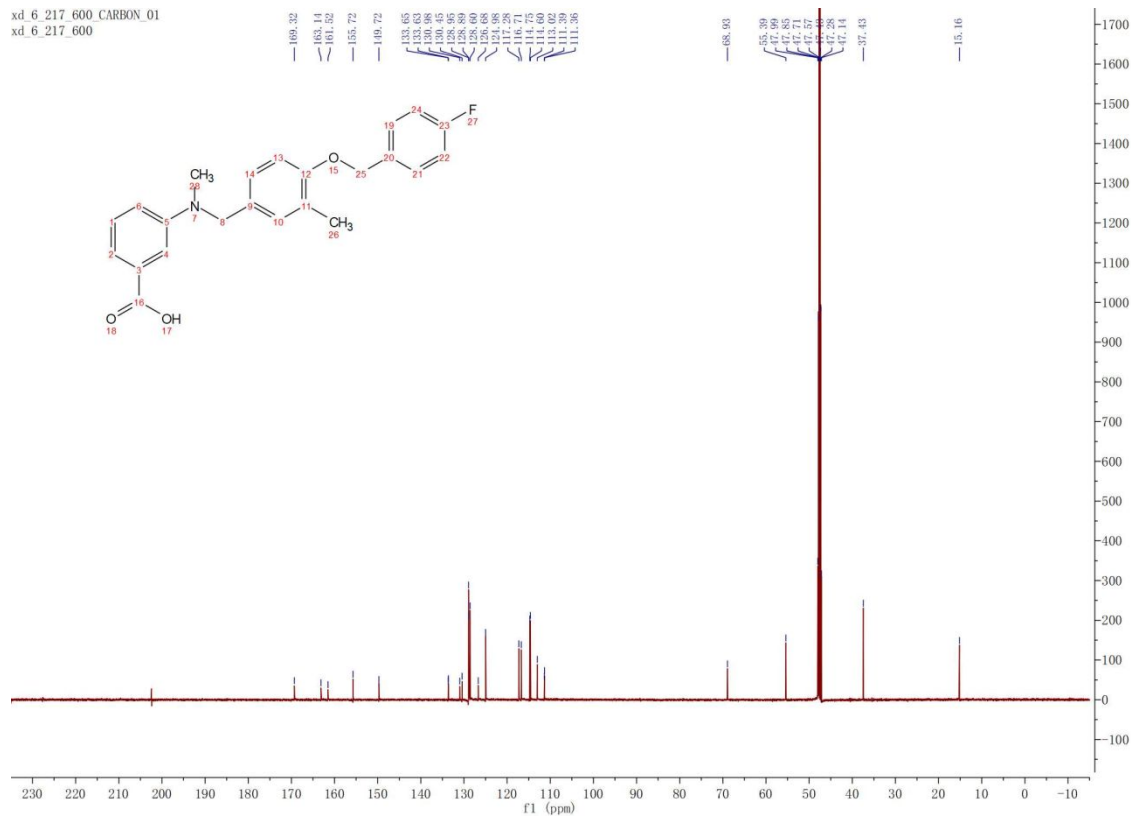

31

DN-5-111\_PROTON\_02  
DN-5-111

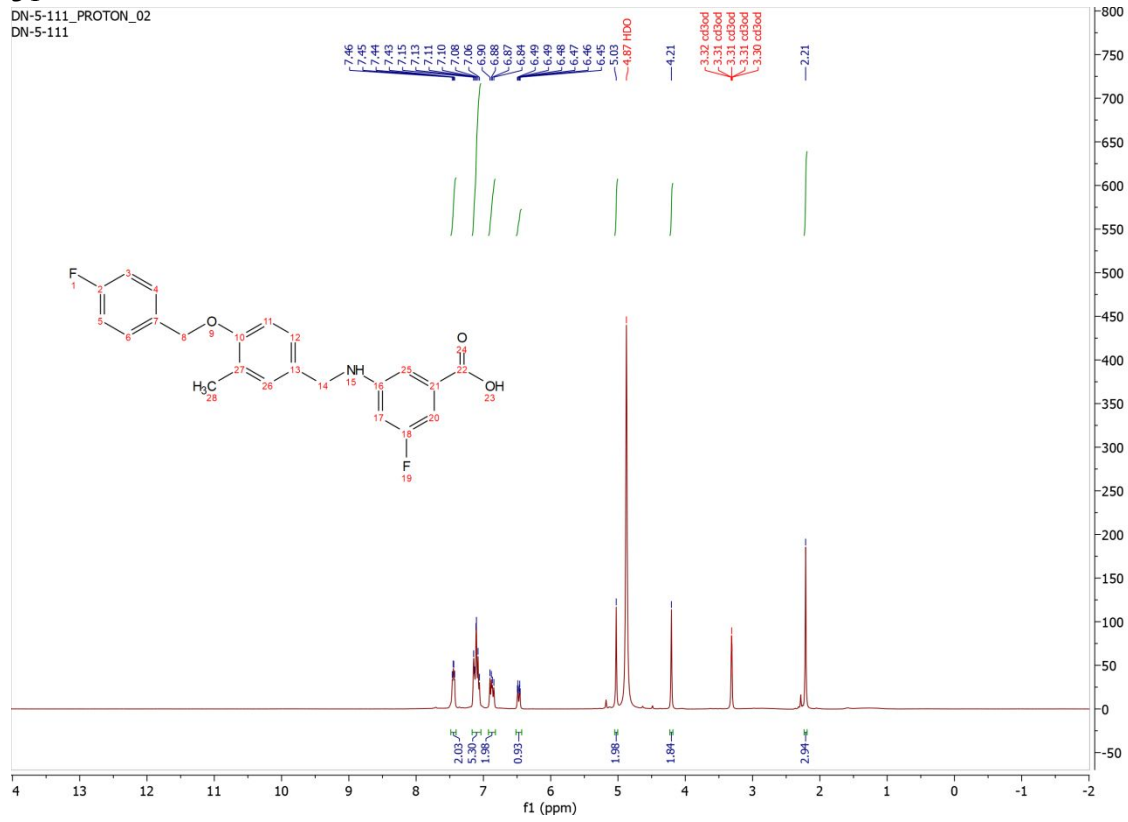

DN-5-111\_CARBON\_02  
DN-5-111

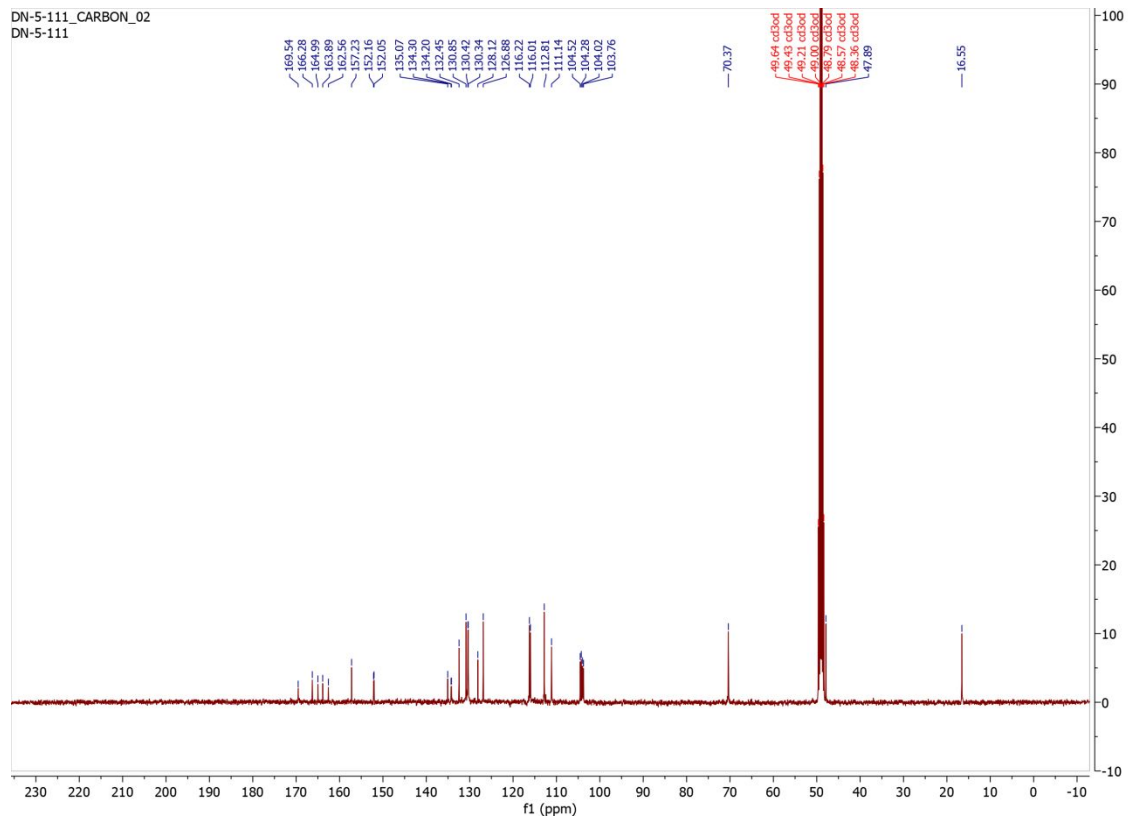



32

DN-5-113\_PROTON\_01  
DN-5-113

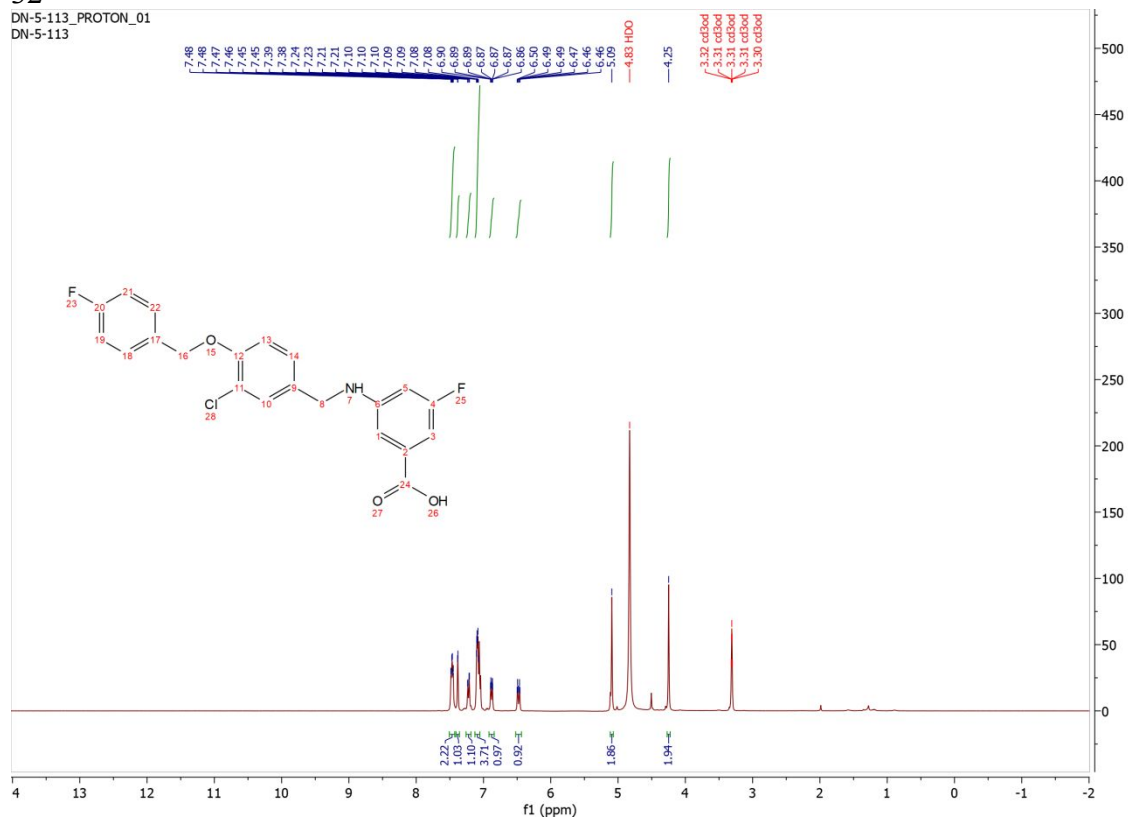

DN-5-113\_CARBON\_01  
DN-5-113

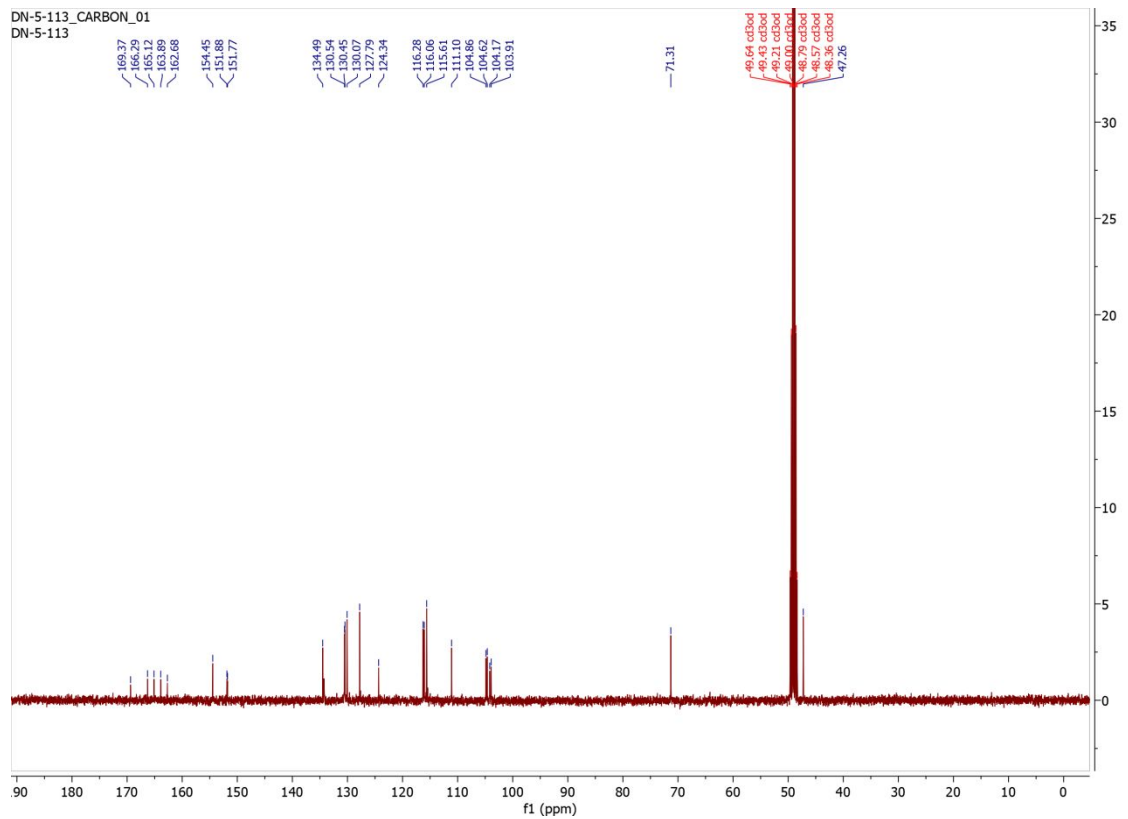



## HPLC Traces

| Peak | RT    | Area   | Height | Type | Saturated | Width | FWHM  | SNR |
|------|-------|--------|--------|------|-----------|-------|-------|-----|
| 1    | 7.2   | 7611.9 | 1917.3 |      |           | 0.293 | 0.059 |     |
| 2    | 8.427 | 94.93  | 23.43  |      |           | 0.24  | 0.057 |     |

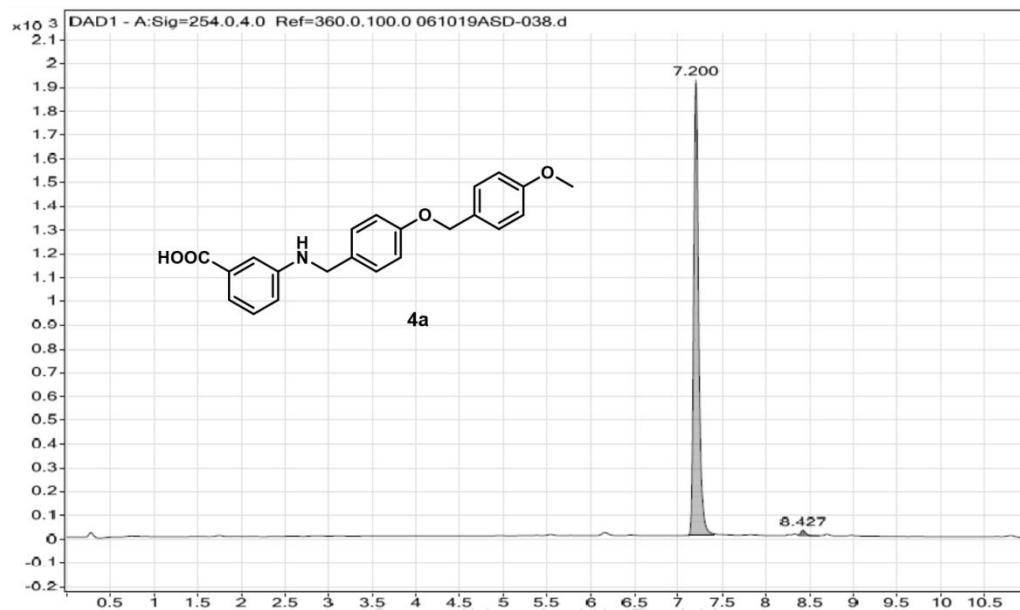

| Peak | RT    | Area   | Height  | Type | Saturated | Width | FWHM  | SNR |
|------|-------|--------|---------|------|-----------|-------|-------|-----|
| 1    | 5.9   | 135.02 | 32.58   |      |           | 0.247 | 0.061 |     |
| 2    | 7.287 | 7833.3 | 2024.17 |      |           | 0.29  | 0.057 |     |

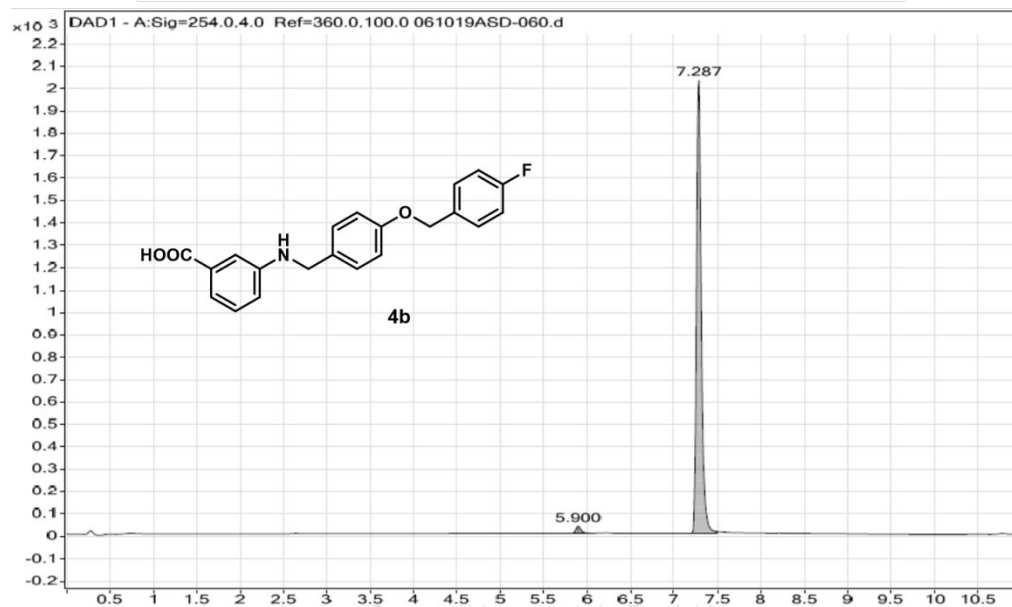

| Peak | RT    | Area   | Height  | Type | Saturated | Width | FWHM  | SNR |
|------|-------|--------|---------|------|-----------|-------|-------|-----|
| 1    | 7.853 | 7214.4 | 1803.97 |      |           | 0.3   | 0.059 |     |

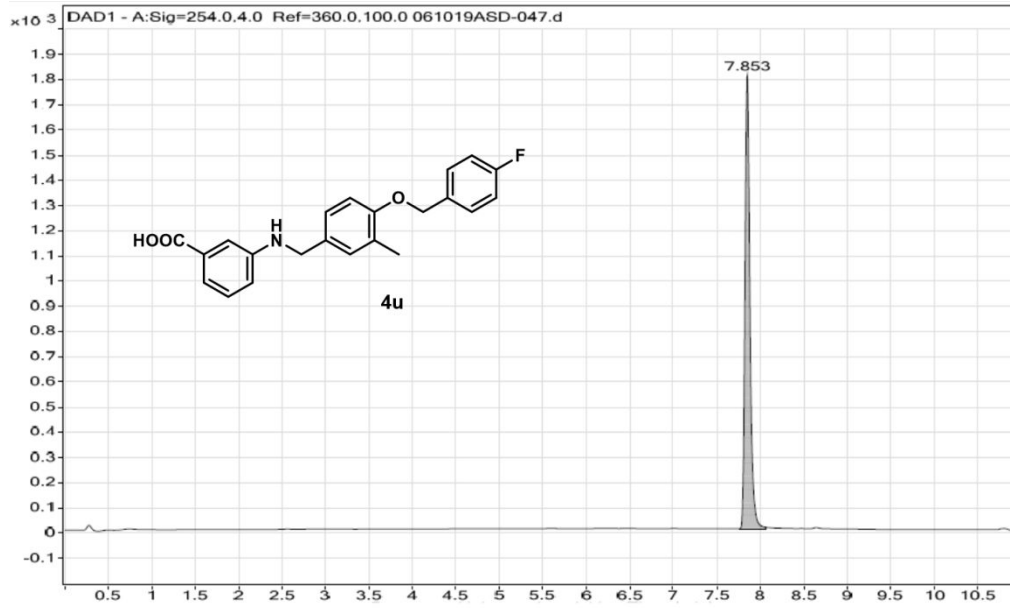

| Peak | RT    | Area   | Height  | Type | Saturated | Width | FWHM  | SNR |
|------|-------|--------|---------|------|-----------|-------|-------|-----|
| 1    | 7.913 | 7258.6 | 1920.86 |      |           | 0.287 | 0.056 |     |

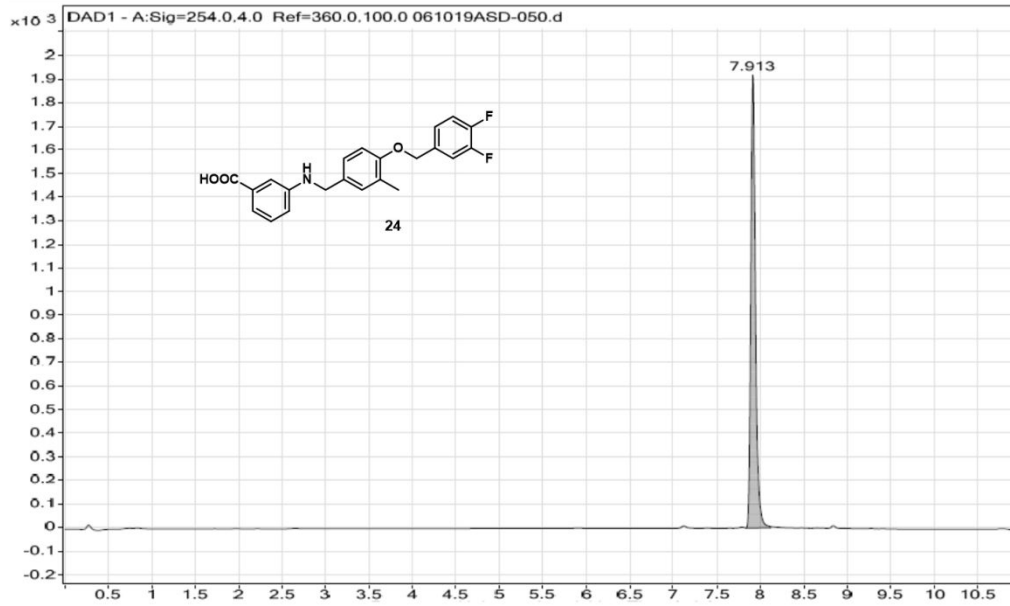

| Peak | RT    | Area   | Height | Type | Saturated | Width | FWHM  | SNR |
|------|-------|--------|--------|------|-----------|-------|-------|-----|
| 1    | 0.28  | 115.51 | 32.09  |      |           | 0.189 | 0.054 |     |
| 2    | 3.867 | 62.05  | 16.78  |      |           | 0.193 | 0.052 |     |
| 3    | 4.4   | 2570.6 | 805.61 |      |           | 0.226 | 0.048 |     |

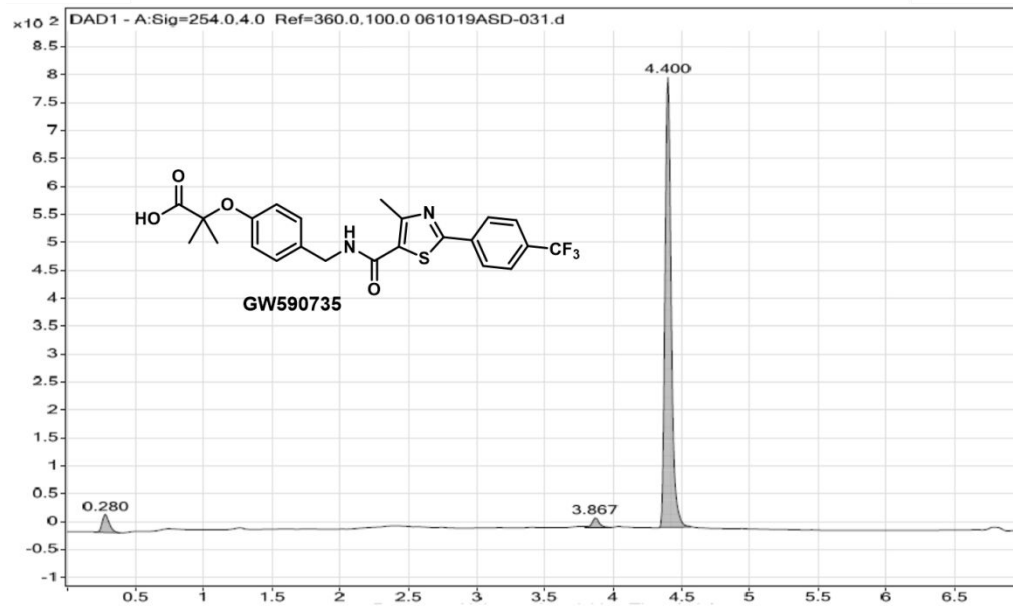

Supplement: NIHMS1577324-supplement-Supplementary_Info.pdf [file NIHMS1577324-supplement-Supplementary_Info.pdf]
